# Supplementary material for: Diterpenoid lanceolatins A–G from Cephalotaxus lanceolata and their anti-inflammatory and anti-tumor activities
Source: Royal Society of Chemistry journal article supplement (doi:10.1039/c4ra10665b), 2014-11-28

**Lanceolatin A-G, diterpenoids from *Cephalotaxus lanceolata* and their anti-inflammatory and anti-tumor activities**

Yi-Ren He,<sup>a</sup> Yun-Heng Shen,<sup>\*,a</sup> Lei Shan,<sup>a</sup> Xi Yang,<sup>a</sup> Bo Wen,<sup>a</sup> Ji Ye,<sup>a</sup> Xing Yuan,<sup>a</sup>  
Hui-Liang Li,<sup>a</sup> Xi-Ke Xu,<sup>a</sup> and Wei-Dong Zhang <sup>\*,a,b</sup>

<sup>a</sup> Department of Phytochemistry, School of Pharmacy, Second Military Medical University, Shanghai 200433, P. R. China. Email: shenyunheng@hotmail.com (Yun-Heng Shen), [wdzhangy@hotmail.com](mailto:wdzhangy@hotmail.com) (Wei-Dong Zhang); Fax: +86-21-81871244/81871245; Tel: +86-21-81871244/81871245

<sup>b</sup> School of Pharmacy, Shanghai Jiao Tong University, 800 Dongchuan Road, Shanghai 200240, P. R. China

## Contents

**Figure S1** HR-ESI-MS of Lanceolatin A (1)

**Figure S2** IR(KBr) of Lanceolatin A (1)

**Figure S3**  $^1\text{H}$  NMR of Lanceolatin A (1)

**Figure S4**  $^{13}\text{C}$  NMR of Lanceolatin A (1)

**Figure S5** DEPT of Lanceolatin A (1)

**Figure S6** HMQC of Lanceolatin A (1)

**Figure S7** HMBC of Lanceolatin A (1)

**Figure S8** NOSEY of Lanceolatin A (1)

**Figure S9** HR-ESI-MS of Lanceolatin B (2)

**Figure S10** IR(KBr) of Lanceolatin B (2)

**Figure S11**  $^1\text{H}$  NMR of Lanceolatin B (2)

**Figure S12**  $^{13}\text{C}$  NMR of Lanceolatin B (2)

**Figure S13** DEPT of Lanceolatin B (2)

**Figure S14** HMQC of Lanceolatin B (2)

**Figure S15** HMBC of Lanceolatin B (2)

**Figure S16** NOSEY of Lanceolatin B (2)

**Figure S17** HR-ESI-MS of Lanceolatin C

**Figure S18** IR(KBr) of Lanceolatin C (3)

**Figure S19**  $^1\text{H}$  NMR of Lanceolatin C (3)

**Figure S20**  $^{13}\text{C}$  NMR of Lanceolatin C (3)

**Figure S21** DEPT of Lanceolatin C (3)

**Figure S22** HMQC of Lanceolatin C (3)

**Figure S23** HMBC of Lanceolatin C (3)

**Figure S24** NOSEY of Lanceolatin C (3)

**Figure S25** HR-ESI-MS of Lanceolatin D (4)

**Figure S26** IR(KBr) of Lanceolatin D (4)

**Figure S27**  $^1\text{H}$  NMR of Lanceolatin D (4)

**Figure S28**  $^{13}\text{C}$  NMR and DEPT of Lanceolatin D (4)

**Figure S29** HMQC of Lanceolatin D (4)

**Figure S30** HMBC of Lanceolatin D (4)

**Figure S31** NOSEY of Lanceolatin D (4)

**Figure S32** HR-ESI-MS of Lanceolatin E (5)

**Figure S33** IR(KBr) of Lanceolatin E (5)

**Figure S34**  $^1\text{H}$  NMR of Lanceolatin E (5)

**Figure S35**  $^{13}\text{C}$  NMR of Lanceolatin E (5)

**Figure S36** DEPT of Lanceolatin E (5)

**Figure S37** HMQC of Lanceolatin E (5)

**Figure S38** HMBC of Lanceolatin E (5)

**Figure S39** NOSEY of Lanceolatin E (5)

**Figure S40** HR-ESI-MS of Lanceolatin F (6)

**Figure S41** IR(KBr) of Lanceolatin F (6)

**Figure S42**  $^1\text{H}$  NMR of Lanceolatin F (6)

**Figure S43**  $^{13}\text{C}$  NMR of Lanceolatin F (6)

**Figure S44** DEPT of Lanceolatin F (6)

**Figure S45** HMQC of Lanceolatin F (6)

**Figure S46** HMBC of Lanceolatin F (6)

**Figure S47** NOSEY of Lanceolatin F (6)

**Figure S48** HR-ESI-MS of Lanceolatin G (7)

**Figure S49** IR(KBr) of Lanceolatin G (7)

**Figure S50**  $^1\text{H}$  NMR of Lanceolatin G (7)

**Figure S51**  $^{13}\text{C}$  NMR and DEPT of Lanceolatin G (7)

**Figure S52** HMQC of Lanceolatin G (7)

**Figure S53** HMBC of Lanceolatin G (7)

**Figure S54** NOSEY of Lanceolatin G (7)

# Lanceolatin A

**Figure S1** HR-ESI-MS of Lanceolatin A (1)

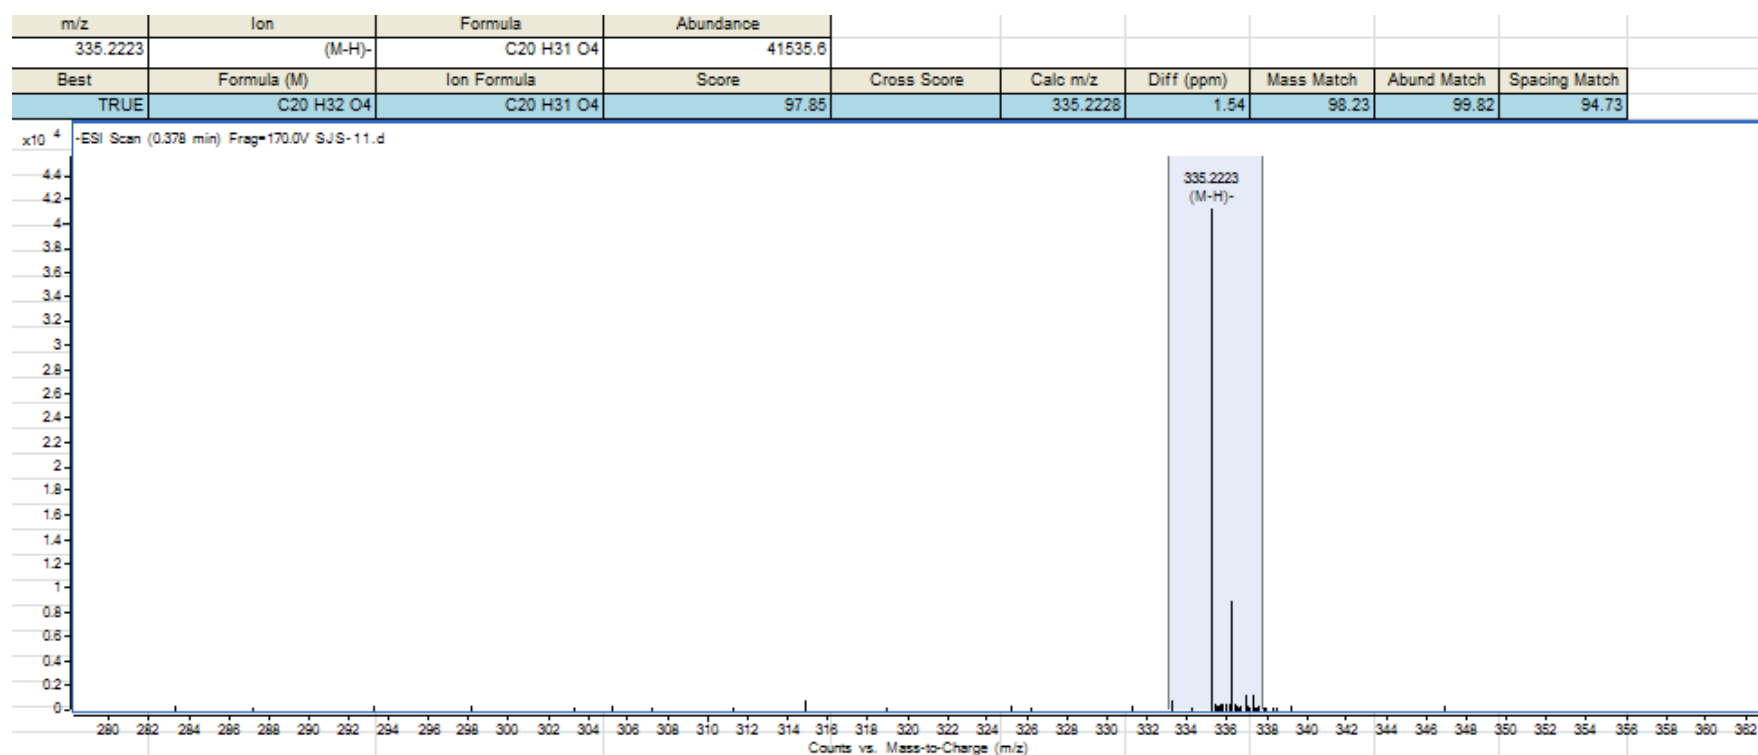

**Figure S2** IR(KBr) of Lanceolatin A (**1**)

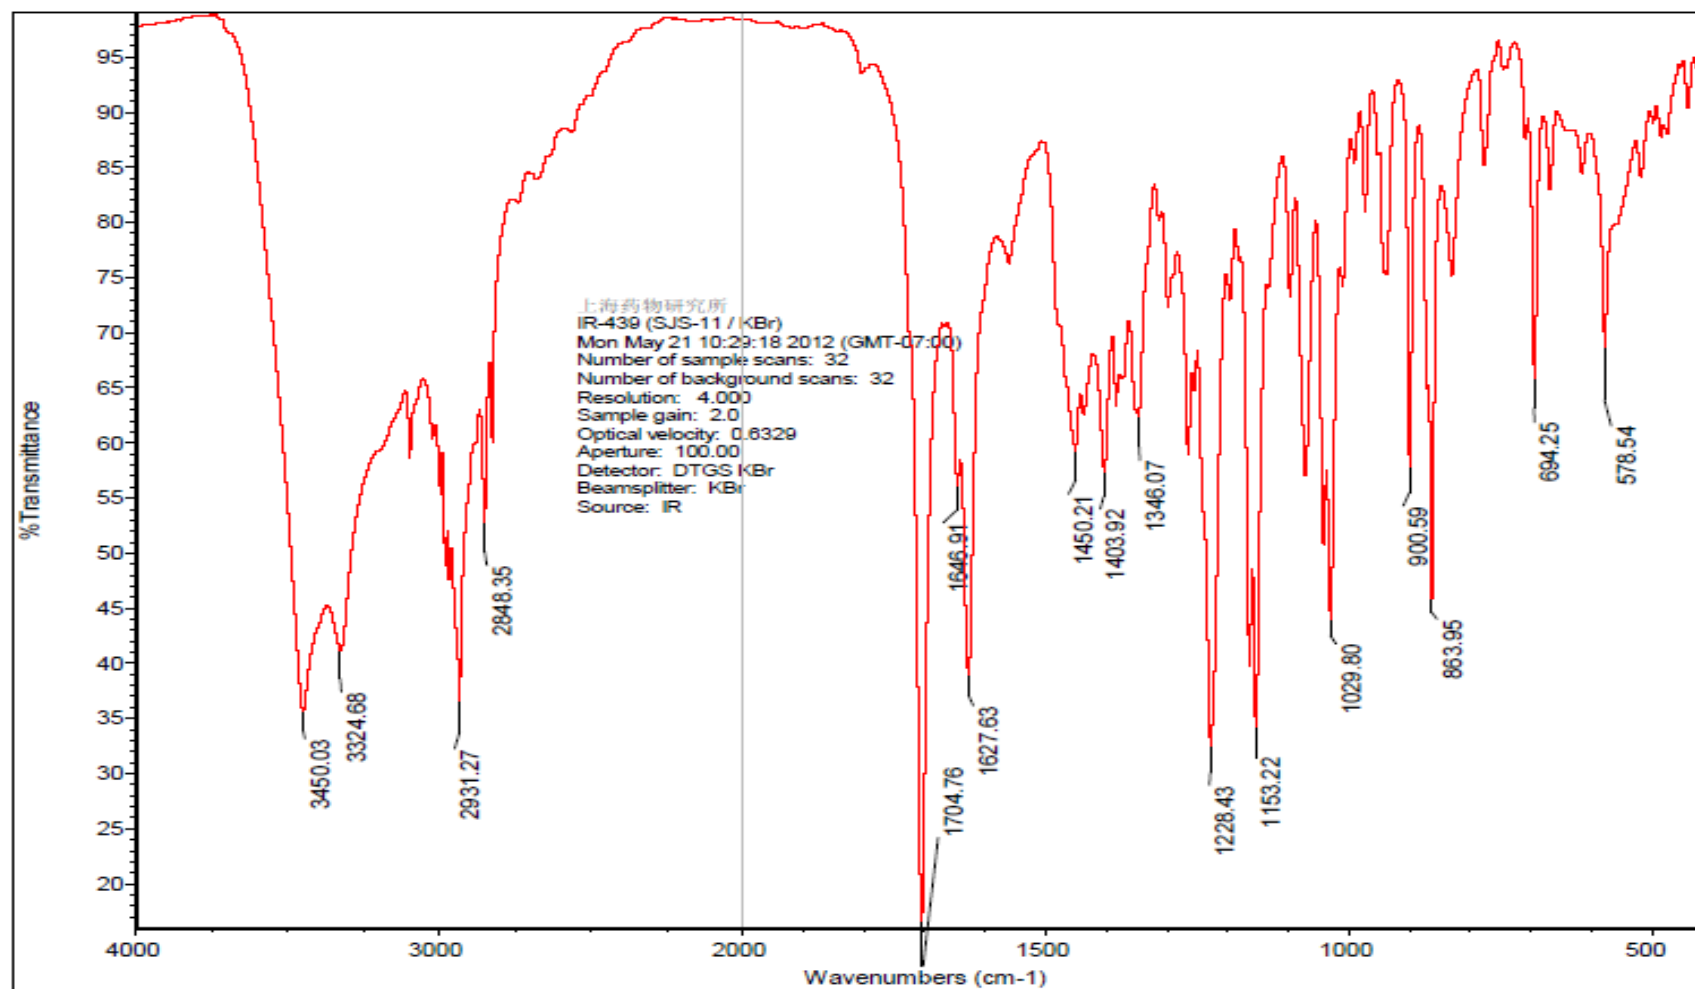

**Figure S3**  $^1\text{H}$  NMR of Lanceolatin A (**1**)

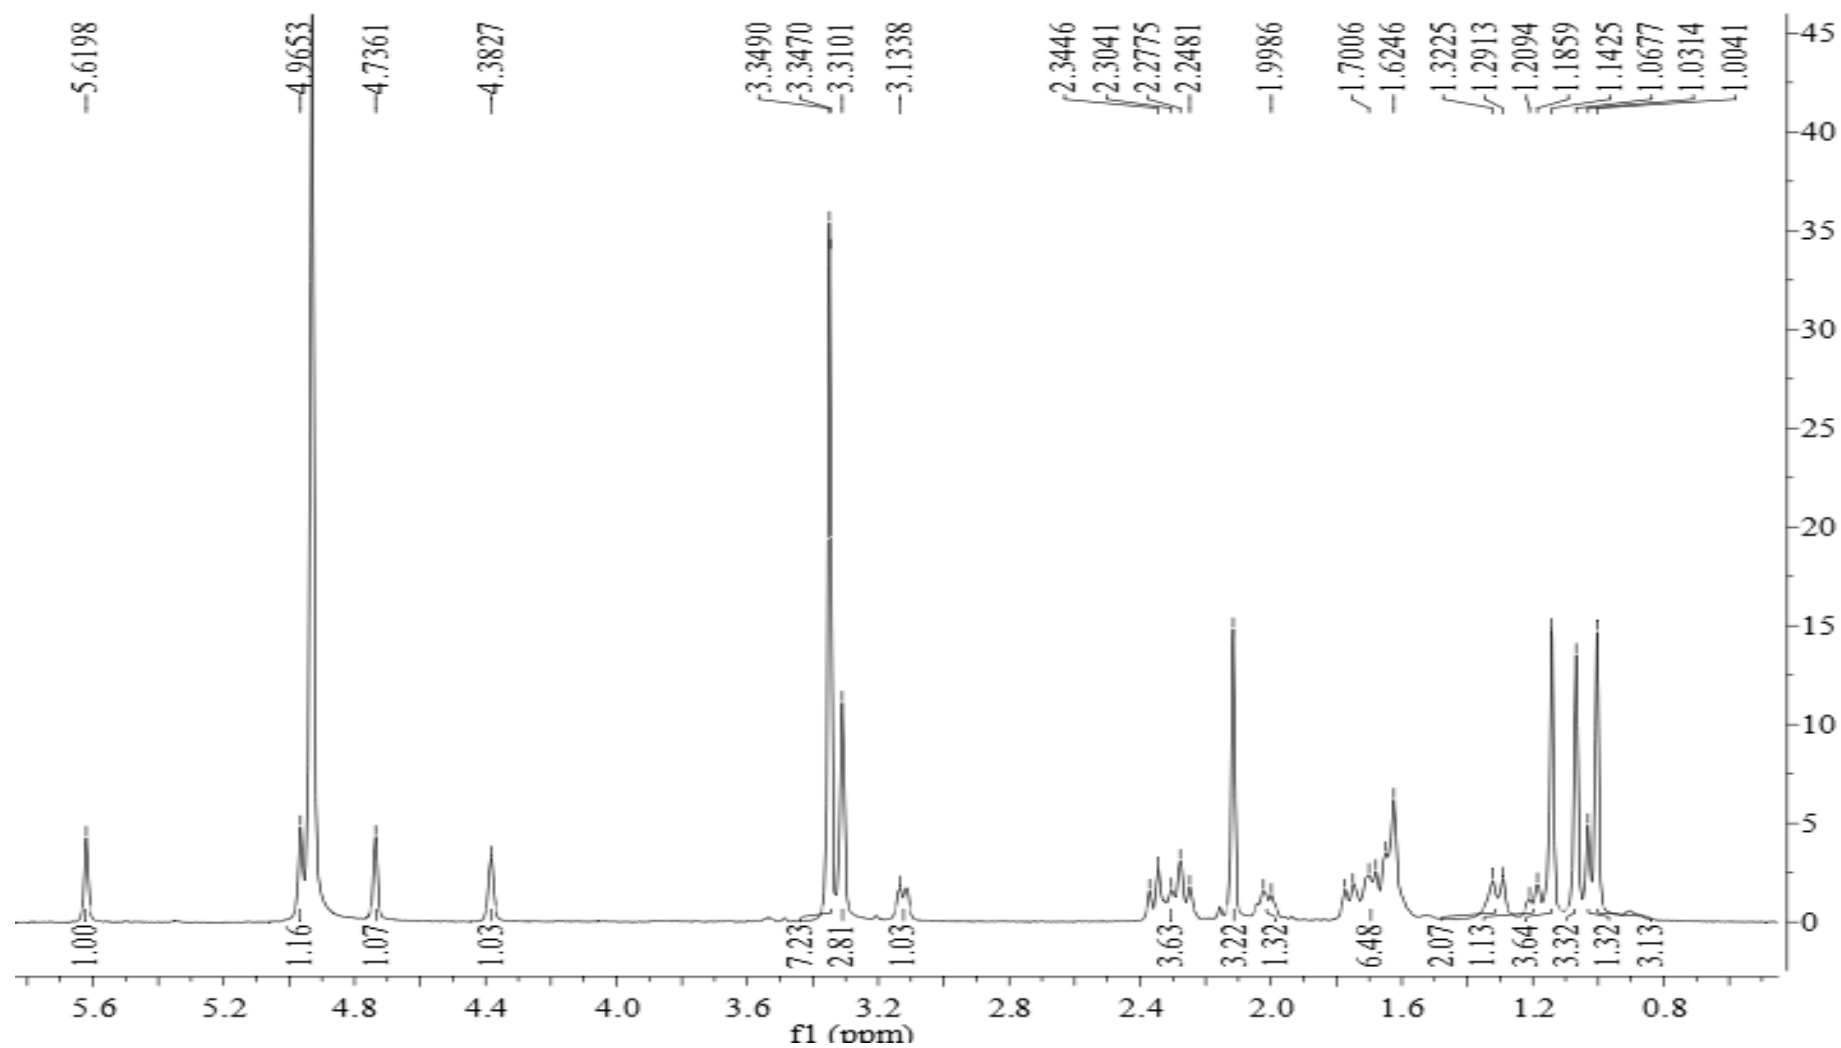

**Figure S4**  $^{13}\text{C}$  NMR of Lanceolatin A (**1**)

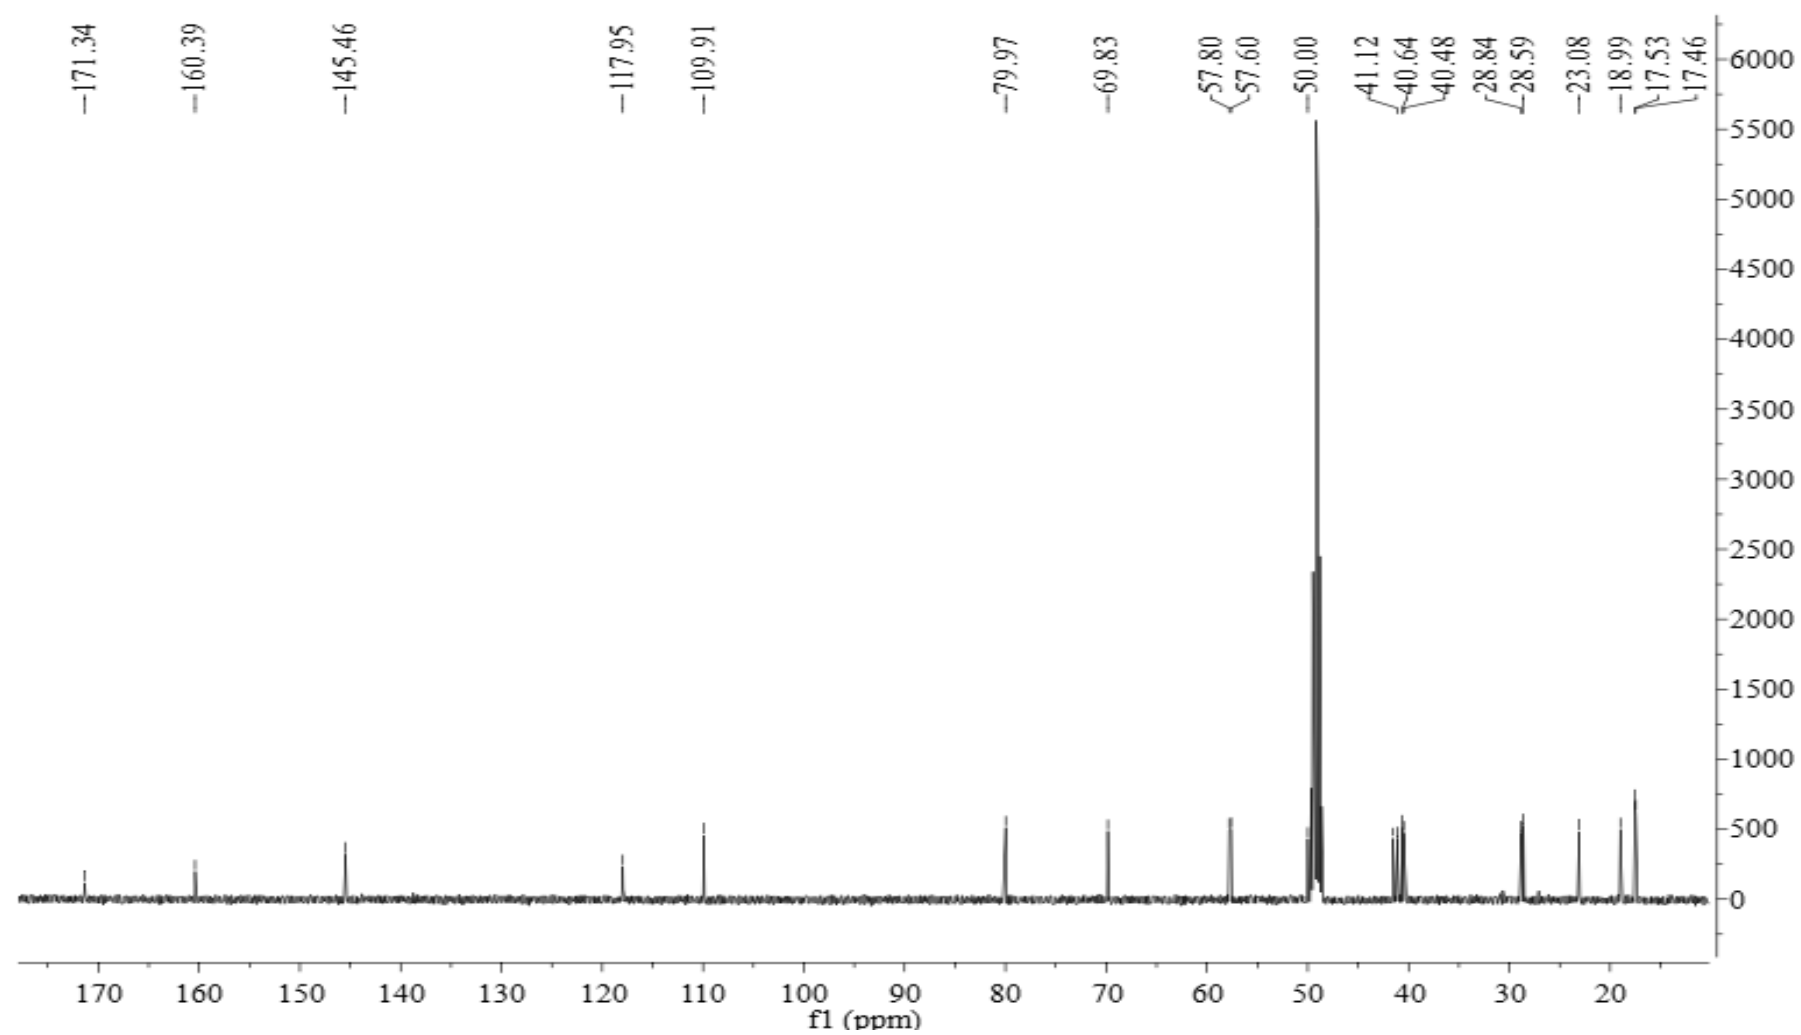

Figure S5 DEPT of Lanceolatin A (**1**)

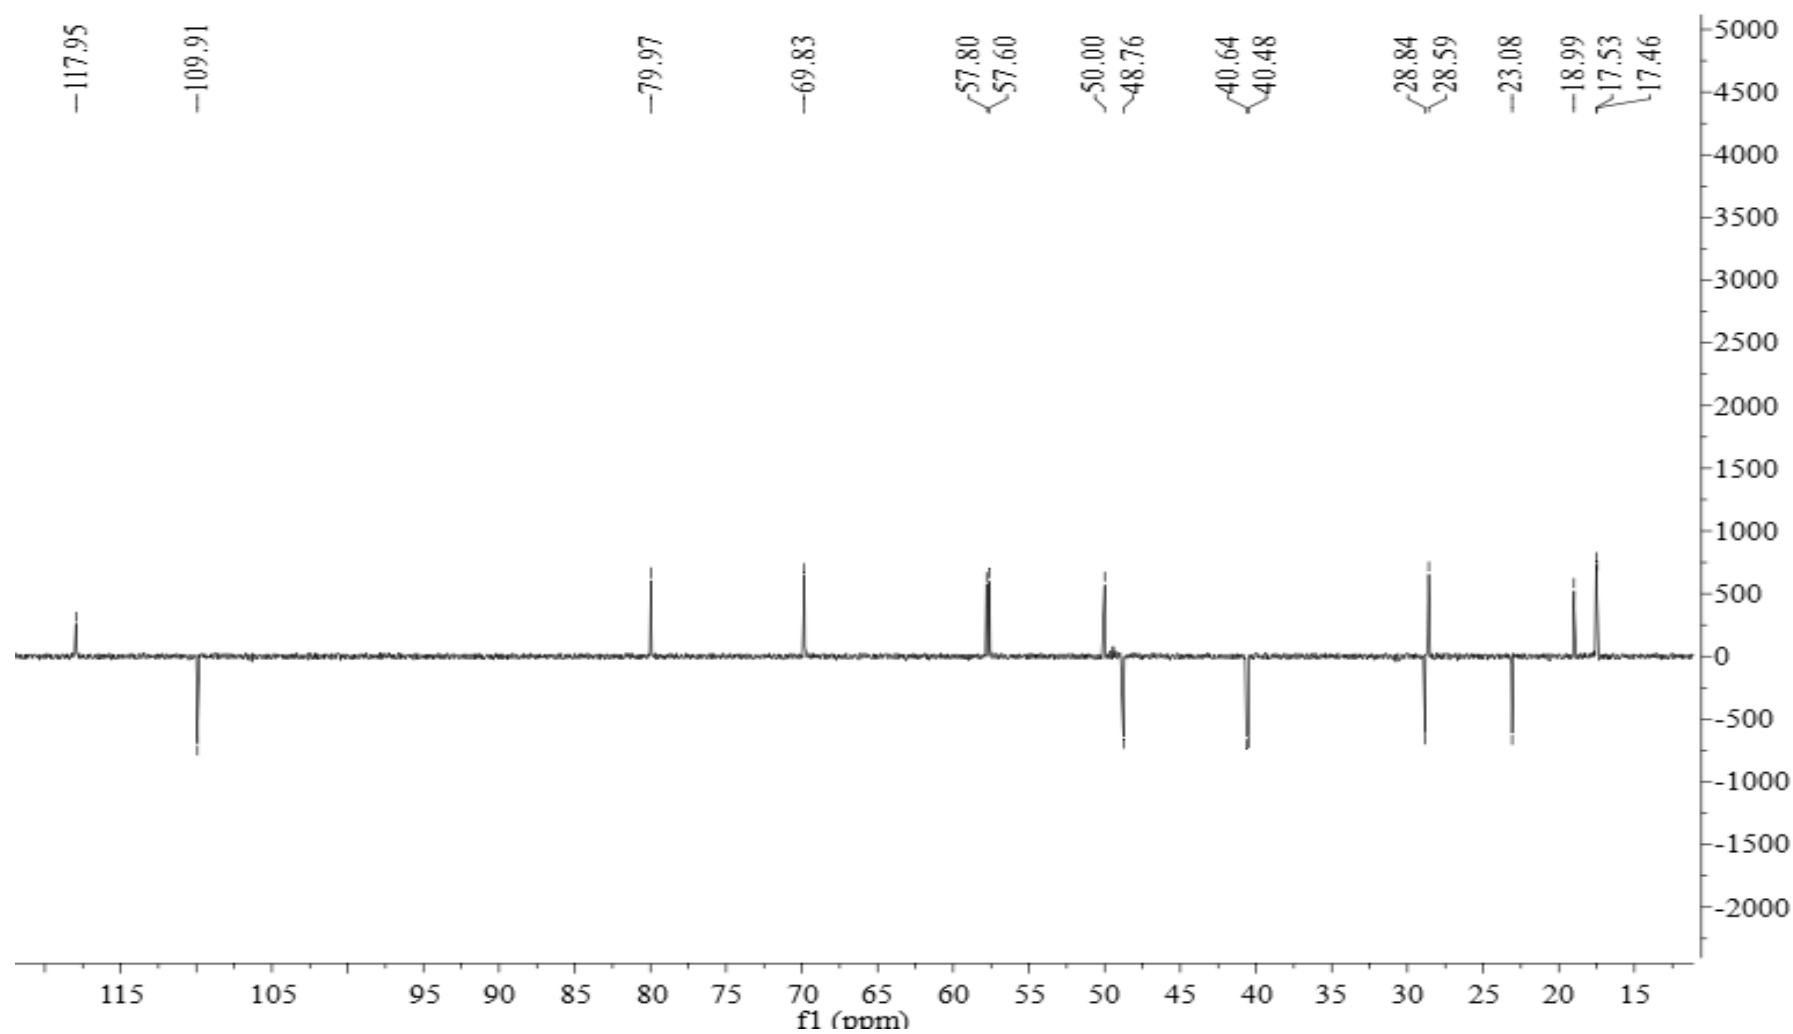



**Figure S6** HMQC of Lanceolatin A (**1**)

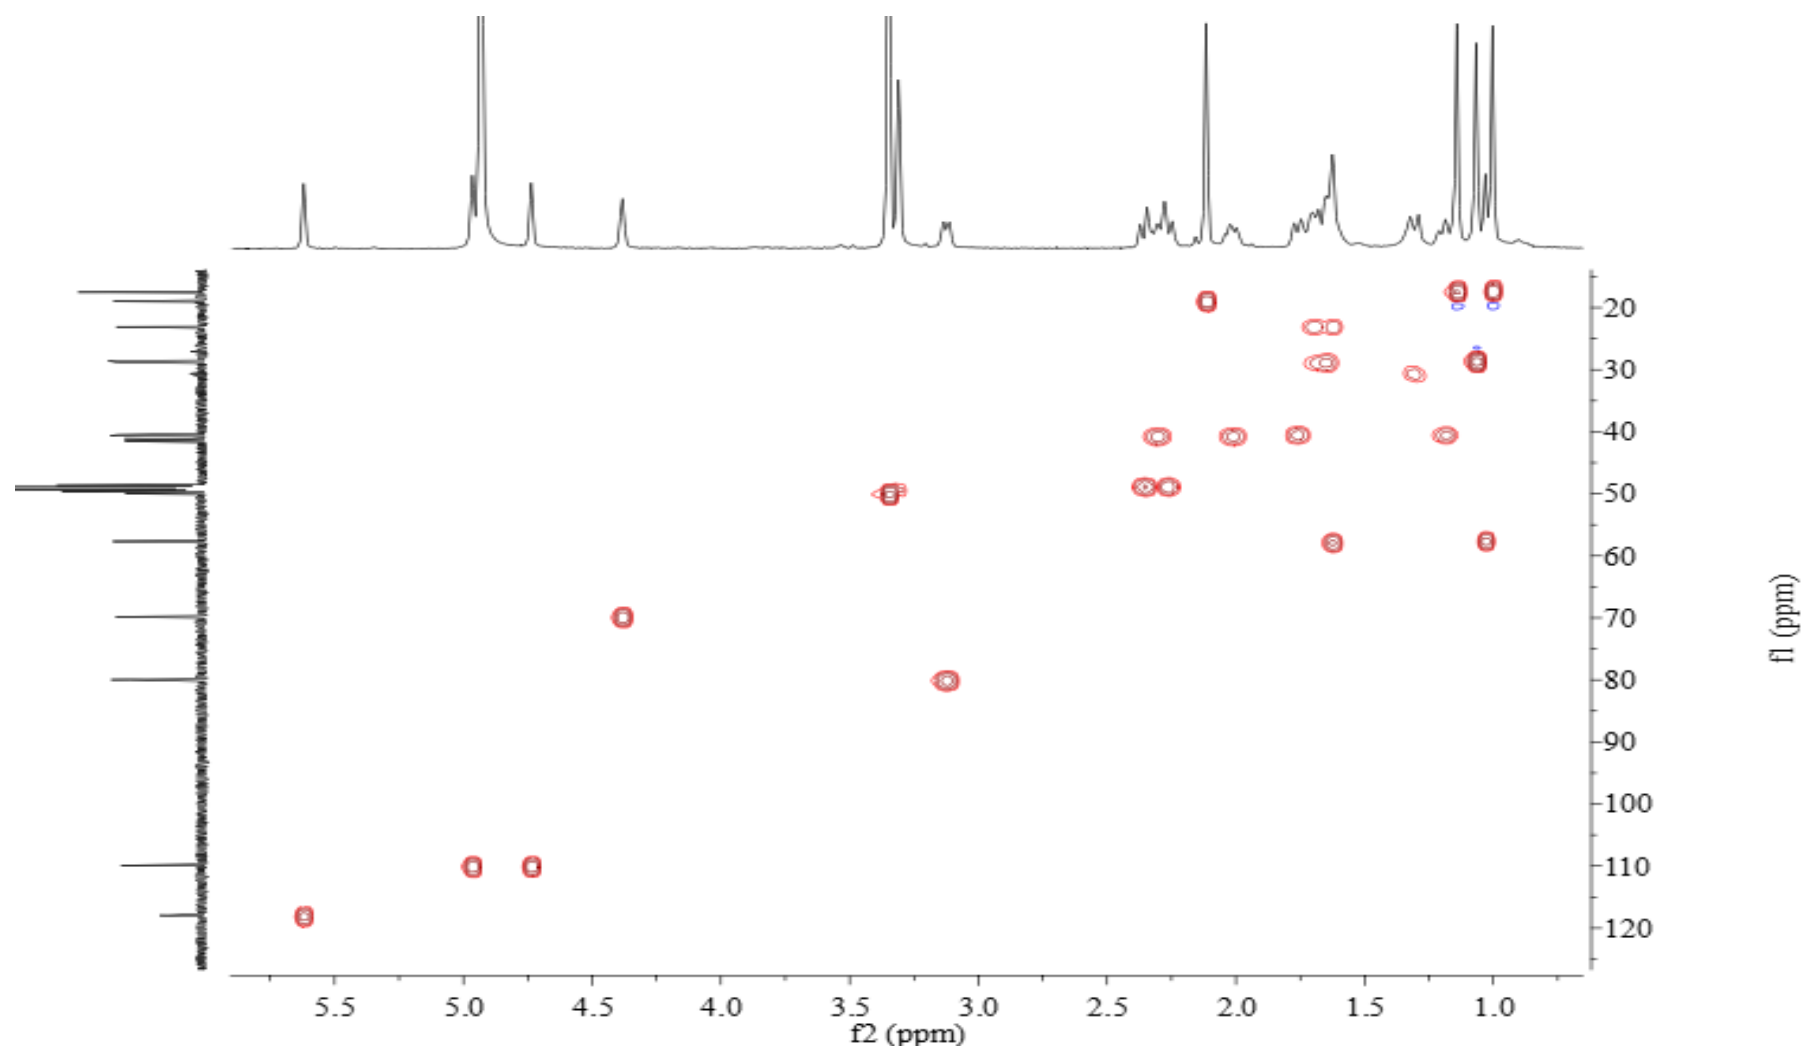

**Figure S7** HMBC of Lanceolatin A (**1**)

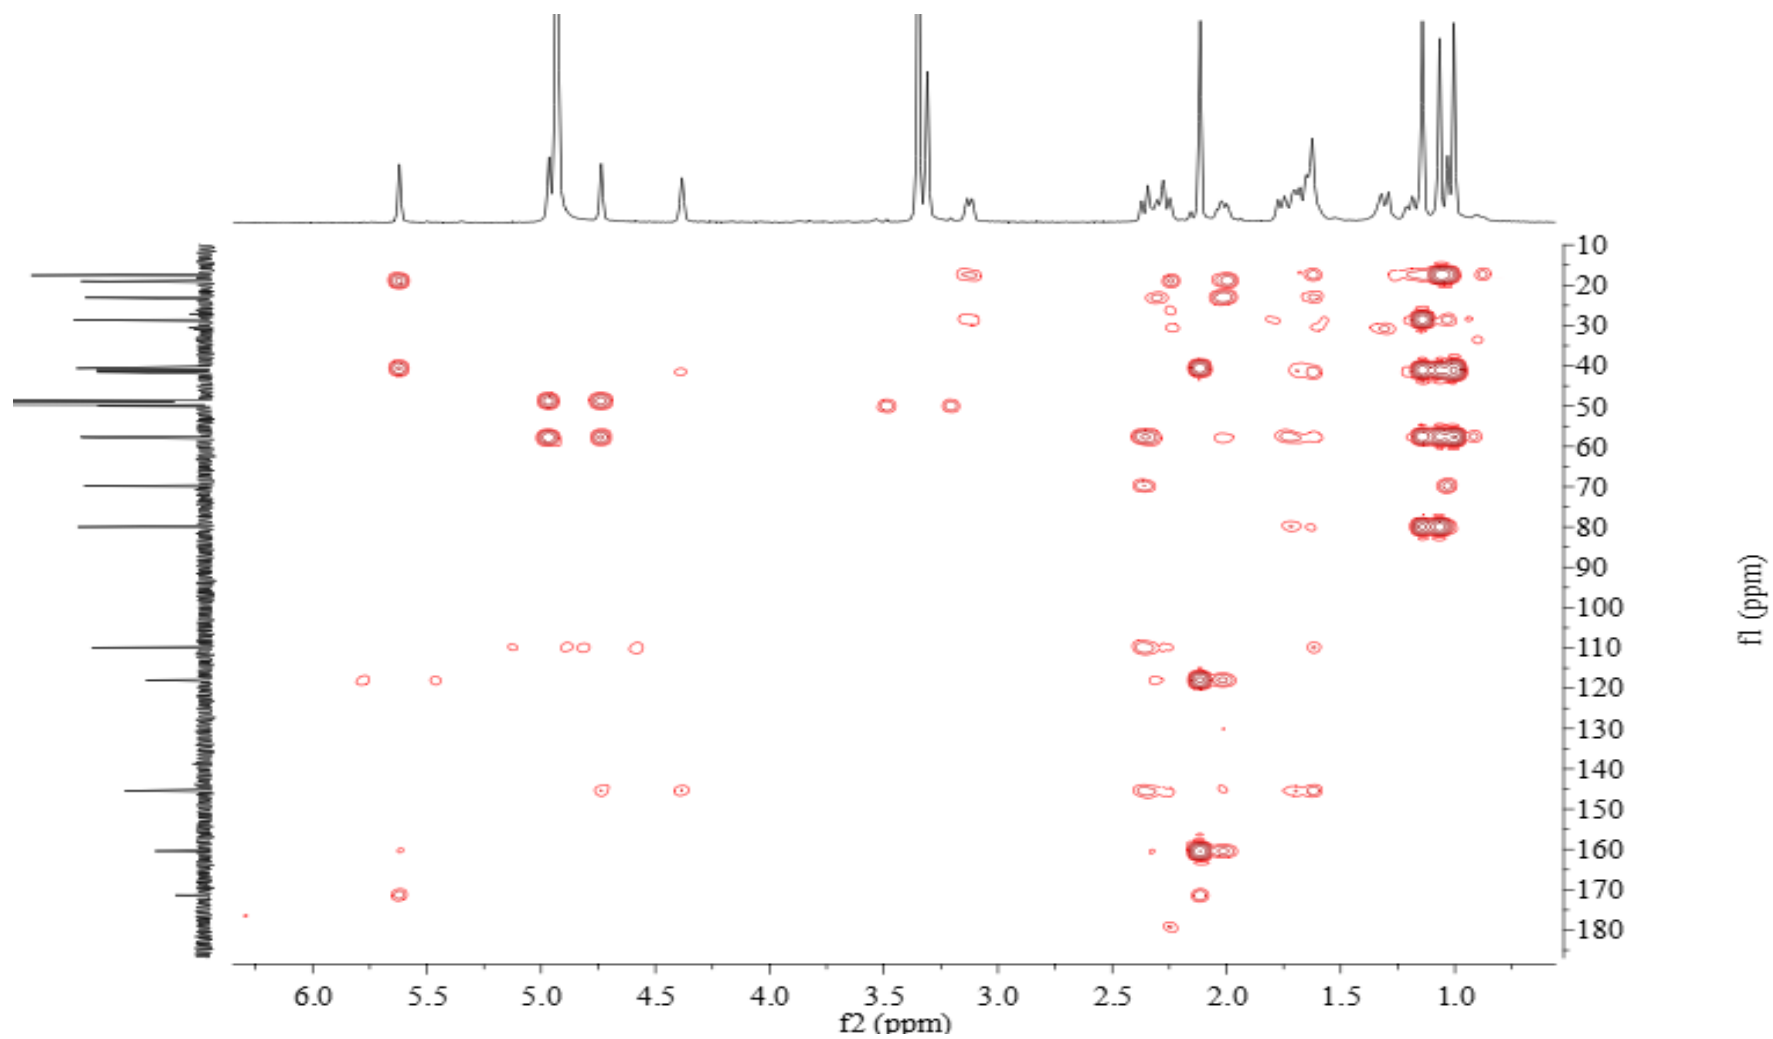

**Figure S8** NOSEY of Lanceolatin A (**1**)

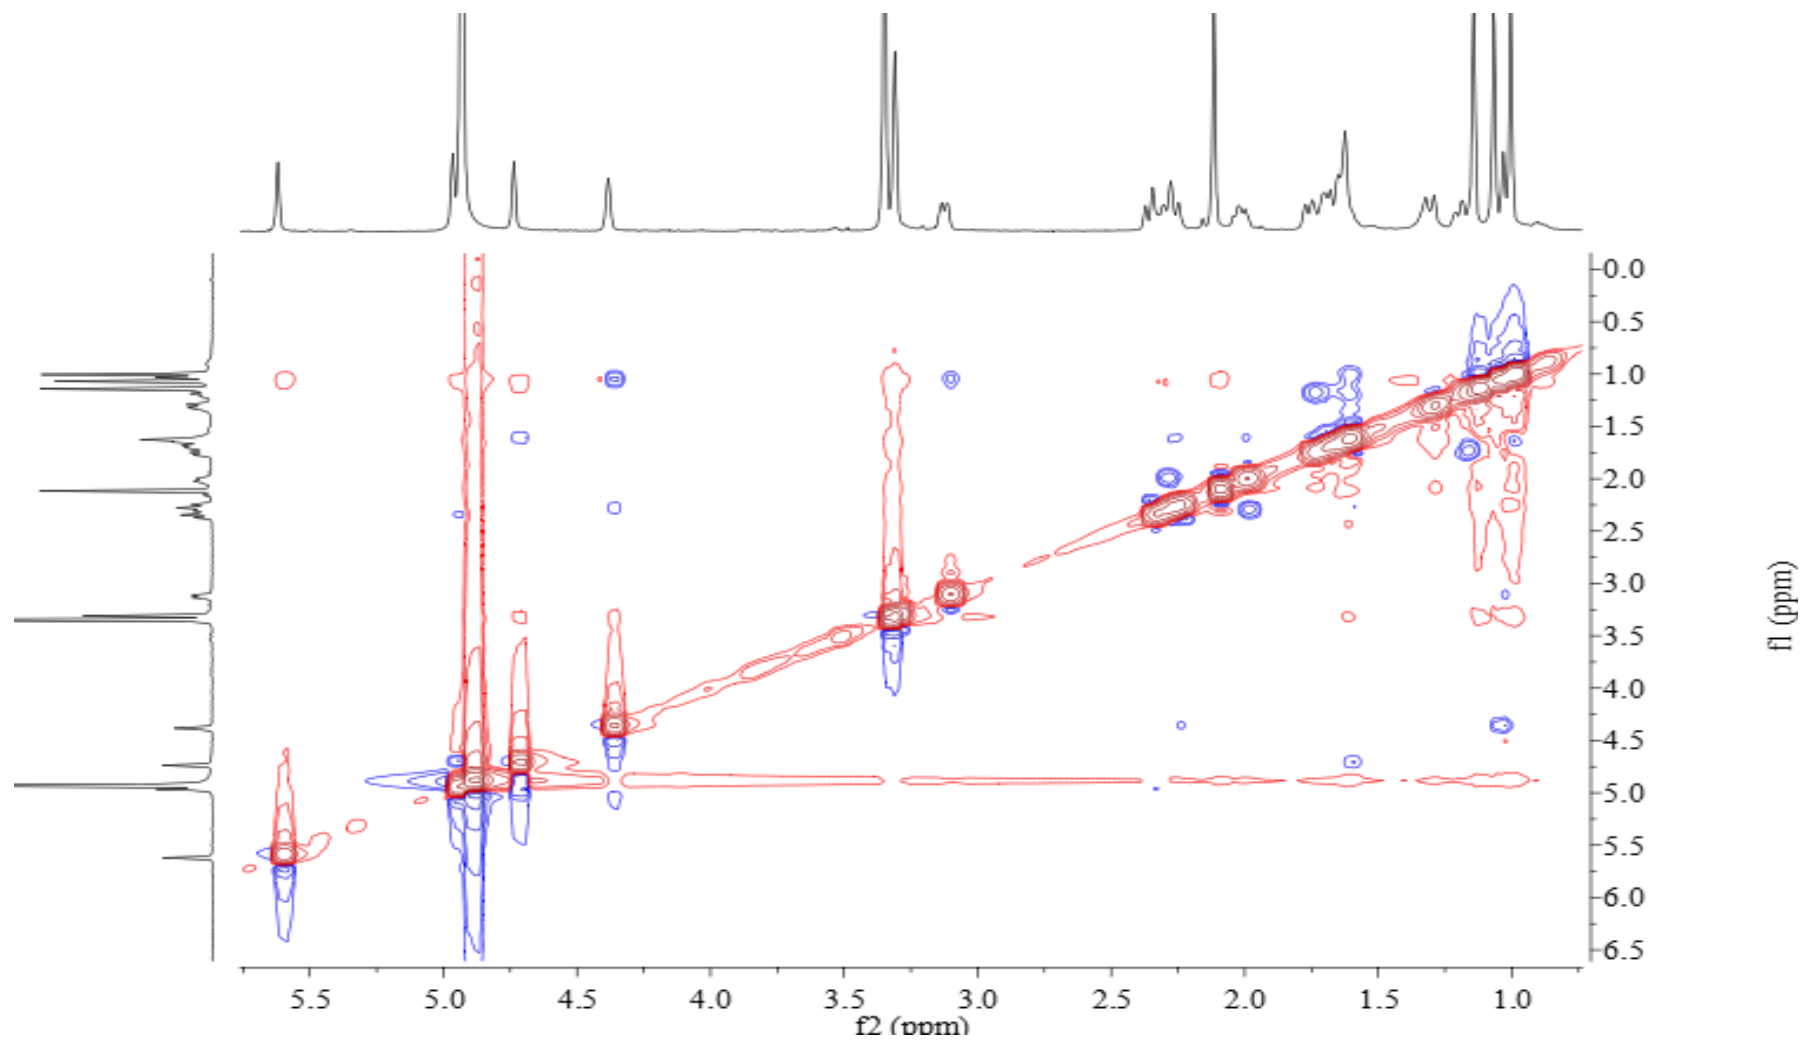

## Lanceolatin B (2)

**Figure S9** HR-ESI-MS of Lanceolatin B

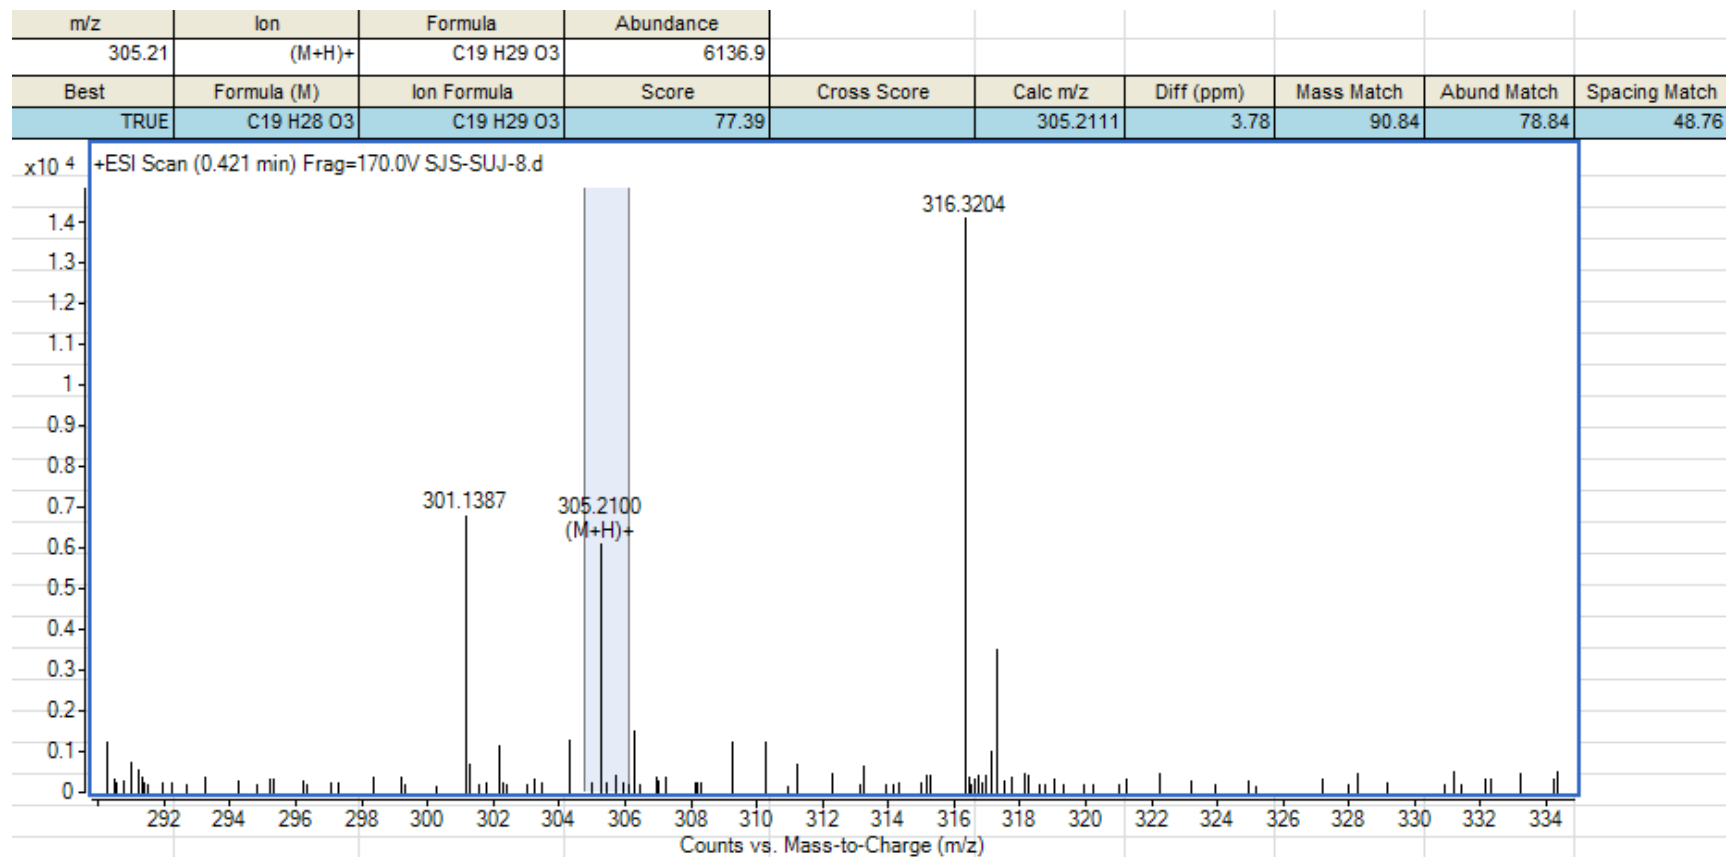

**Figure S10** IR(KBr) of Lanceolatin B (2)

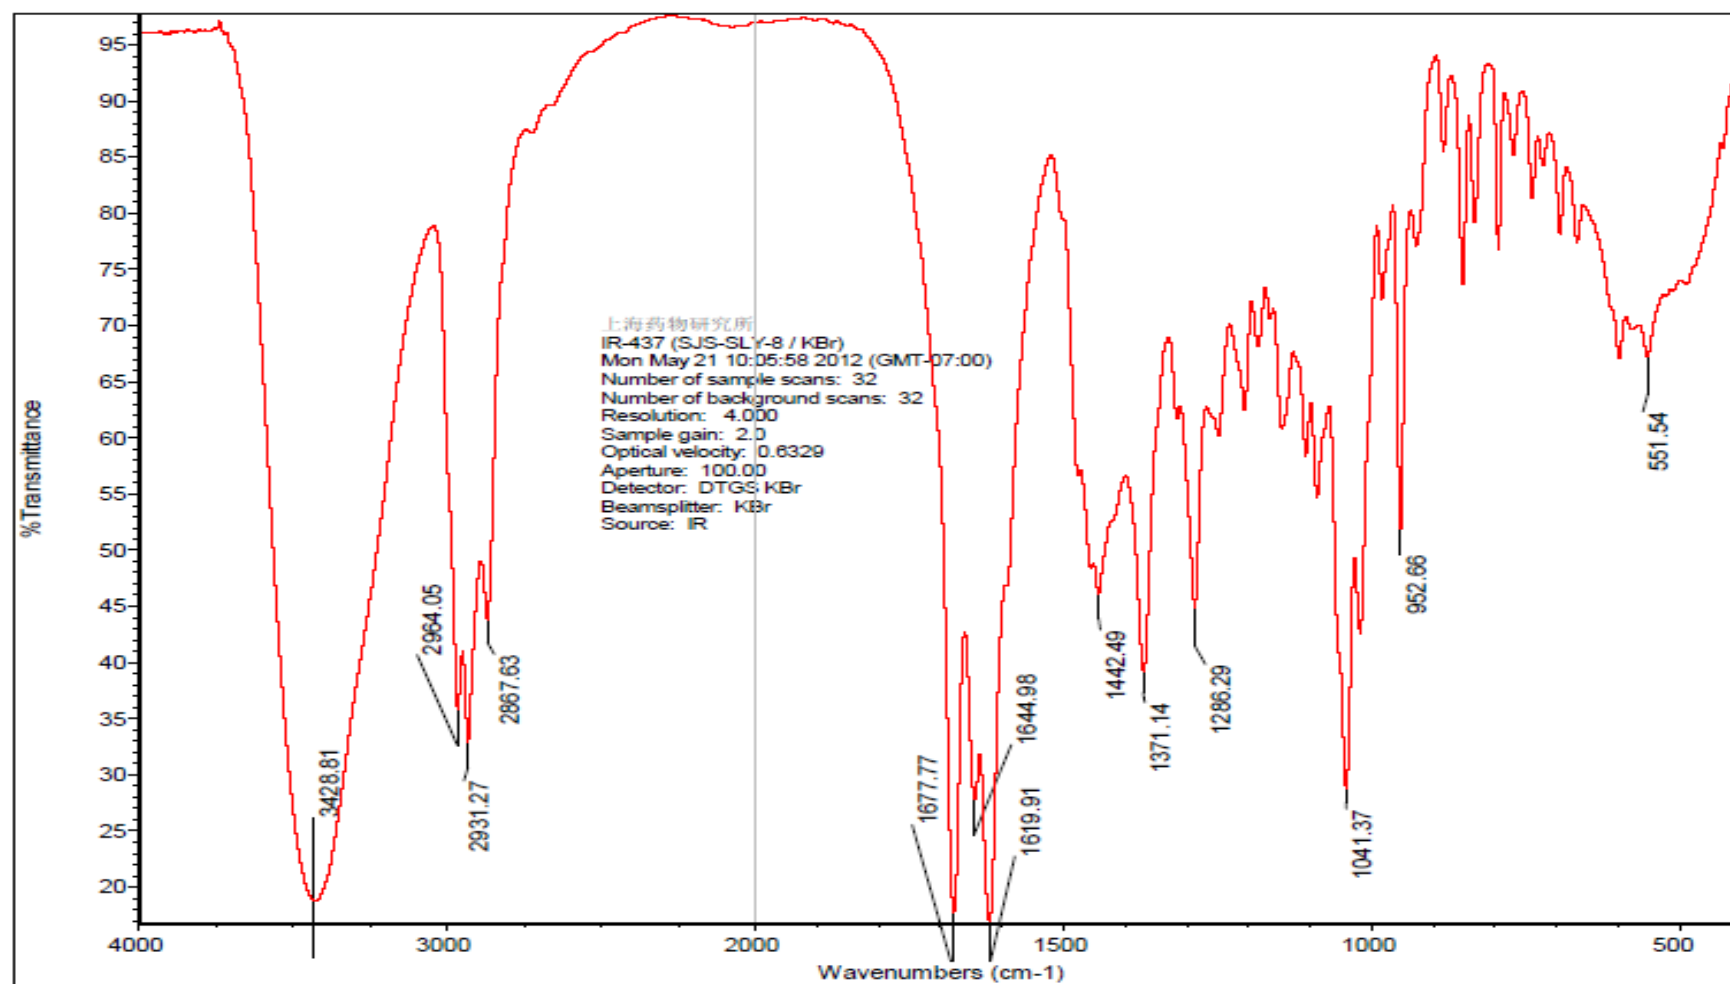

**Figure S11** <sup>1</sup>H NMR of Lanceolatin B (**2**)

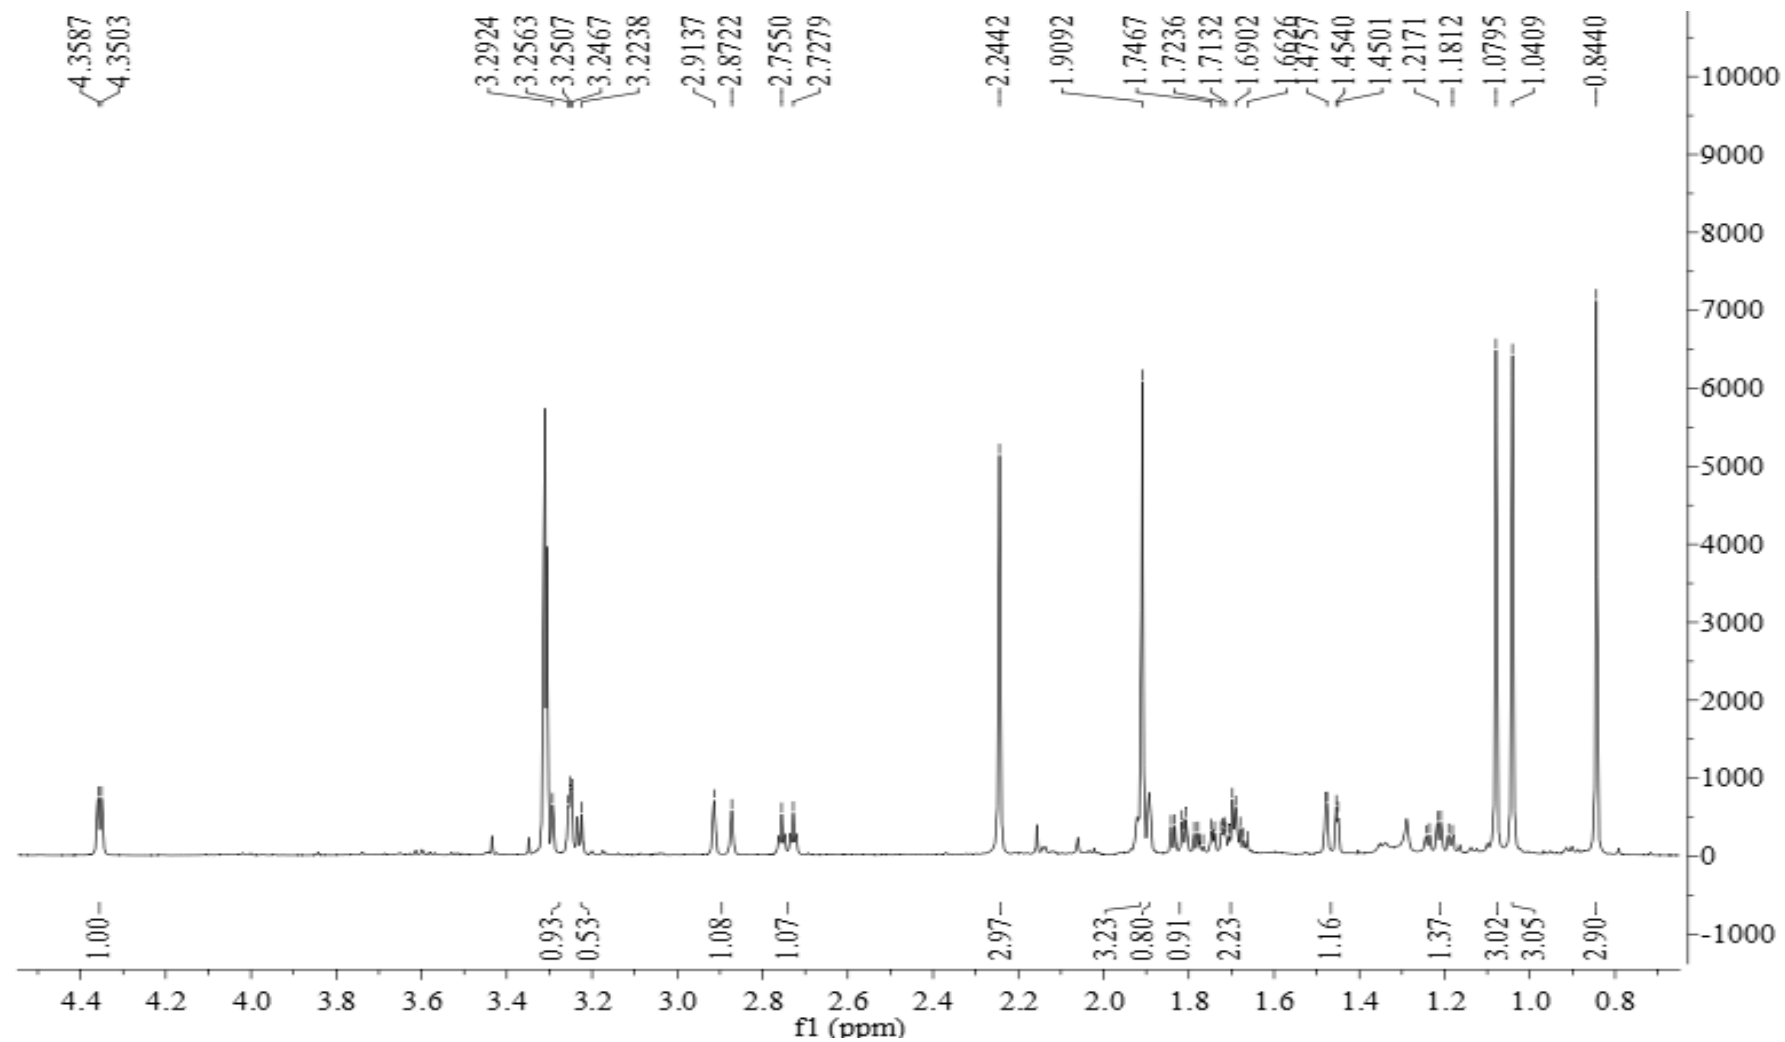

**Figure S12**  $^{13}\text{C}$  NMR of Lanceolatin B (2)

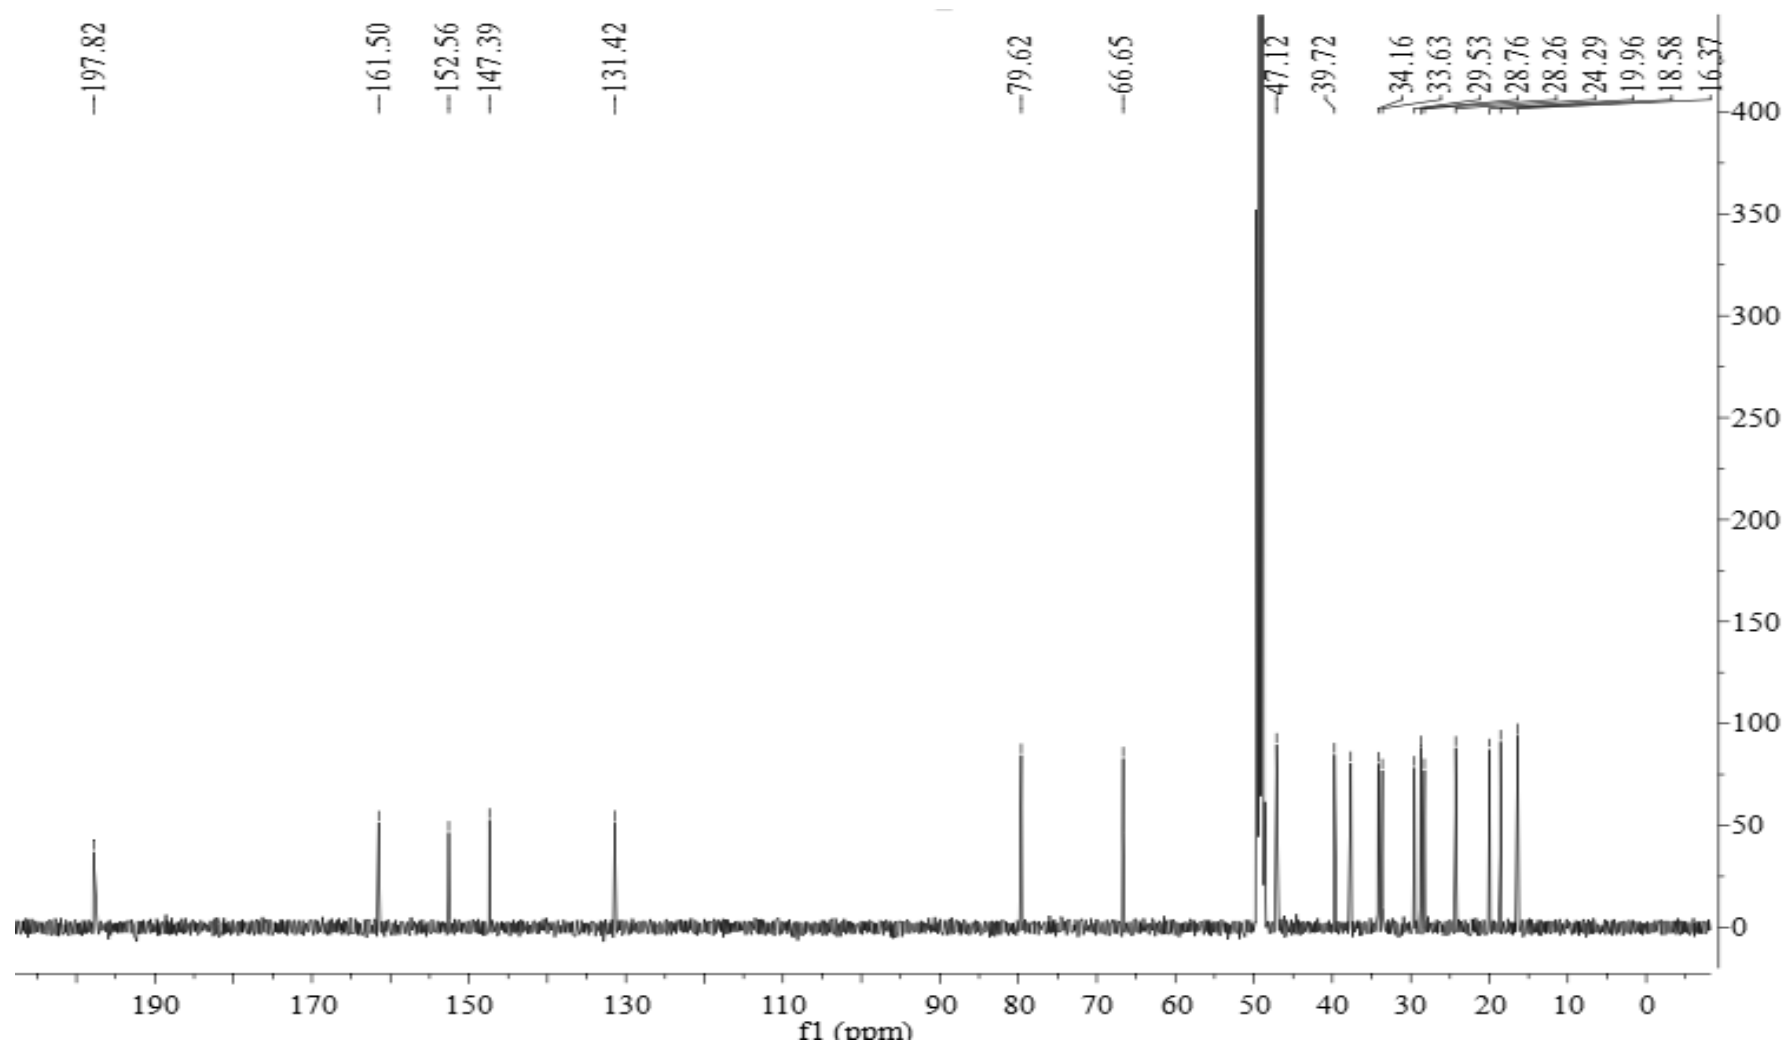

Figure S13 DEPT of Lanceolatin B (2)

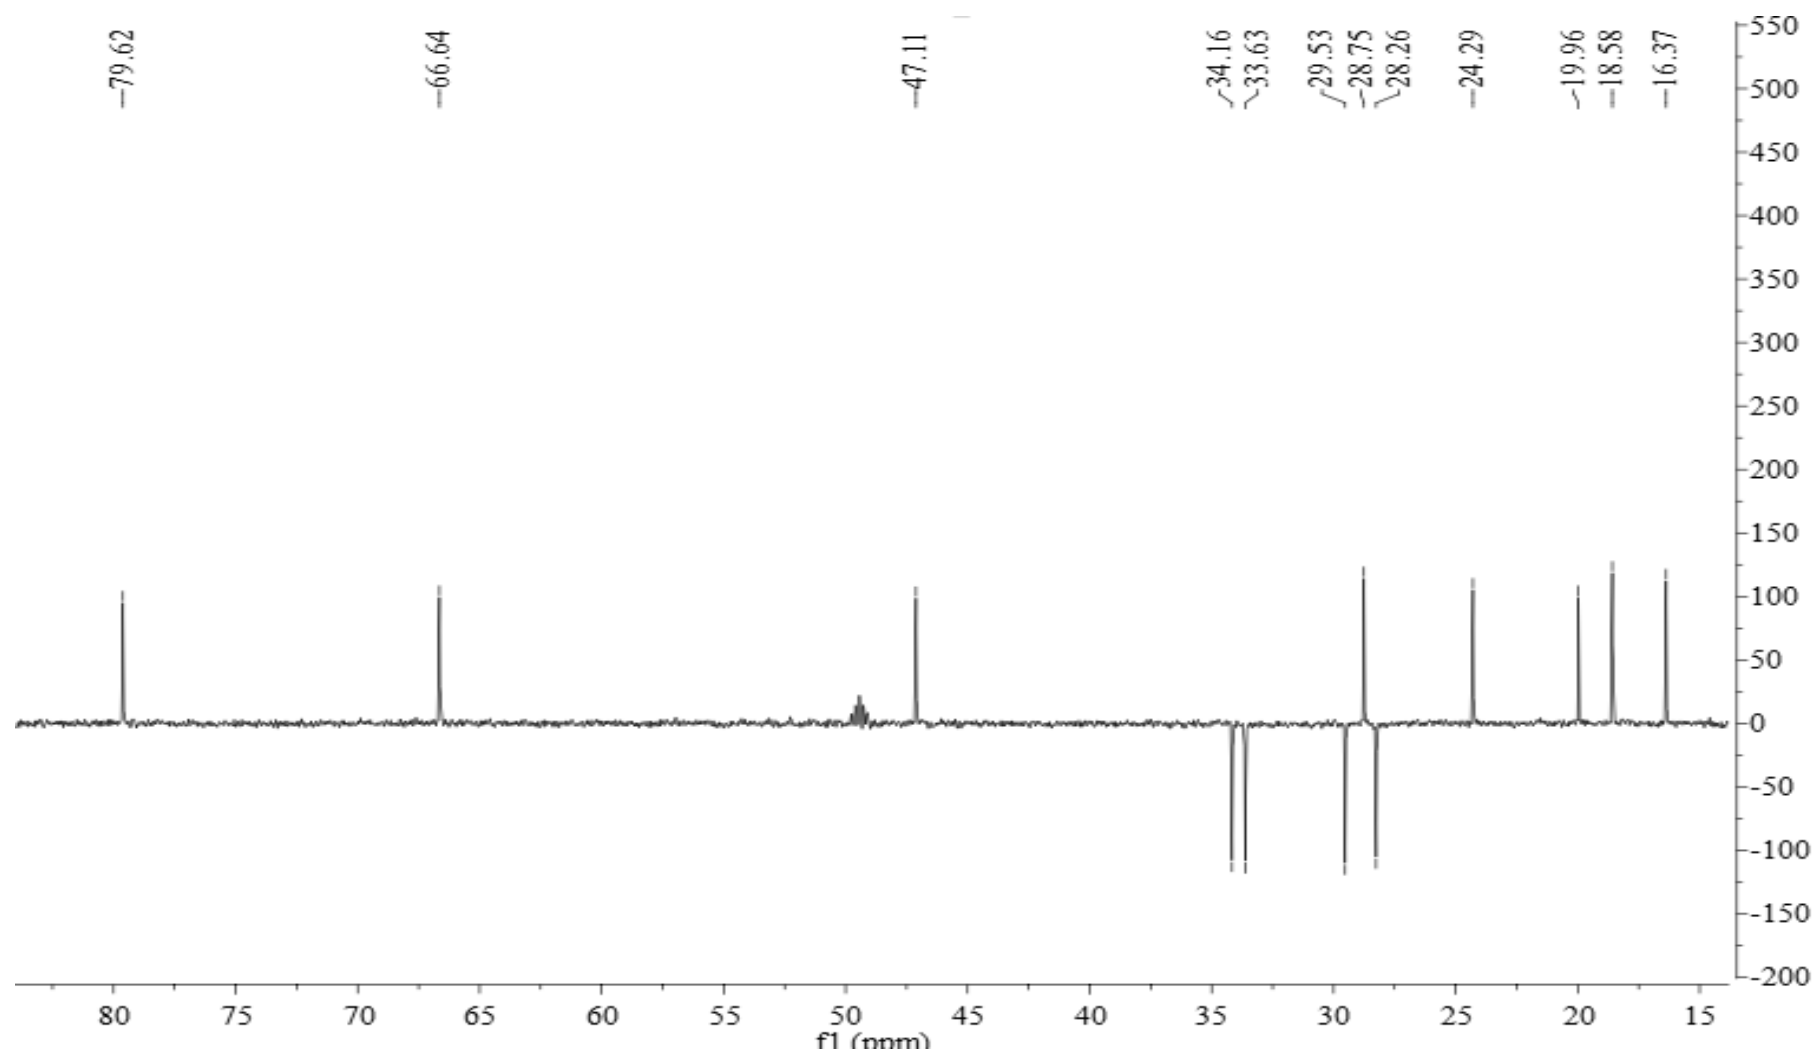

**Figure S14** HMQC of Lanceolatin B (2)



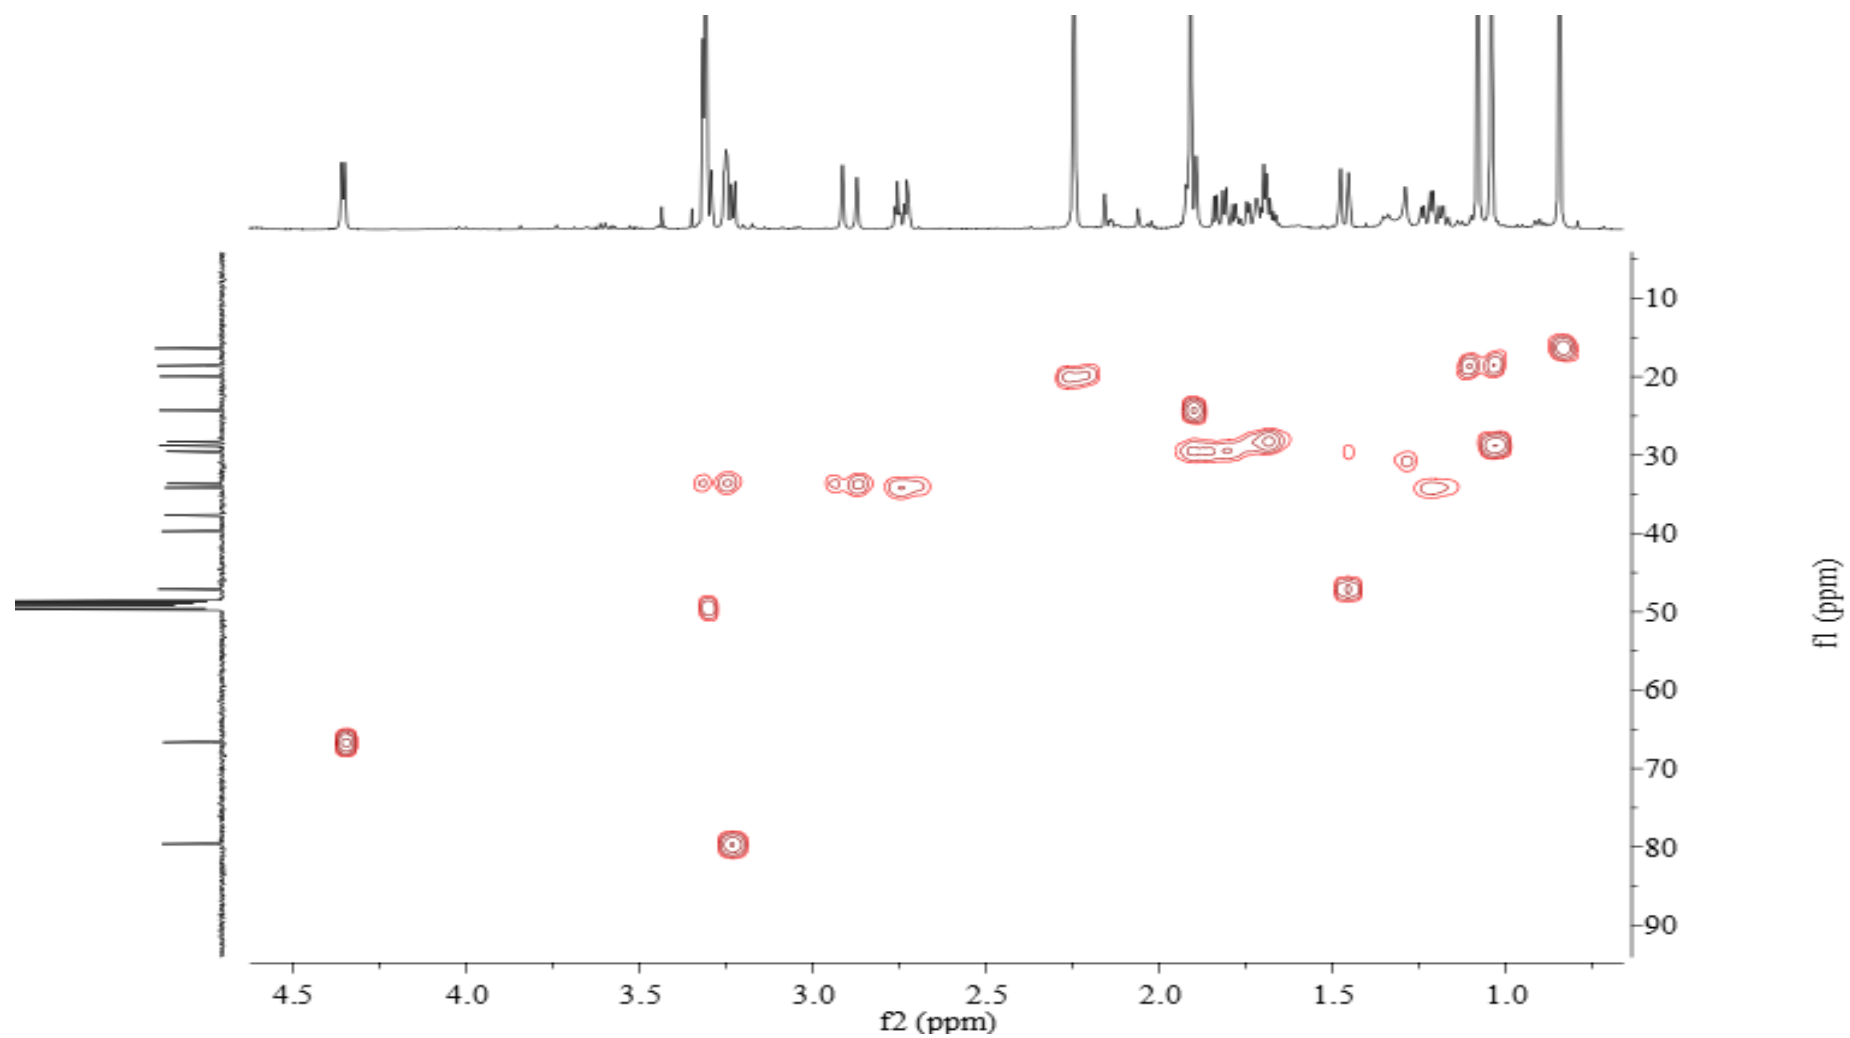

**Figure S15** HMBC of Lanceolatin B (**2**)

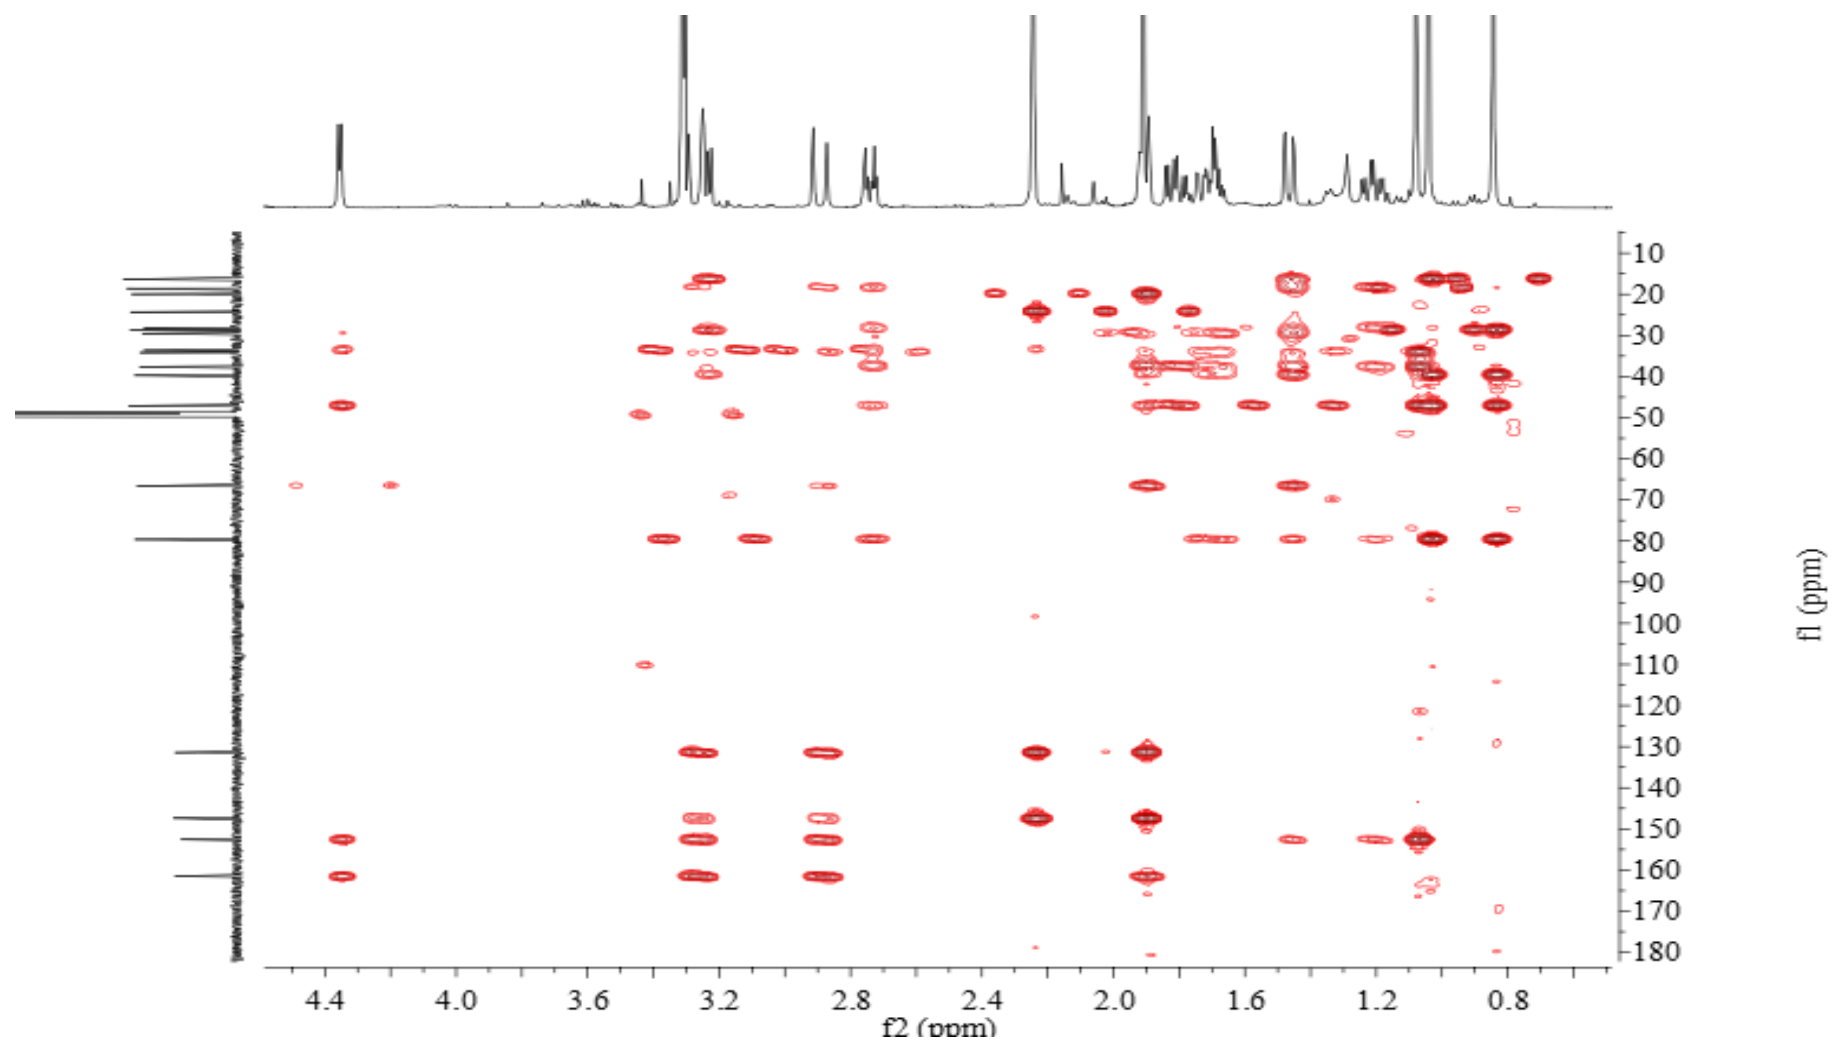

**Figure S16** NOSEY of Lanceolatin B (2)

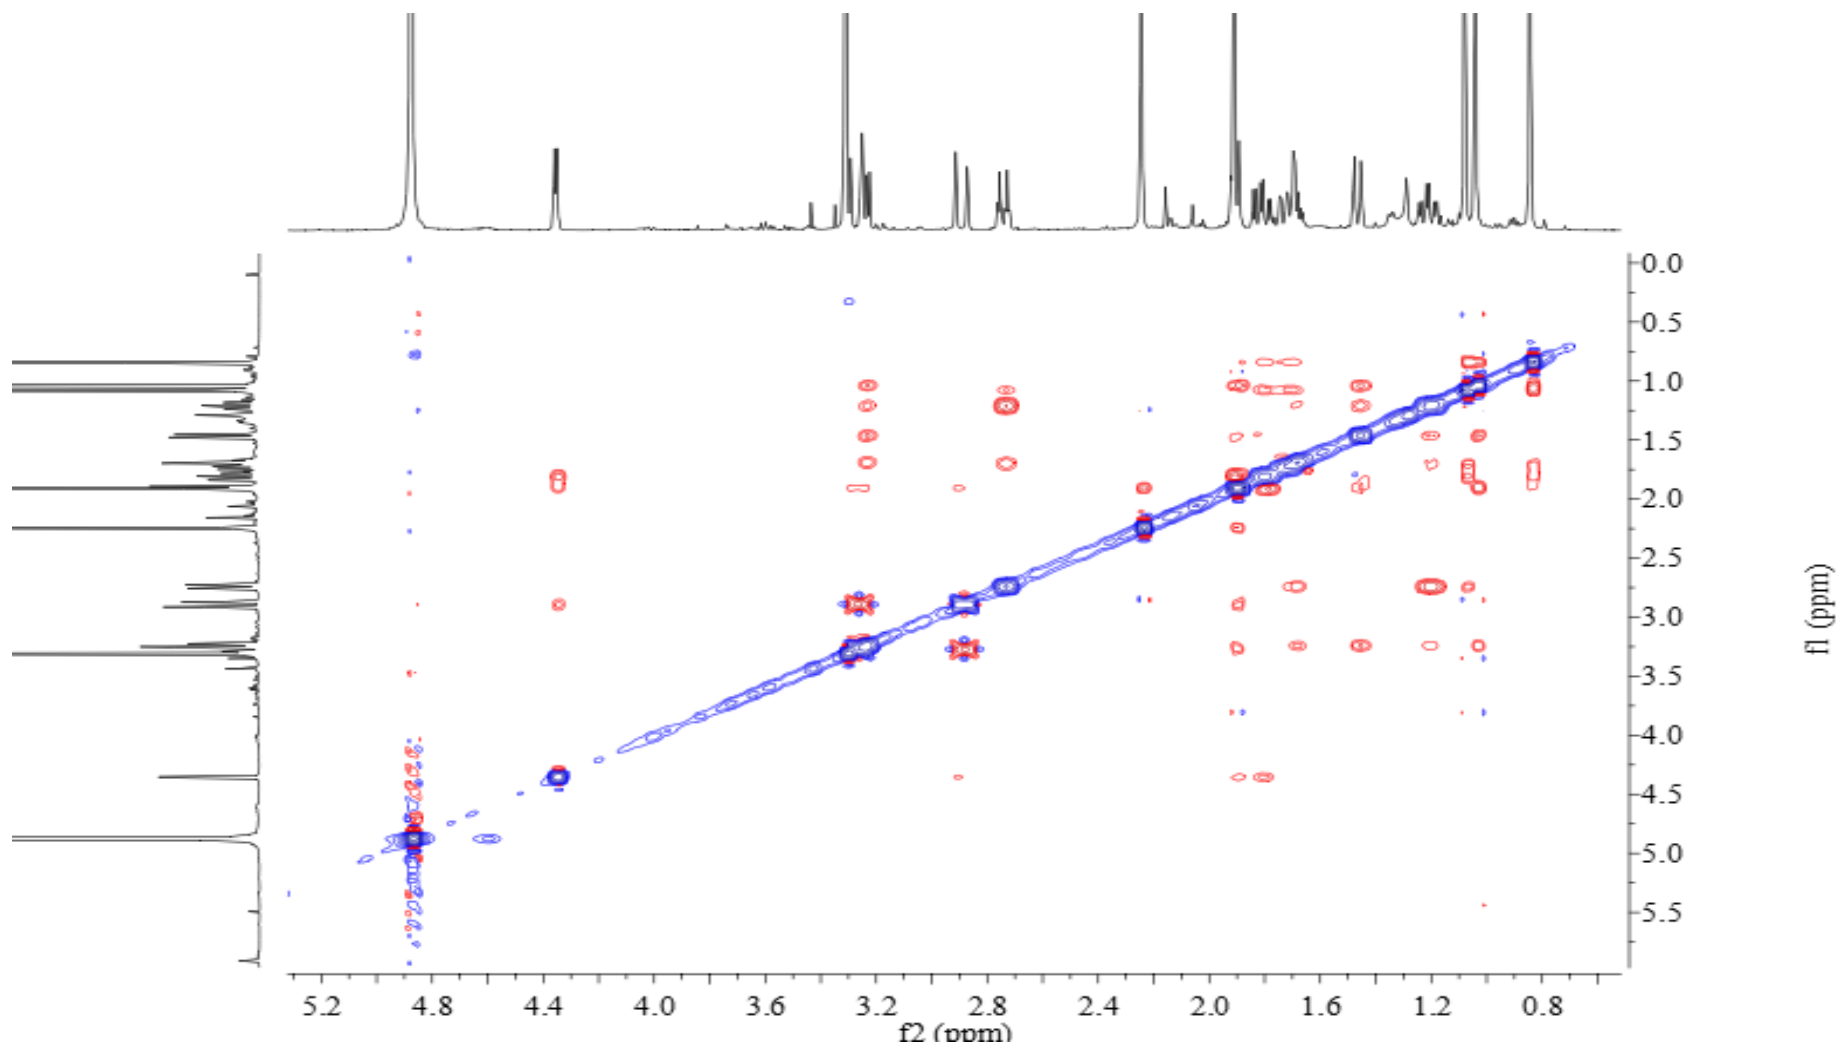

Lanceolatin C (3)

**Figure S17** HR-ESI-MS of Lanceolatin C

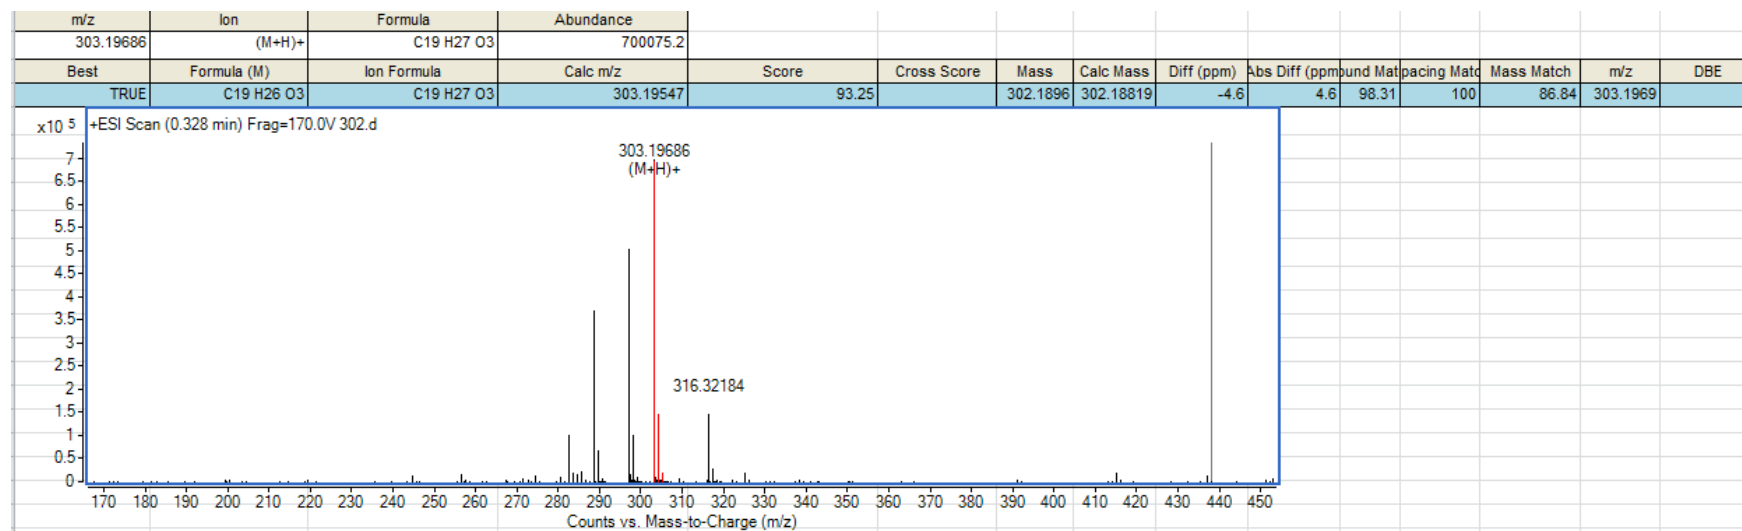

**Figure S18** IR(KBr) of Lanceolatin C (3)

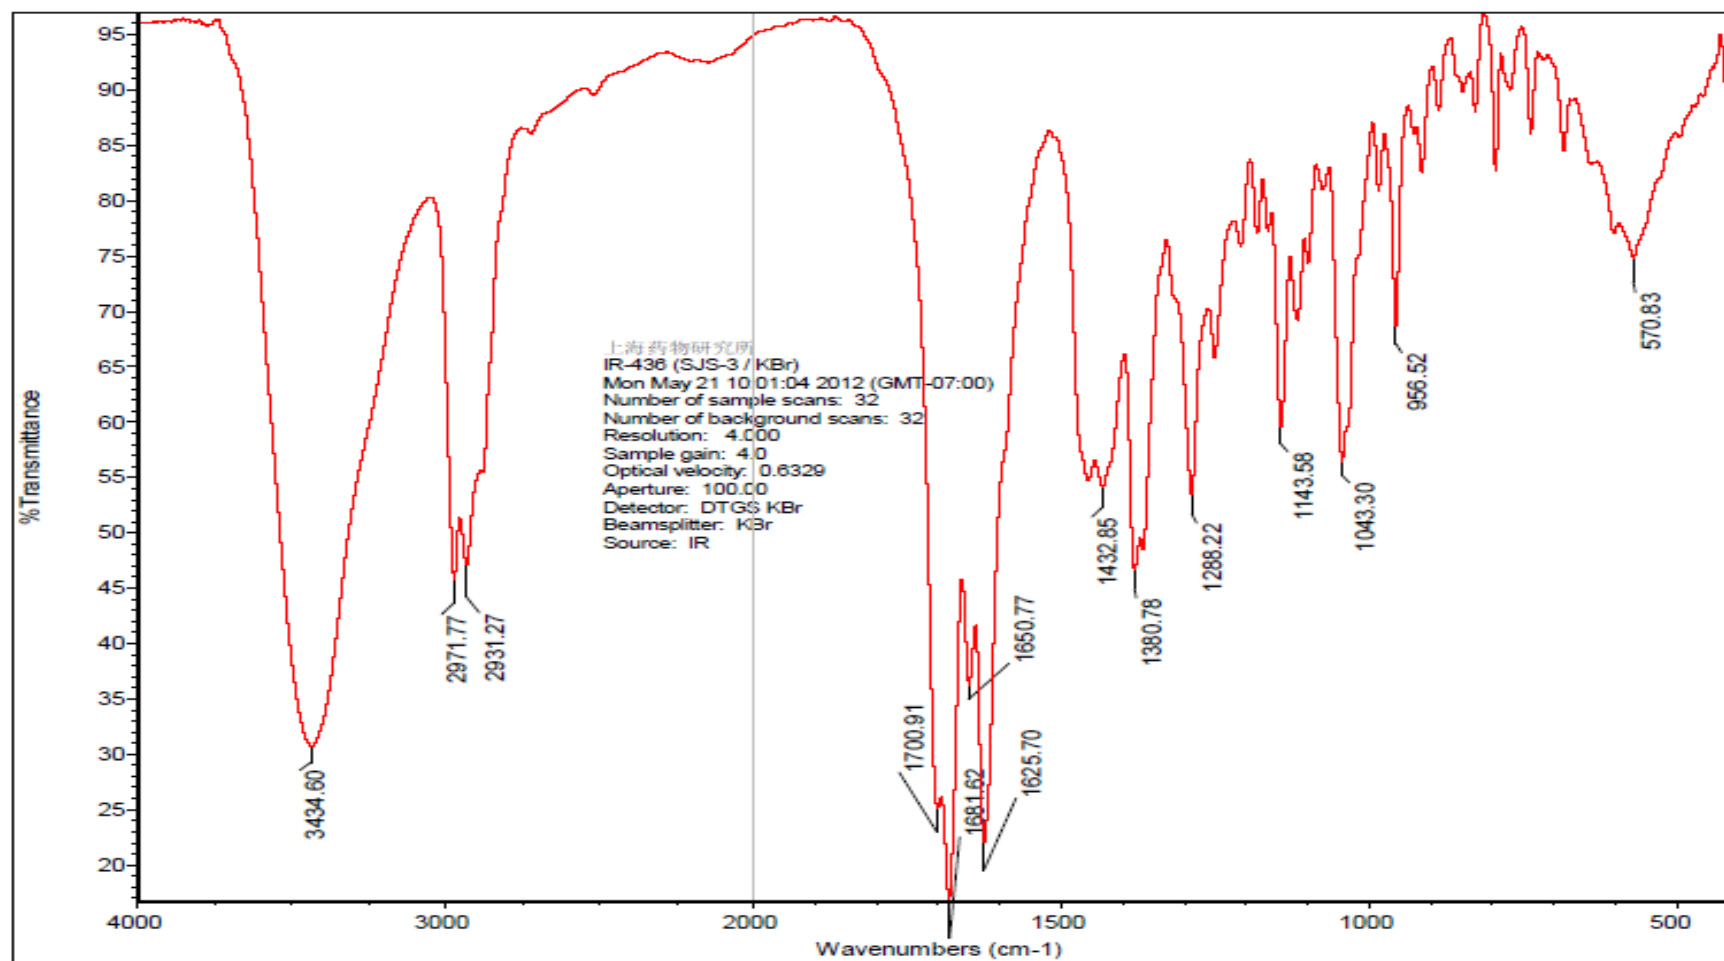

**Figure S19** <sup>1</sup>H NMR of Lanceolatin C (3)

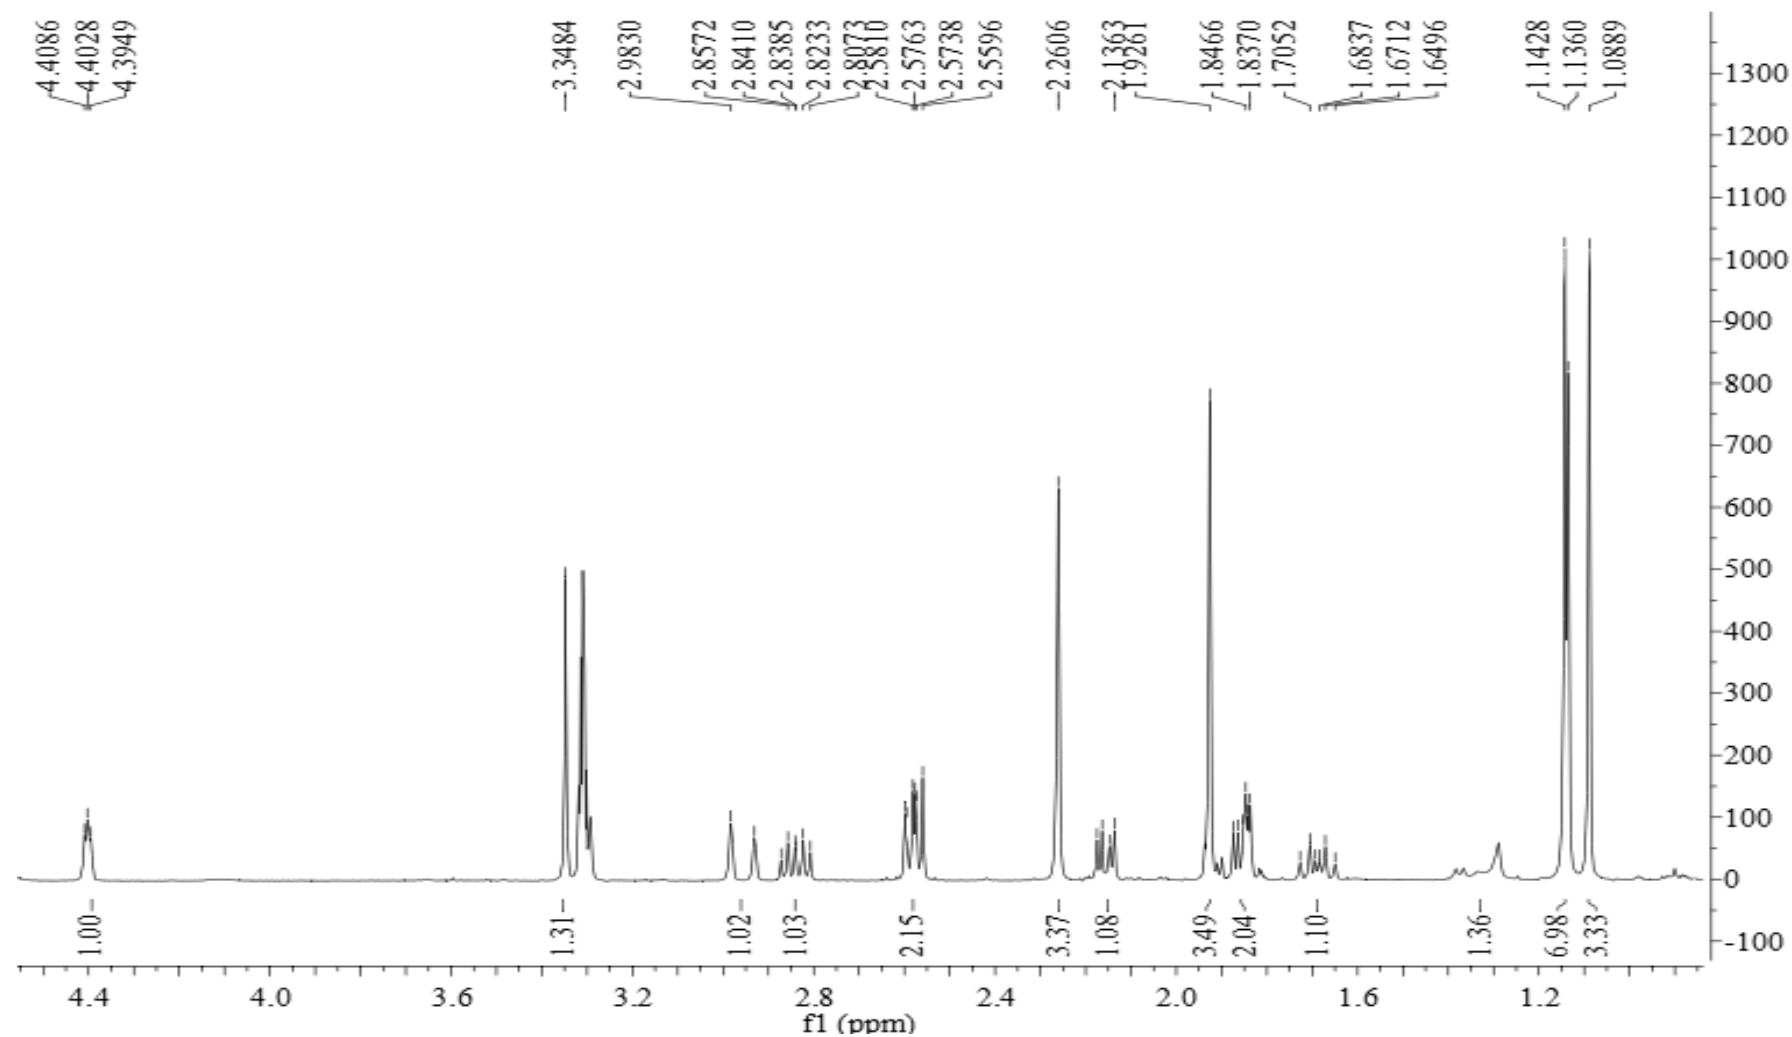

**Figure S20**  $^{13}\text{C}$  NMR of Lanceolatin C (3)

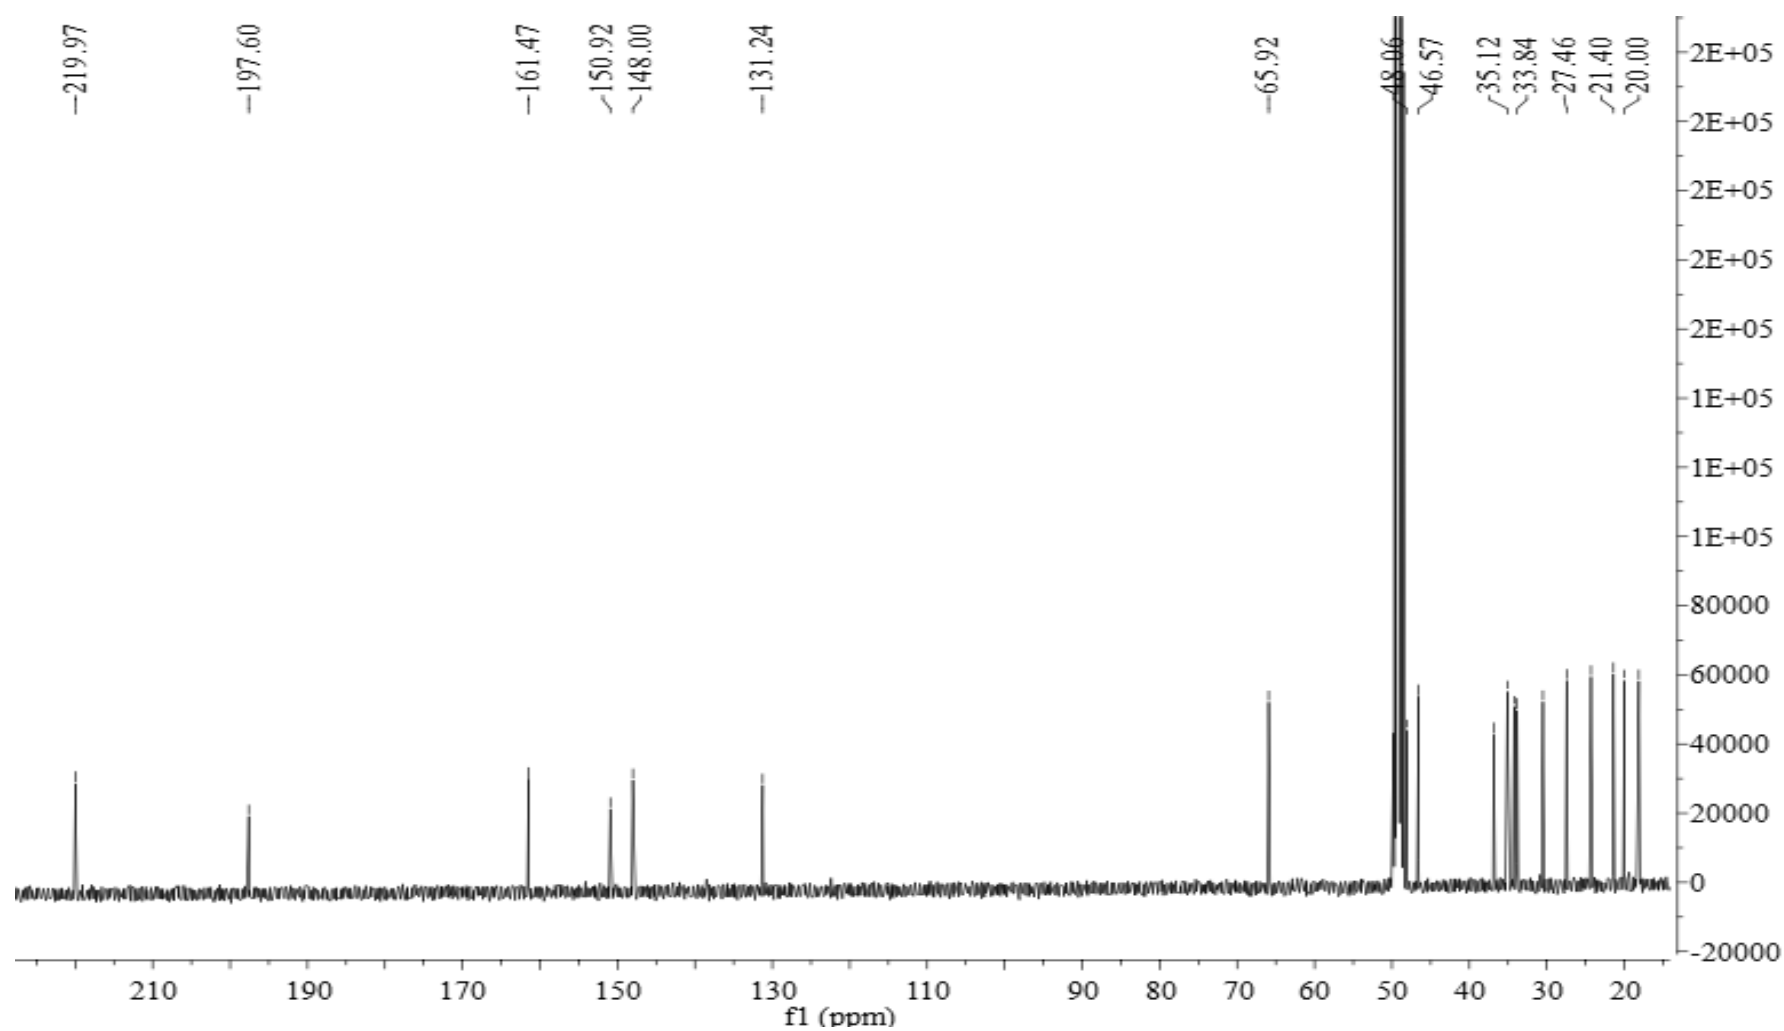

Figure S21 DEPT of Lanceolatin C (3)

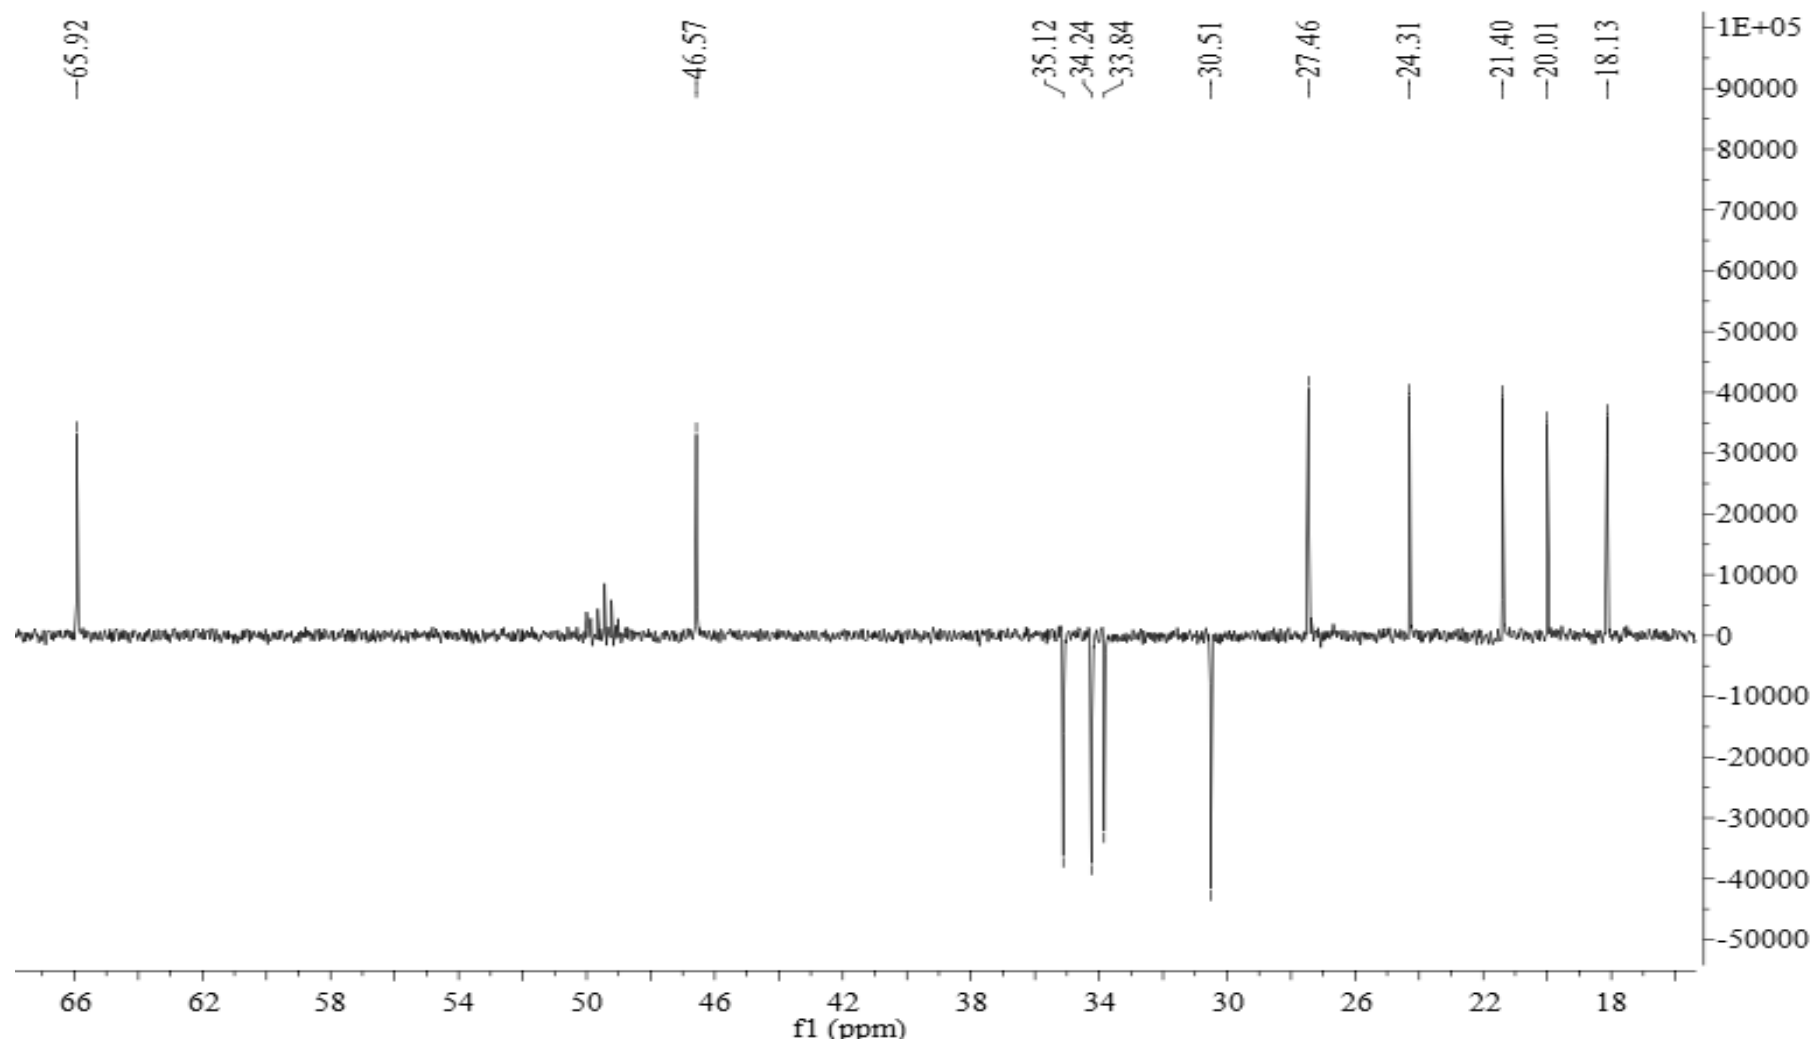

**Figure S22** HMQC of Lanceolatin C (3)



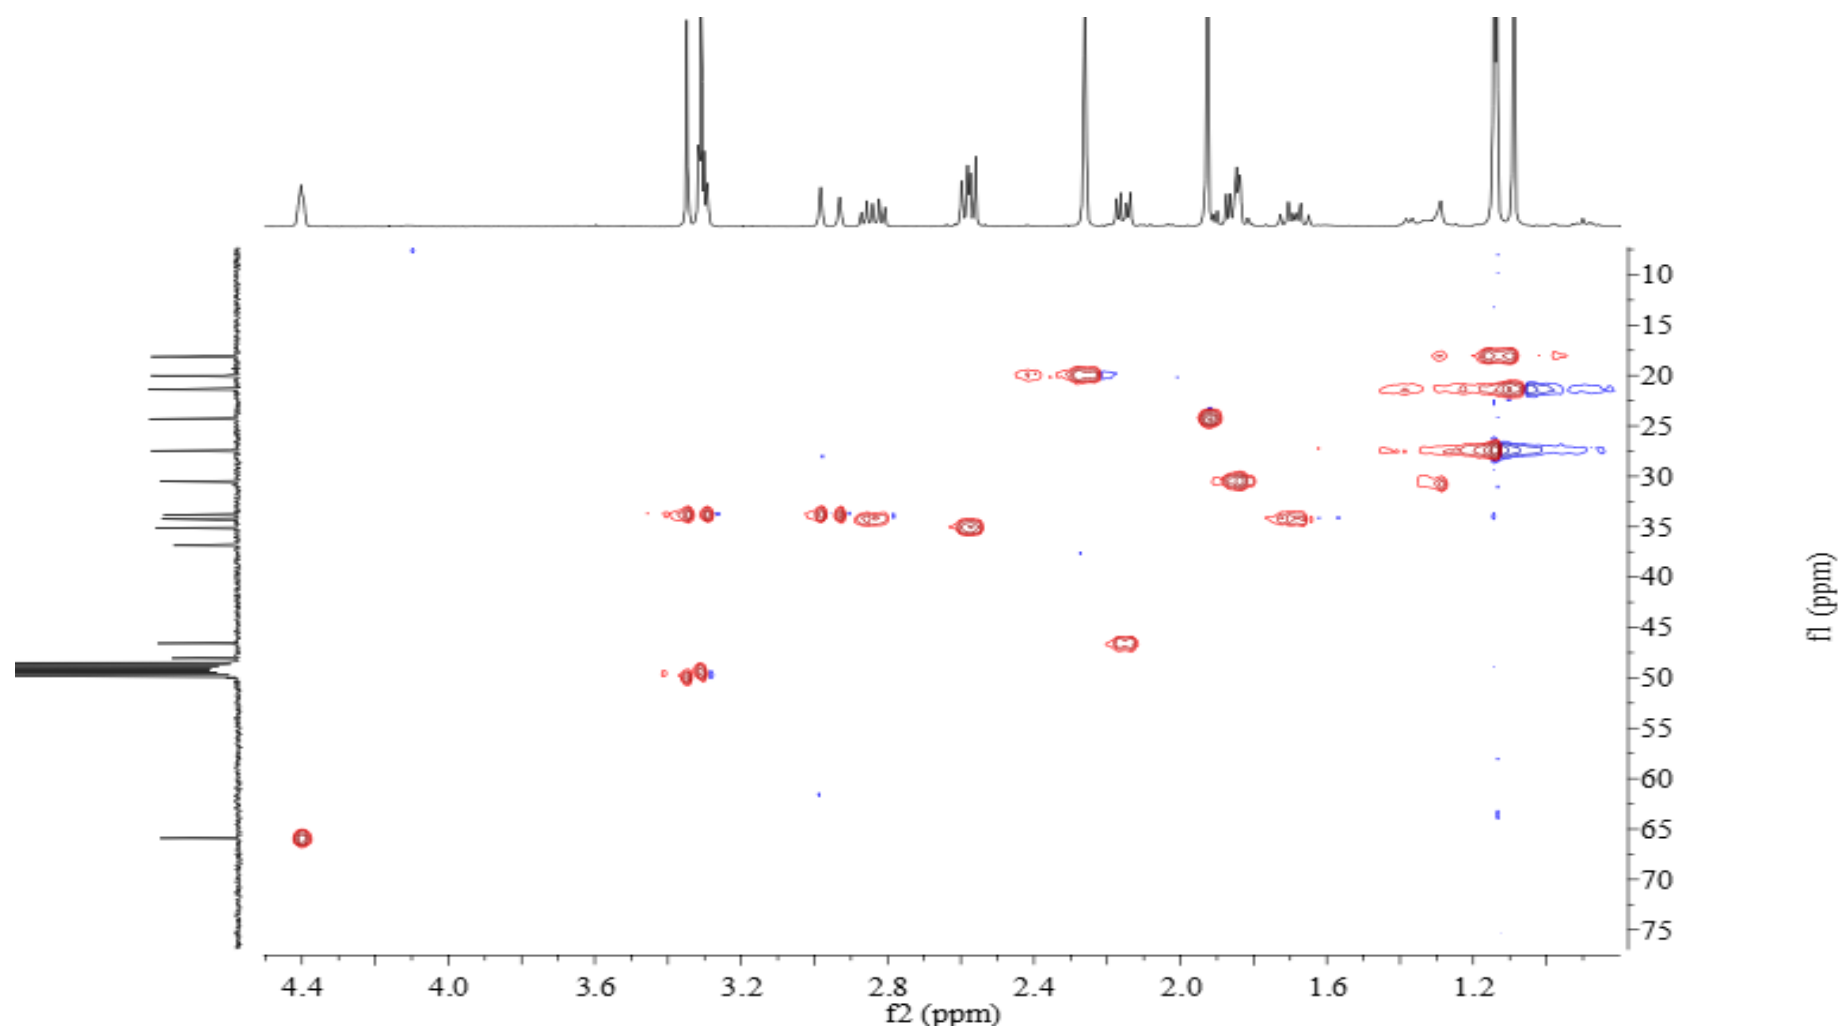

**Figure S23** HMBC of Lanceolatin C (**3**)

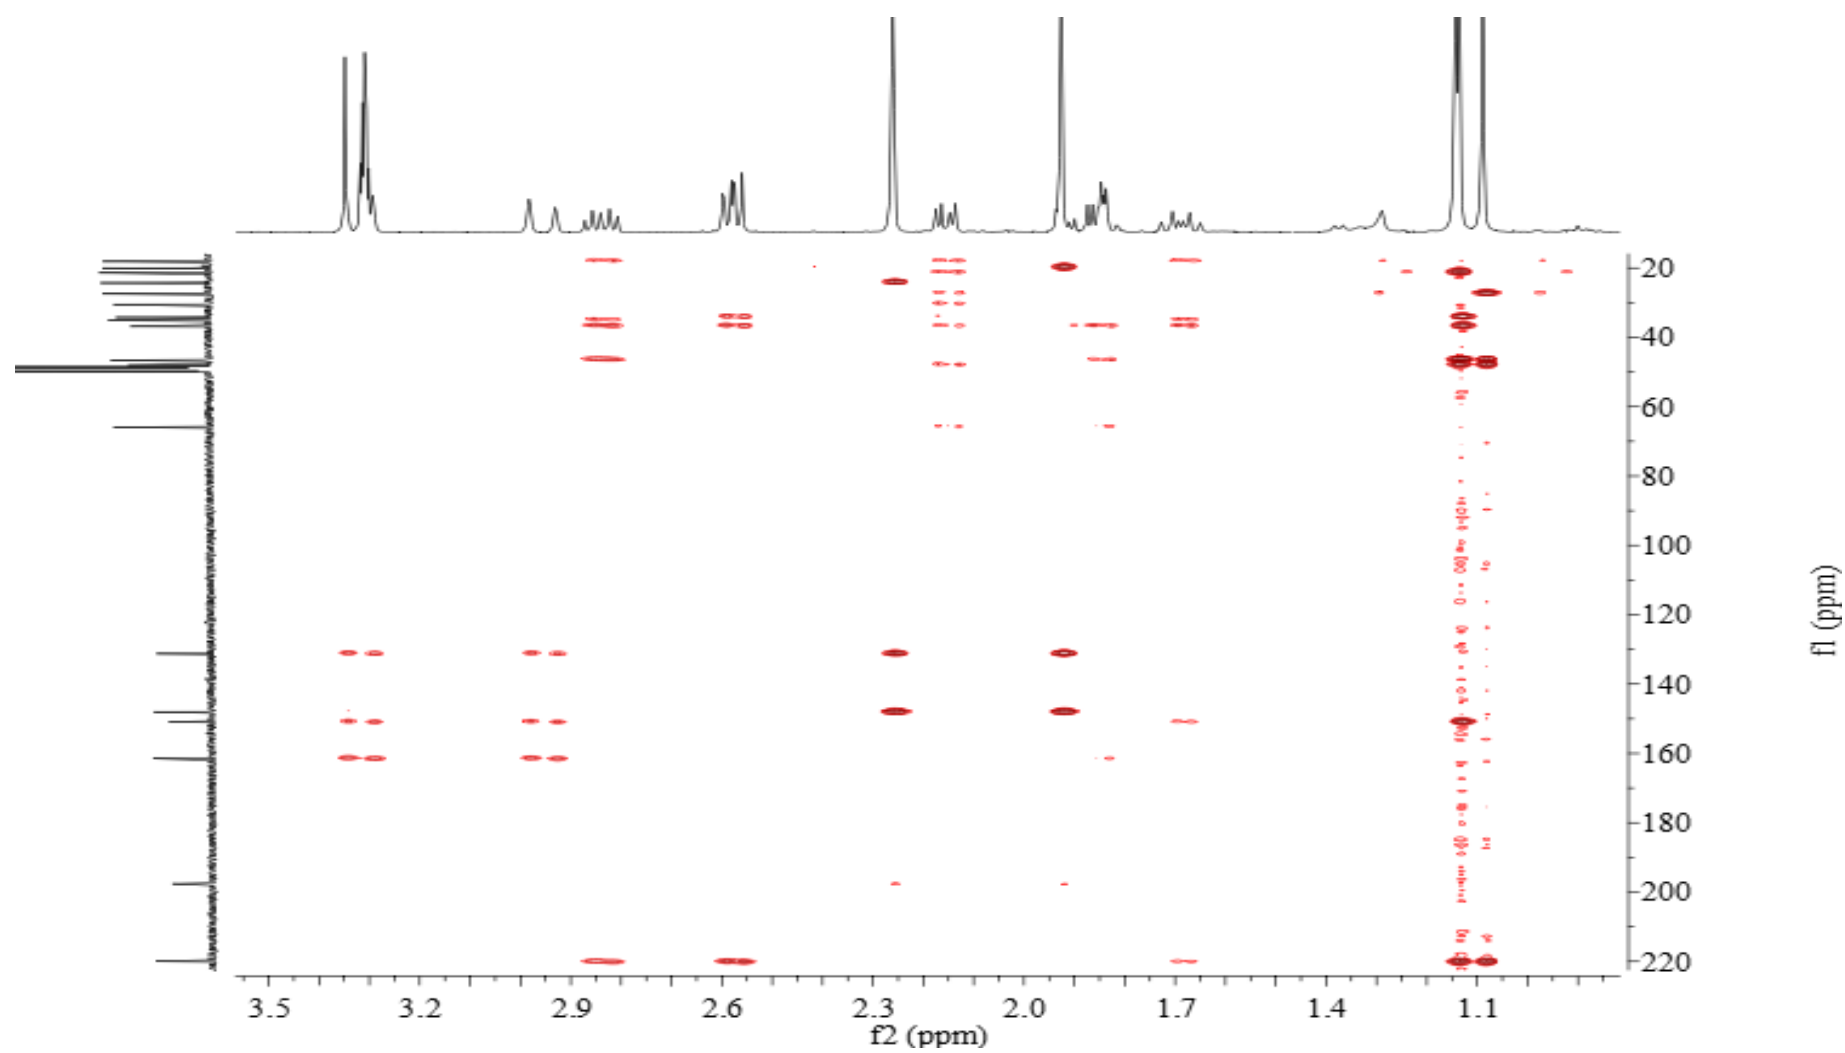

**Figure S24** NOSEY of Lanceolatin C (**3**)

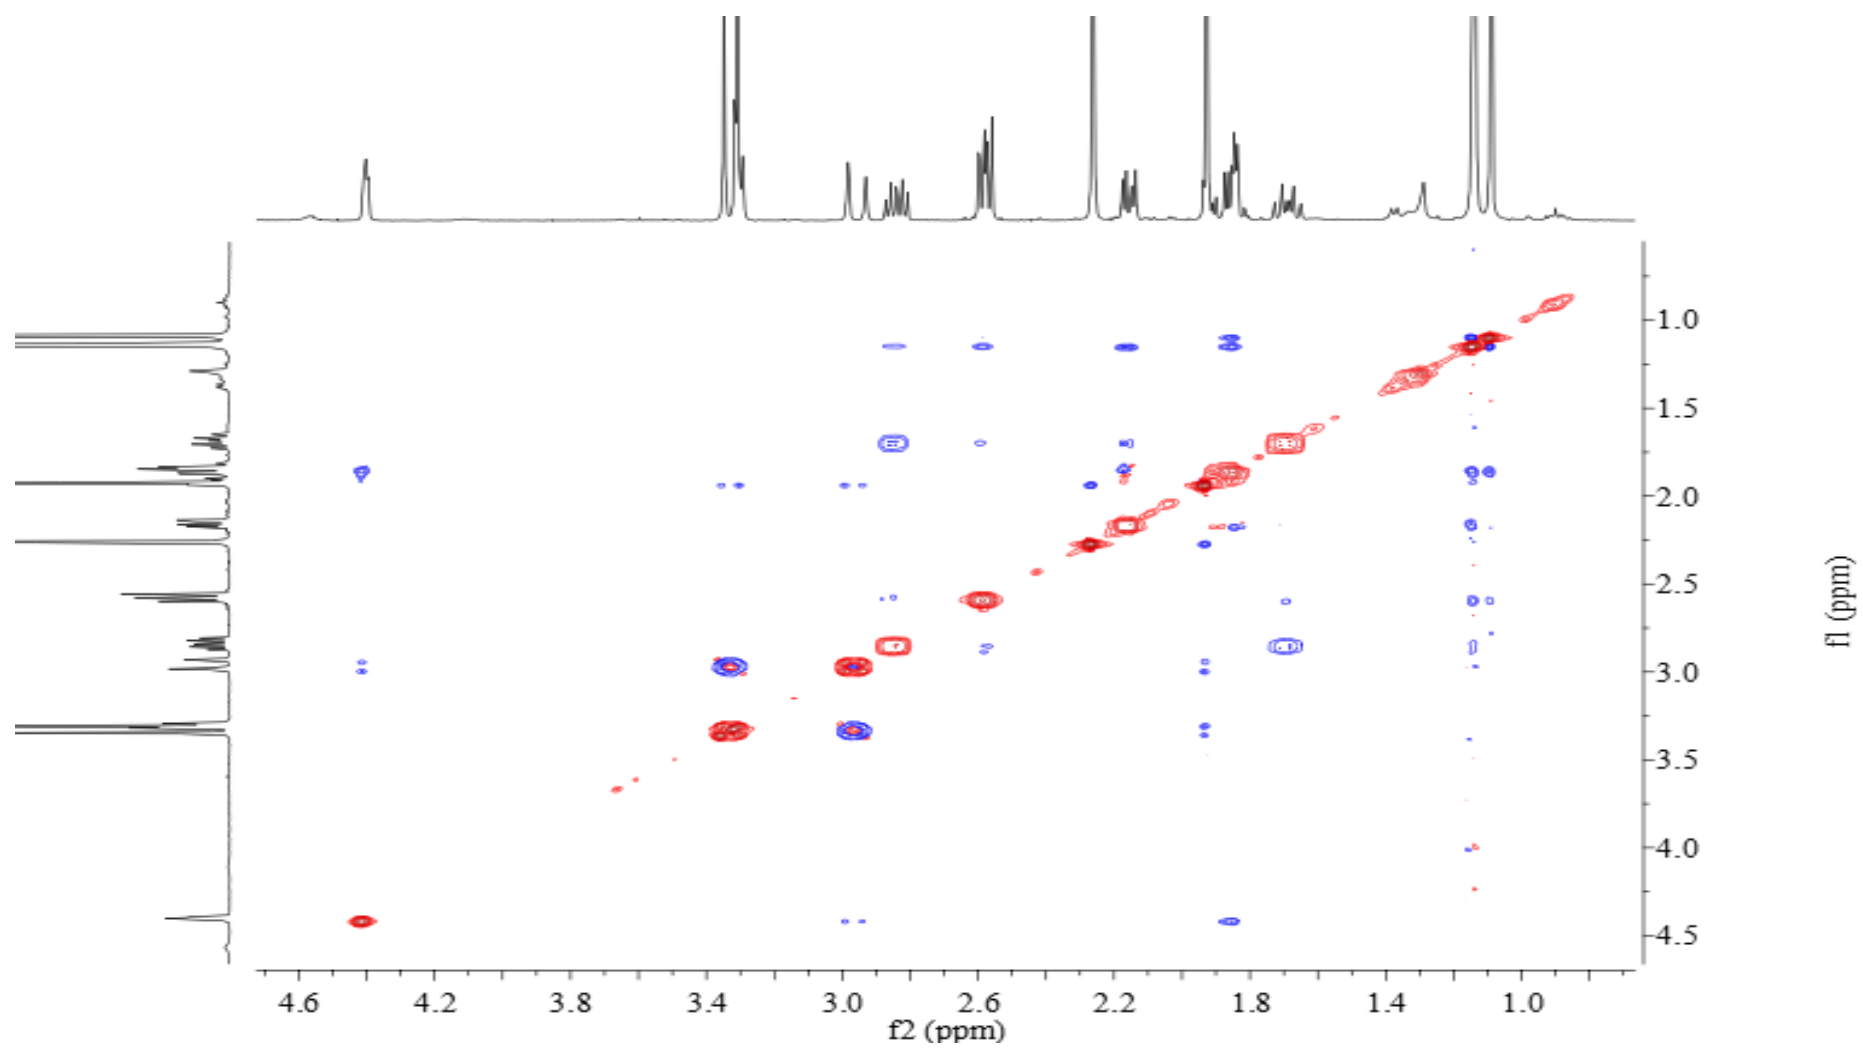

Lanceolatin D (4)

**Figure S25** HR-ESI-MS of Lanceolatin D

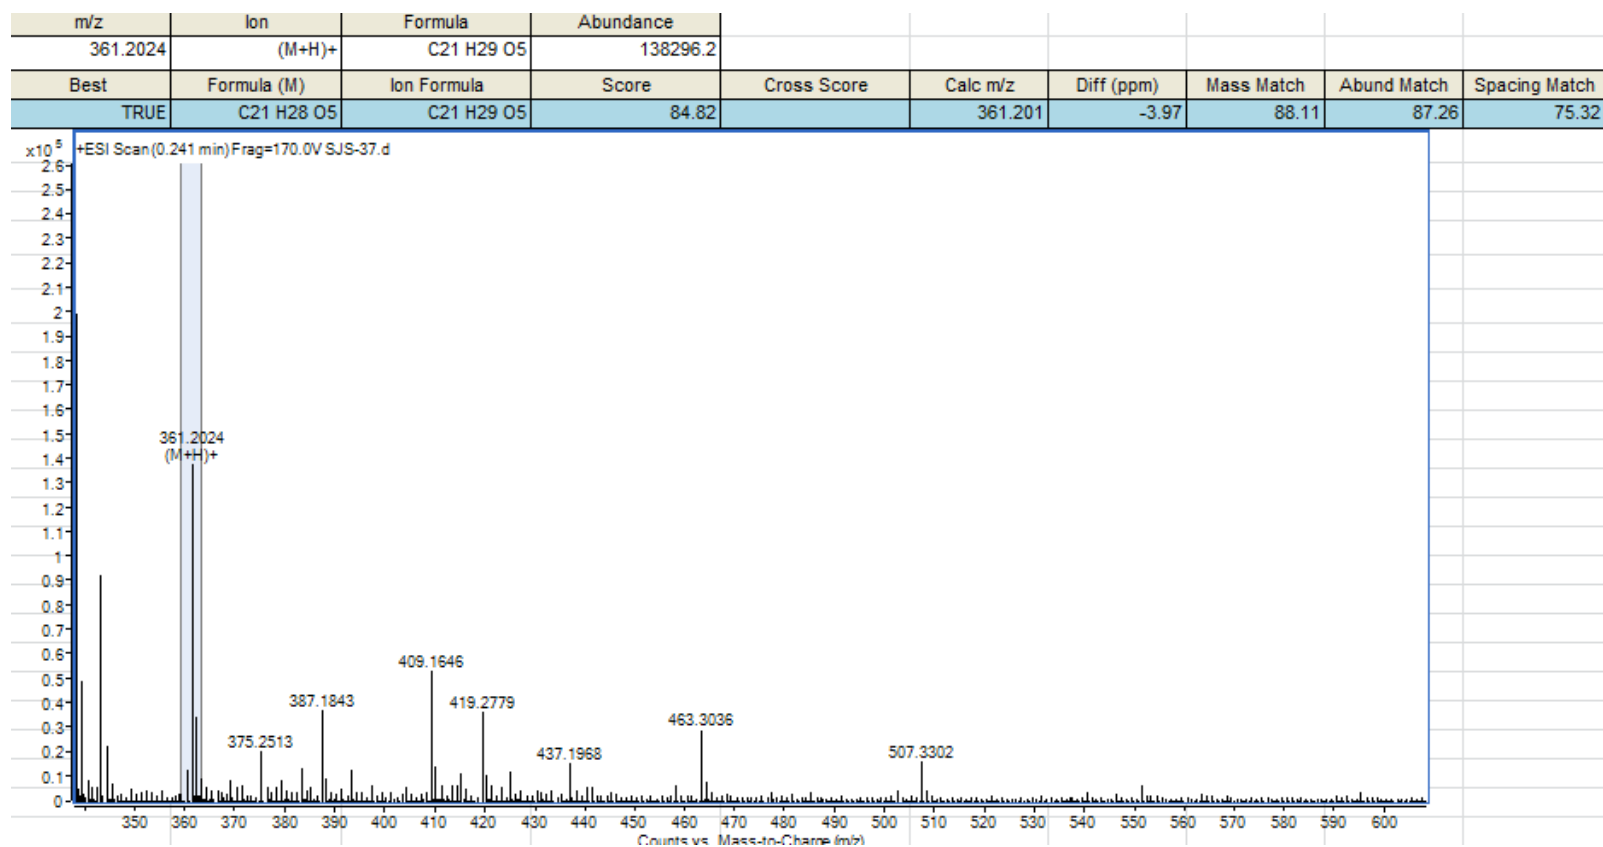

**Figure S26** IR(KBr) of Lanceolatin D (4)

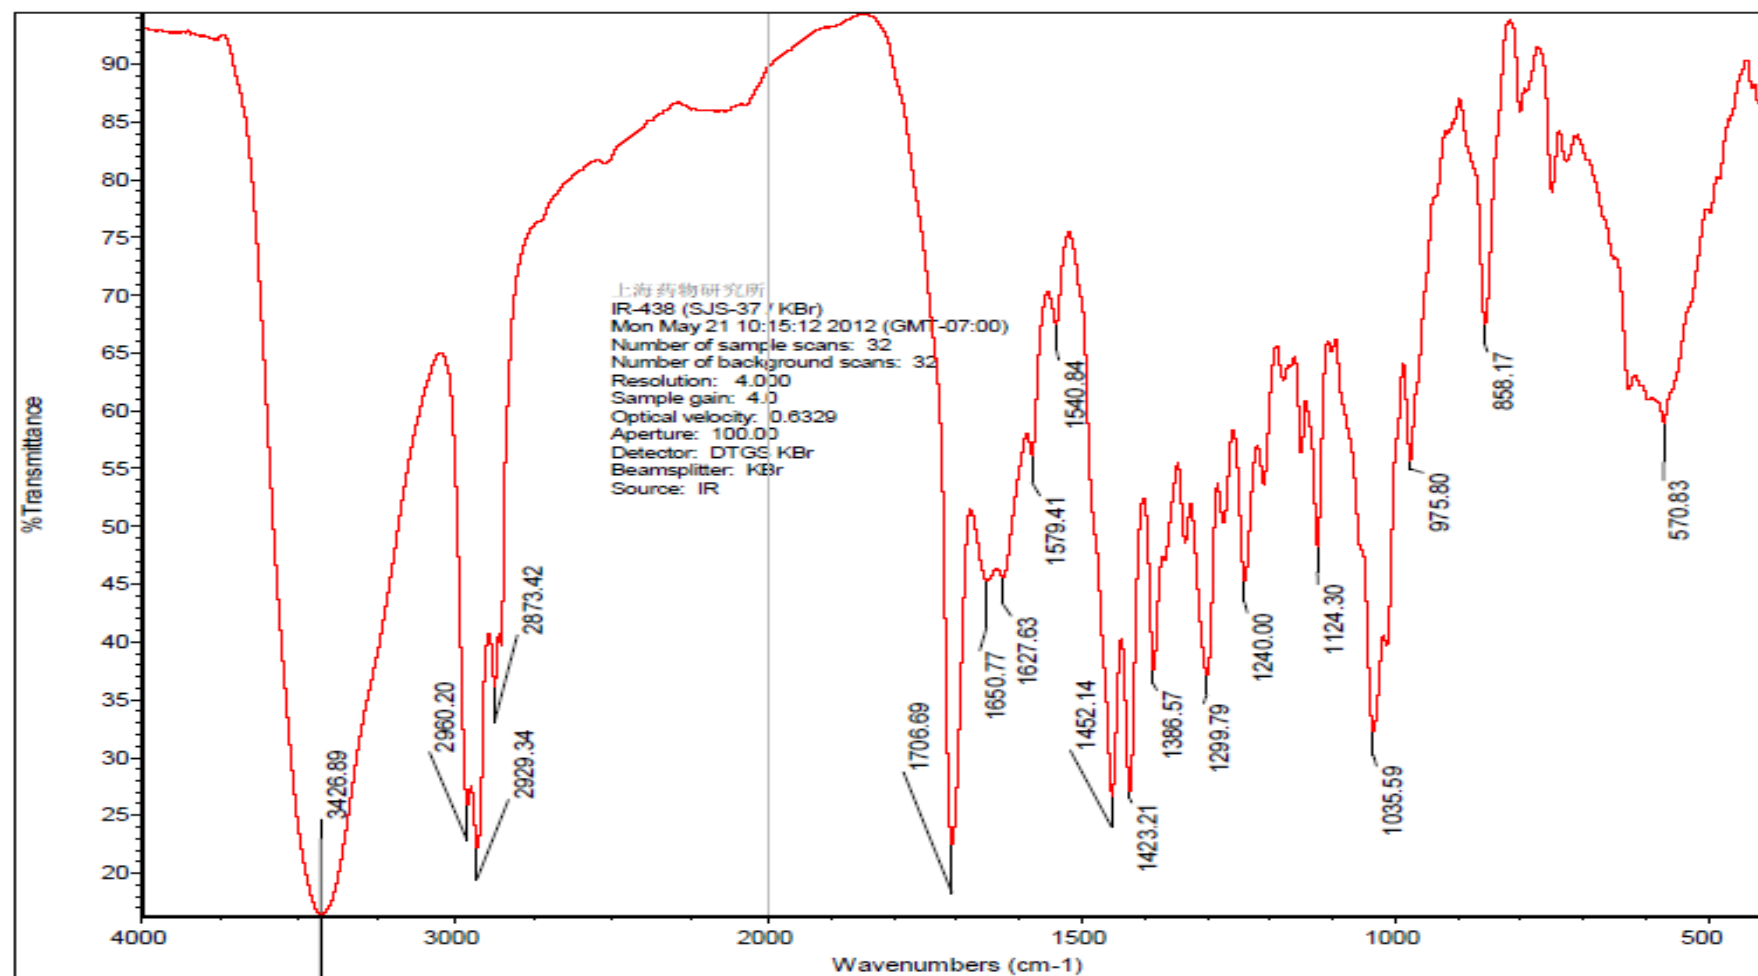

Figure S27  $^1\text{H}$  NMR of Lanceolatin D (4)



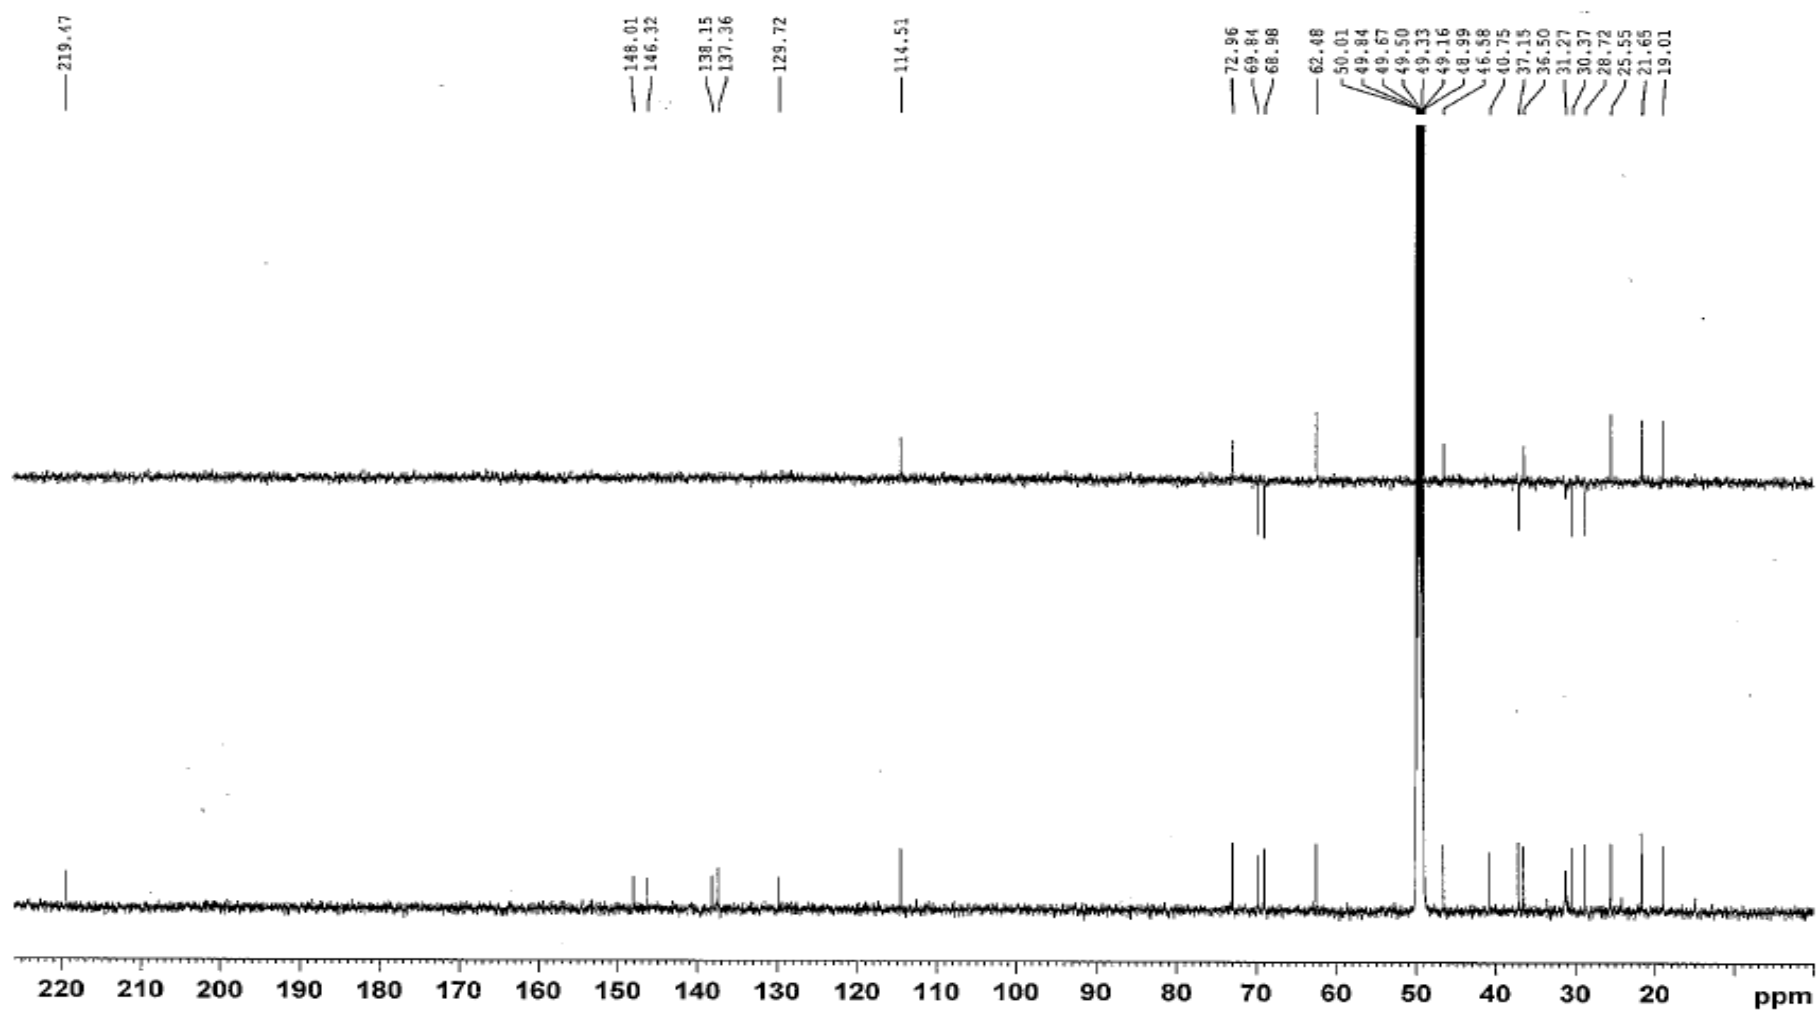

Figure S29 HMQC of Lanceolatin D (4)





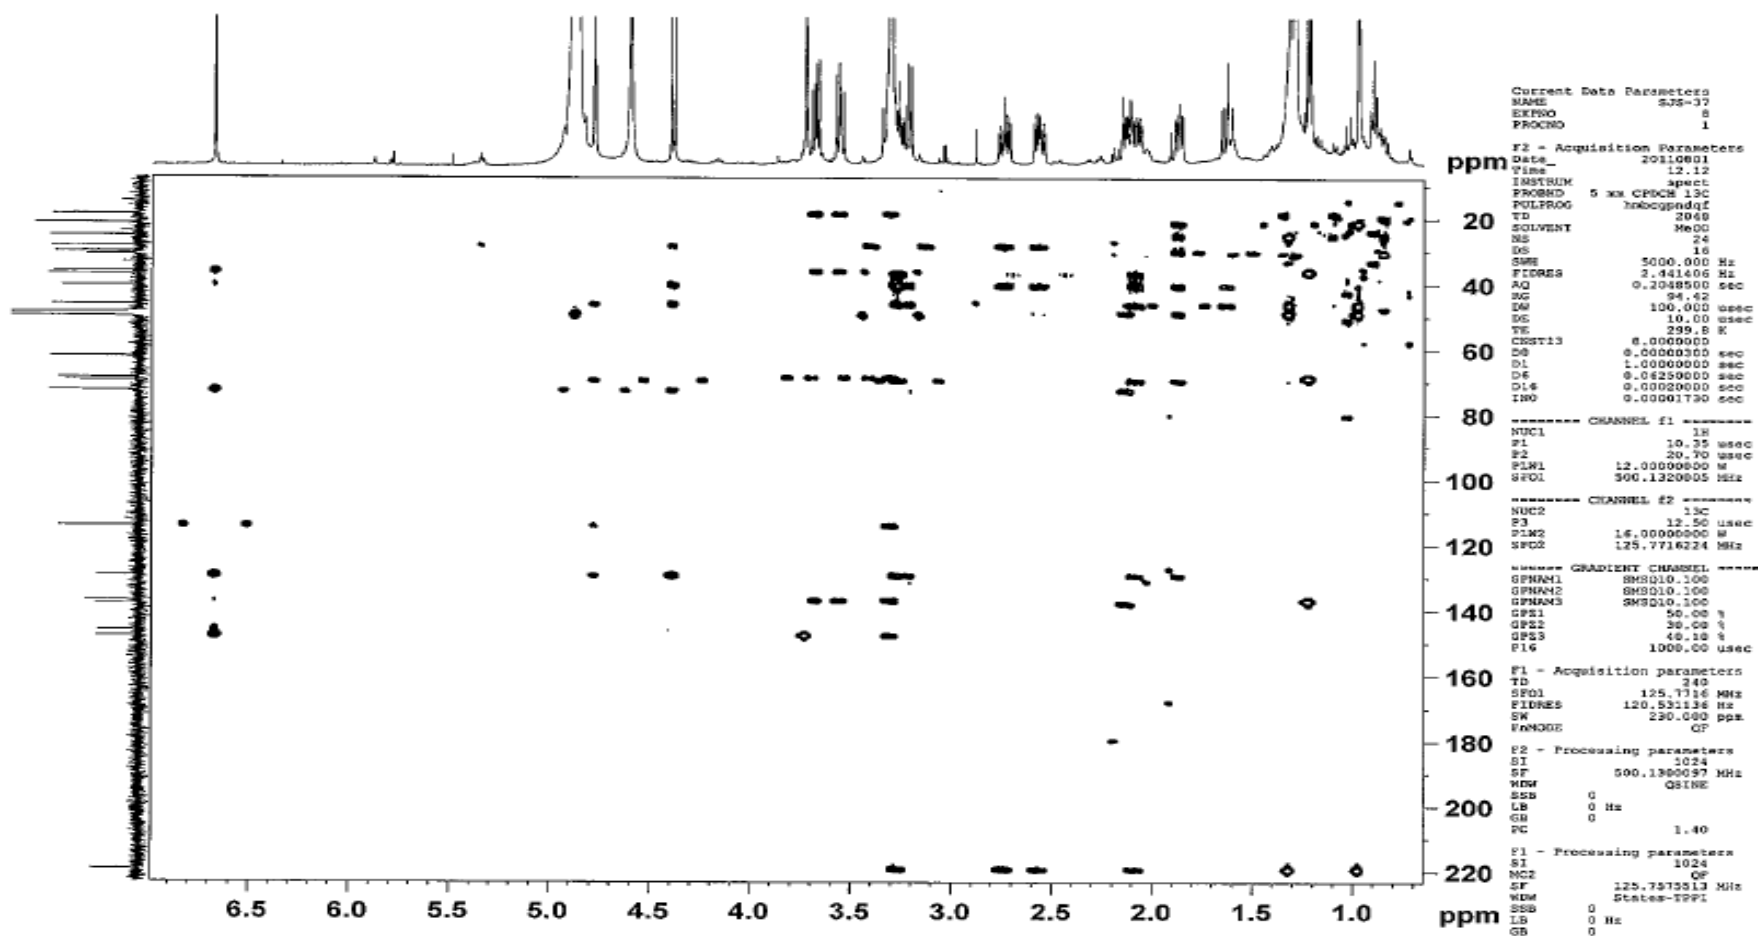

Figure S31 NOSEY of Lanceolatin D (4)

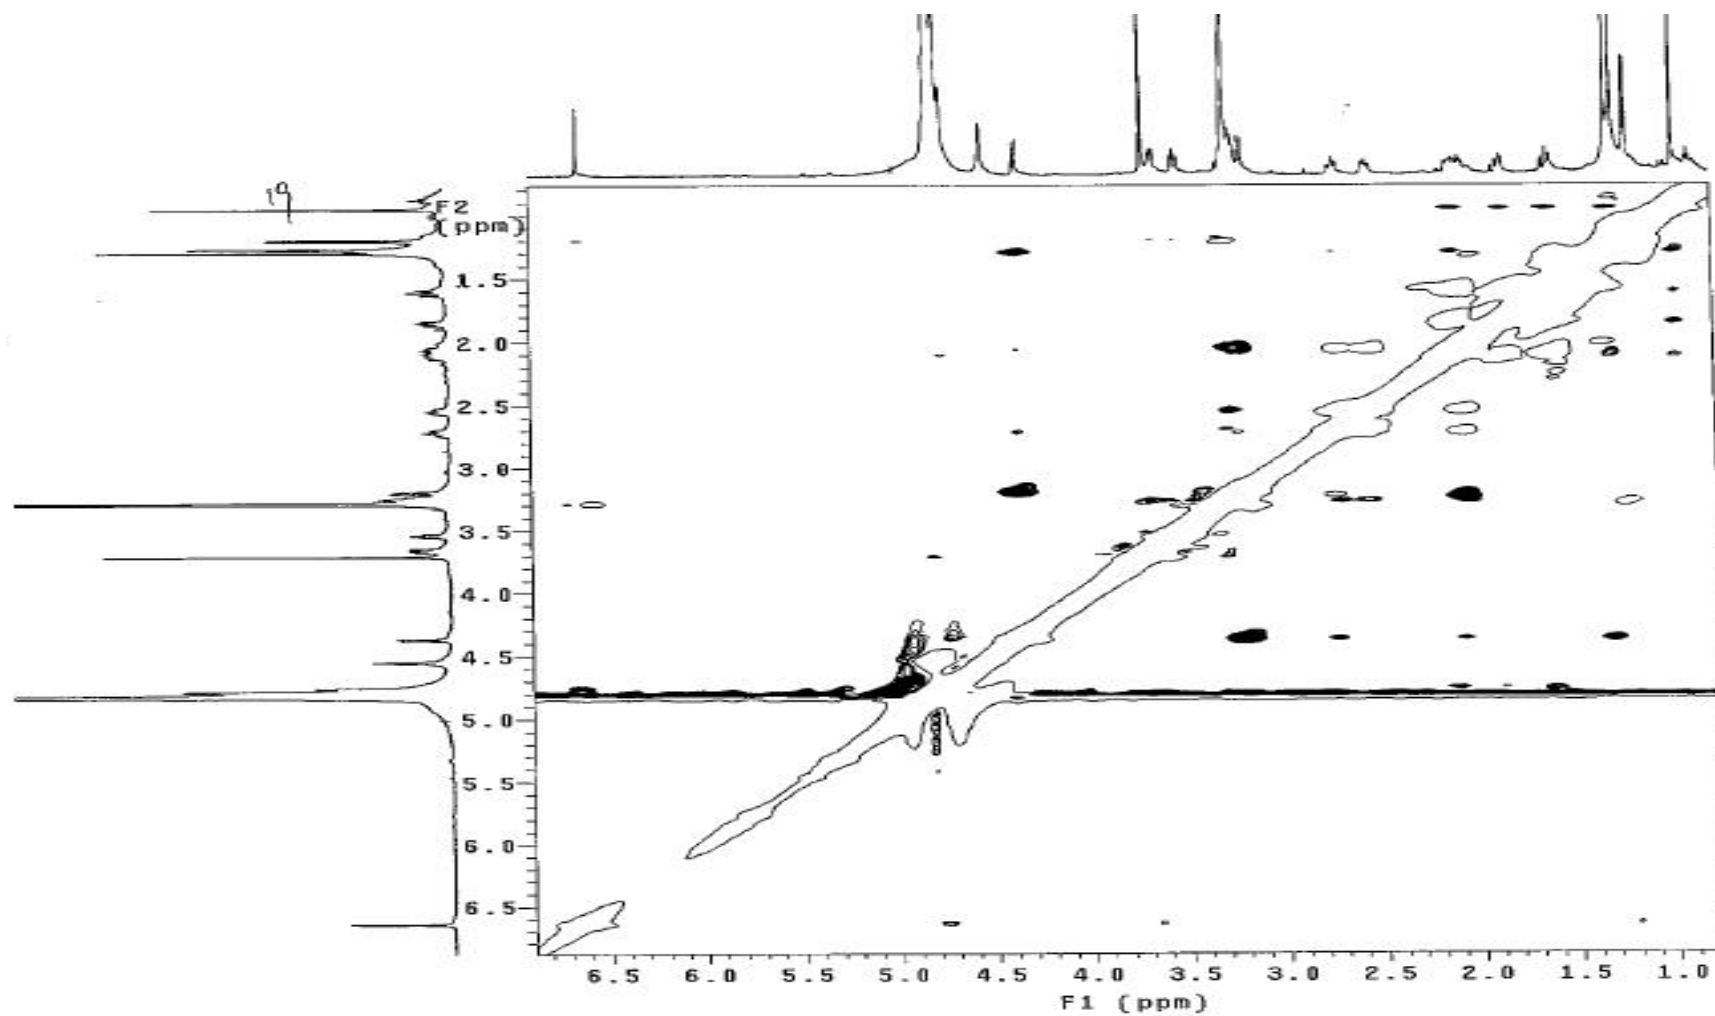

Lanceolatin E (5)

**Figure S32** HR-ESI-MS of Lanceolatin E

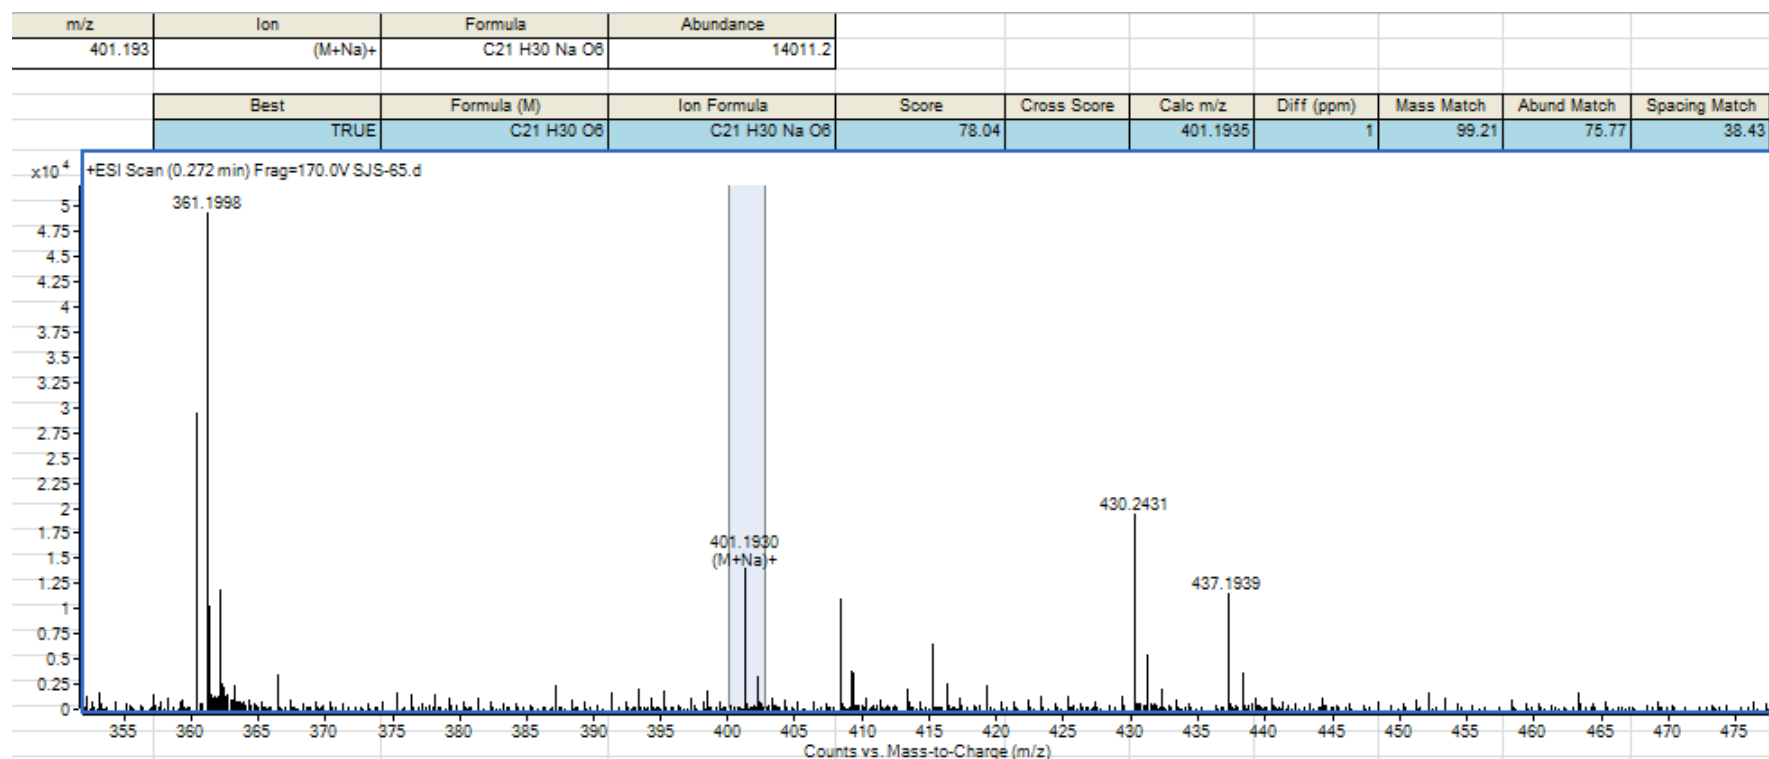

**Figure S33** IR(KBr) of Lanceolatin E (5)

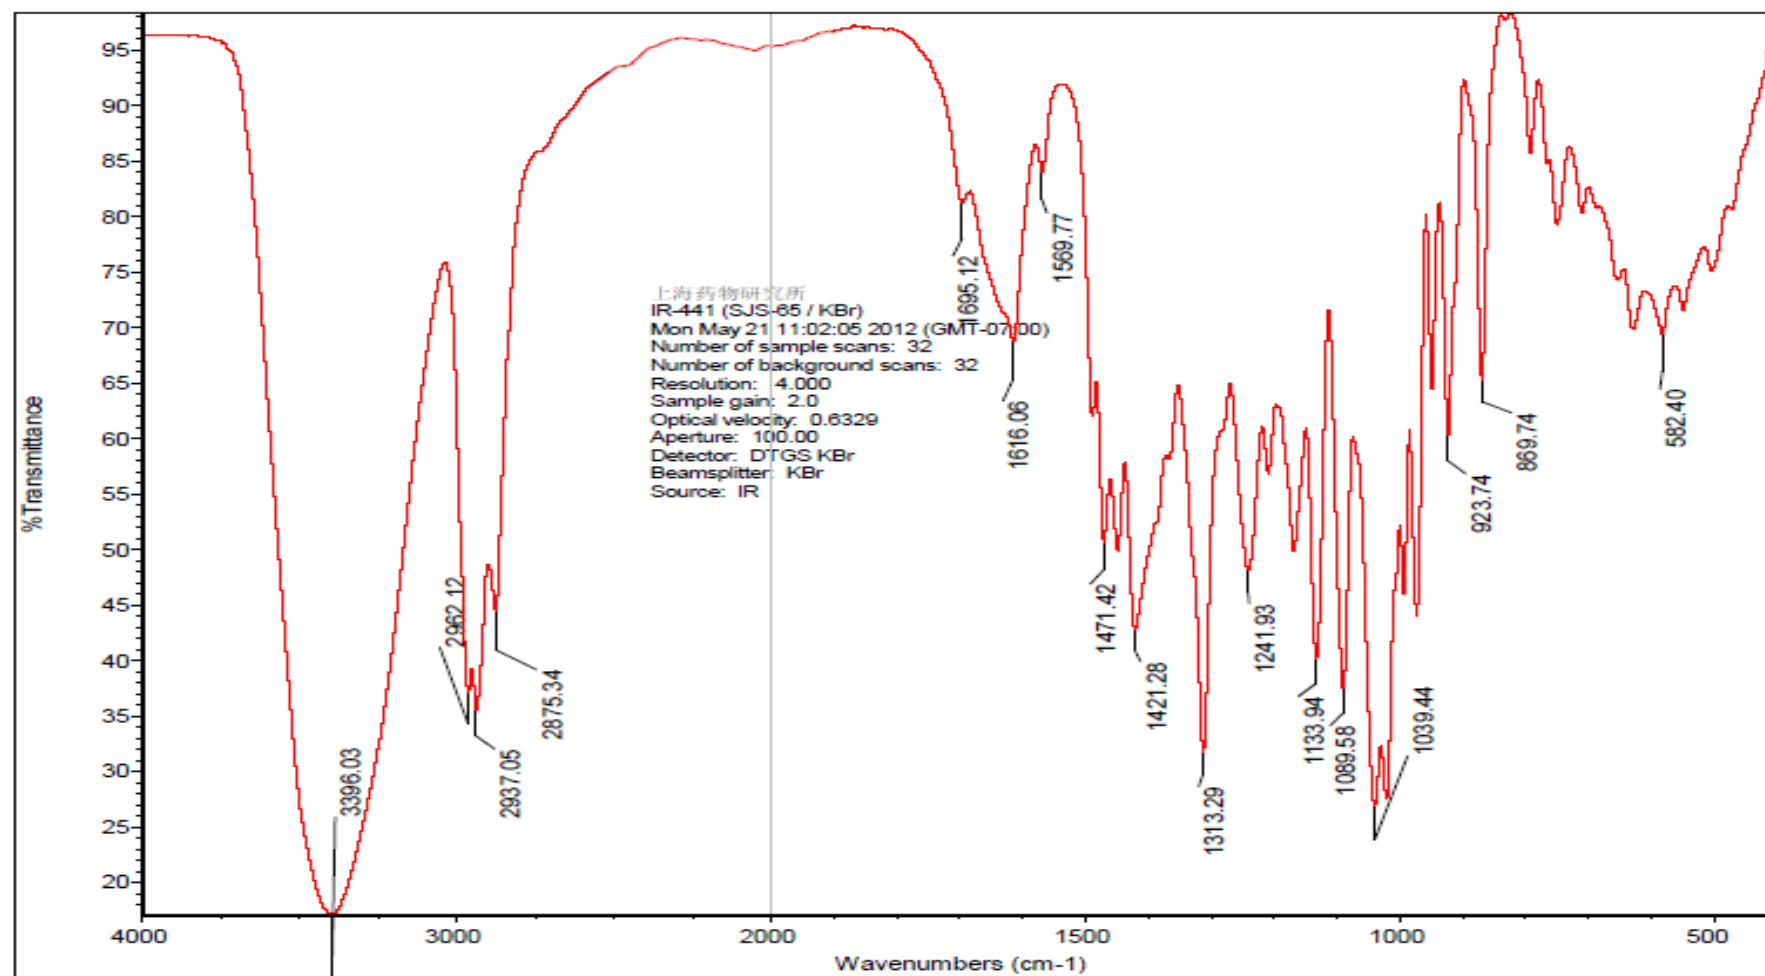

**Figure S34** <sup>1</sup>H NMR of Lanceolatin E (5)

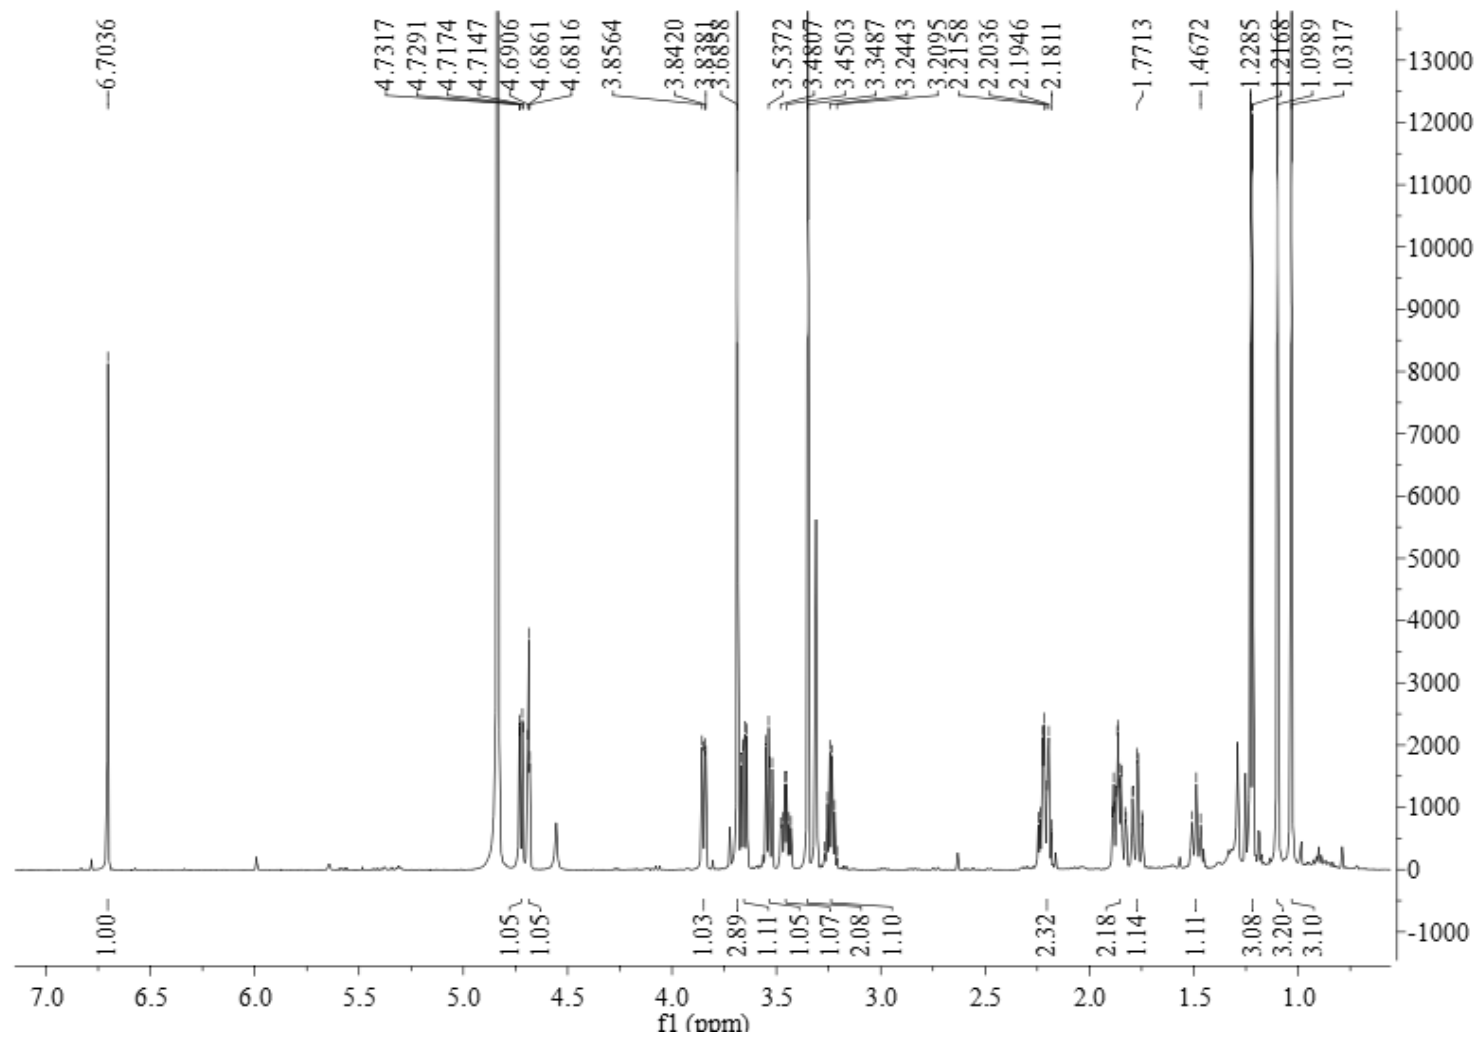

**Figure S35**  $^{13}\text{C}$  NMR and of Lanceolatin E (5)

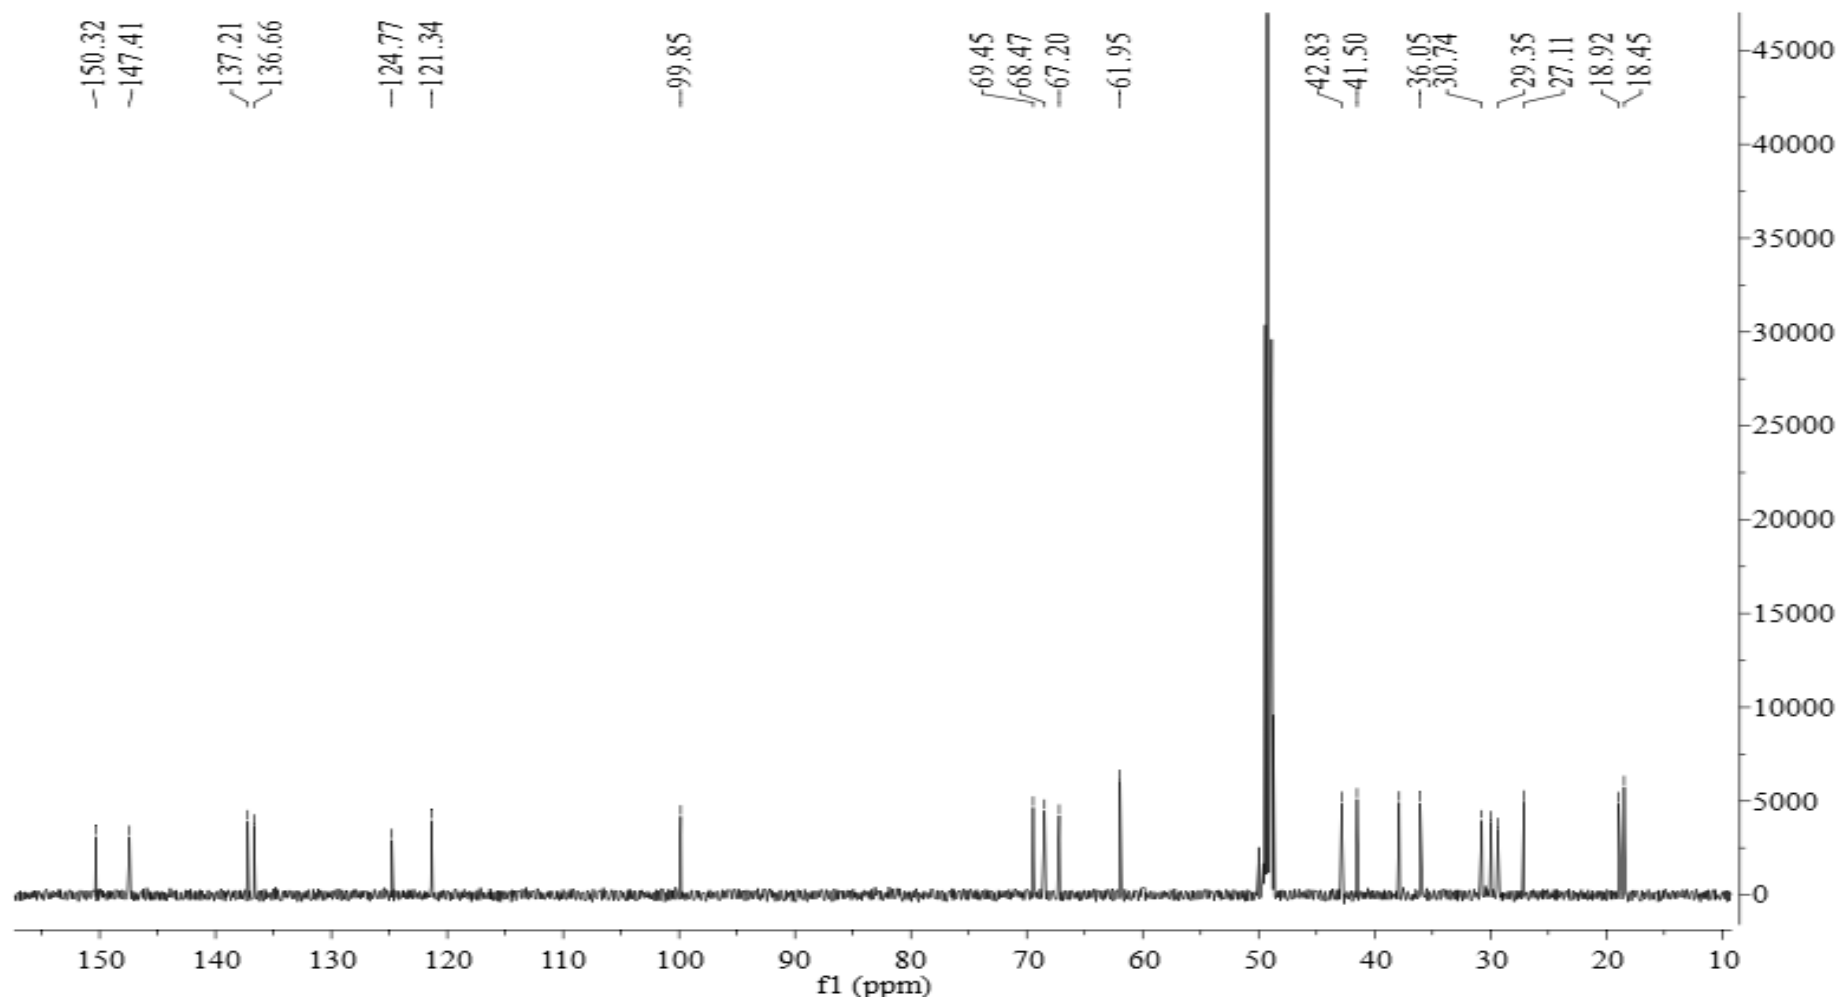

Figure S36 DEPT of Lanceolatin E (5)

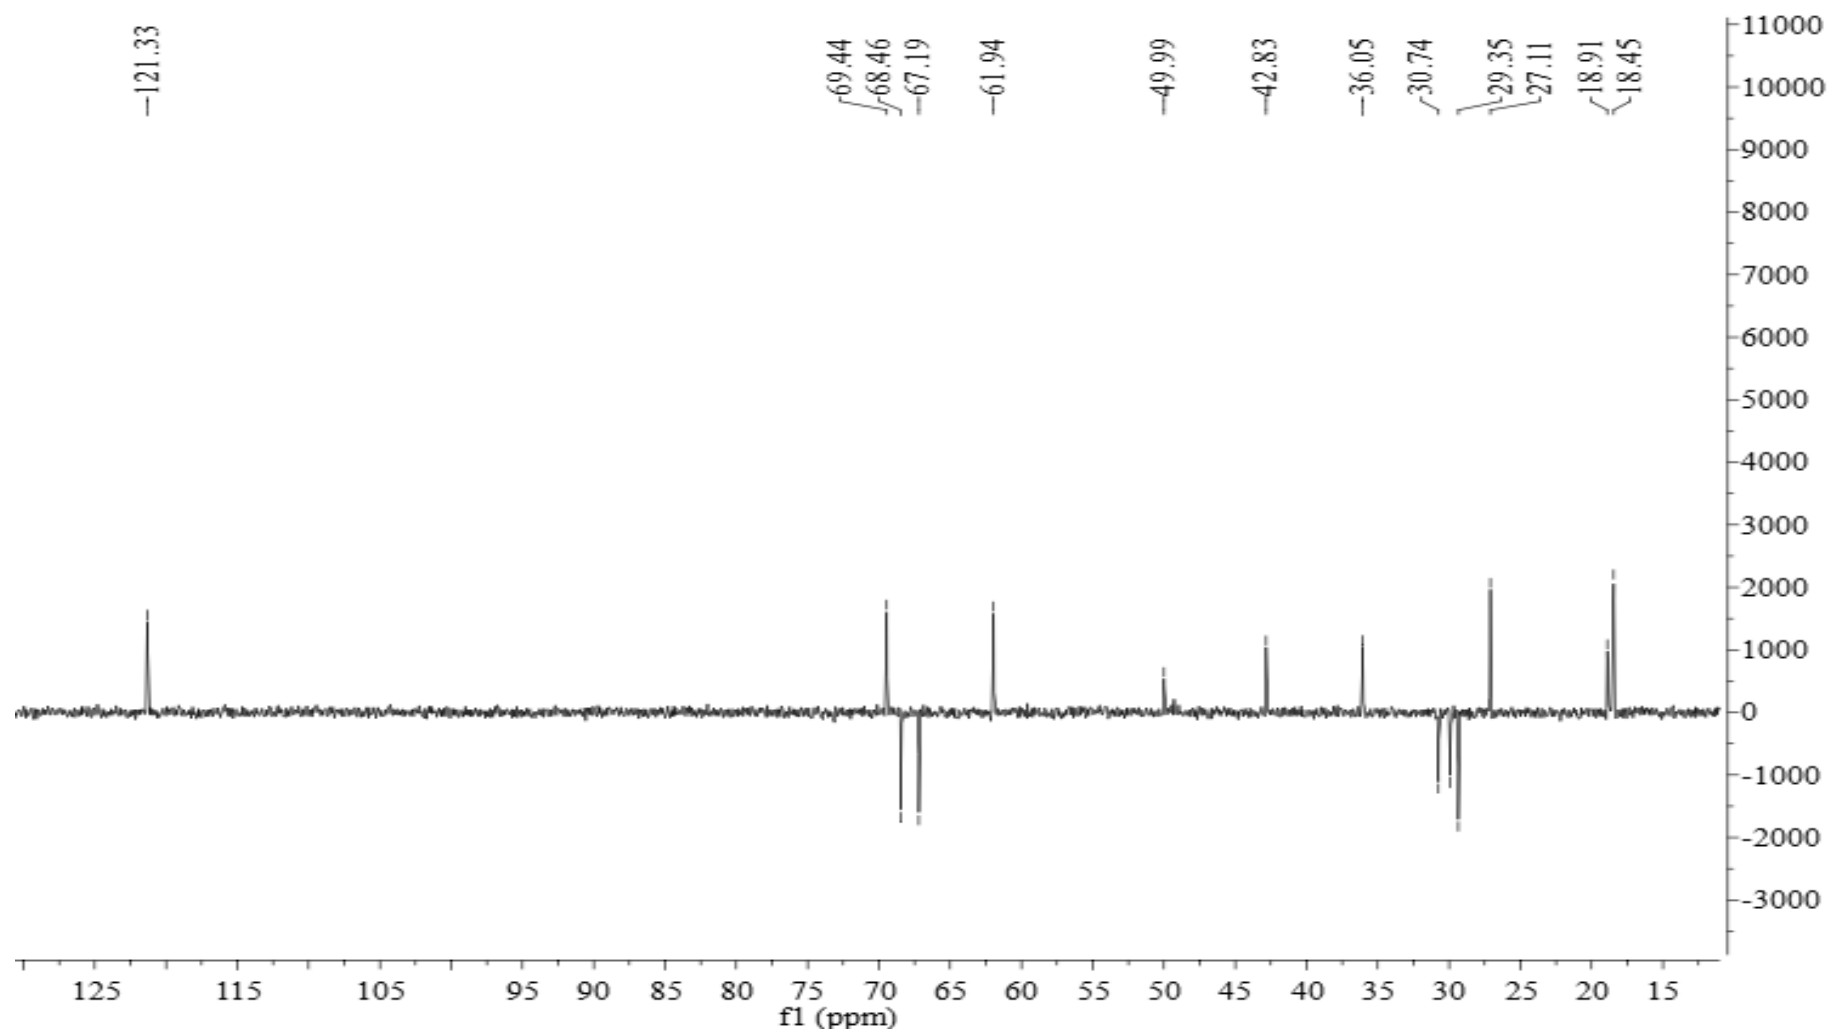

**Figure S37** HMQC of Lanceolatin E (5)

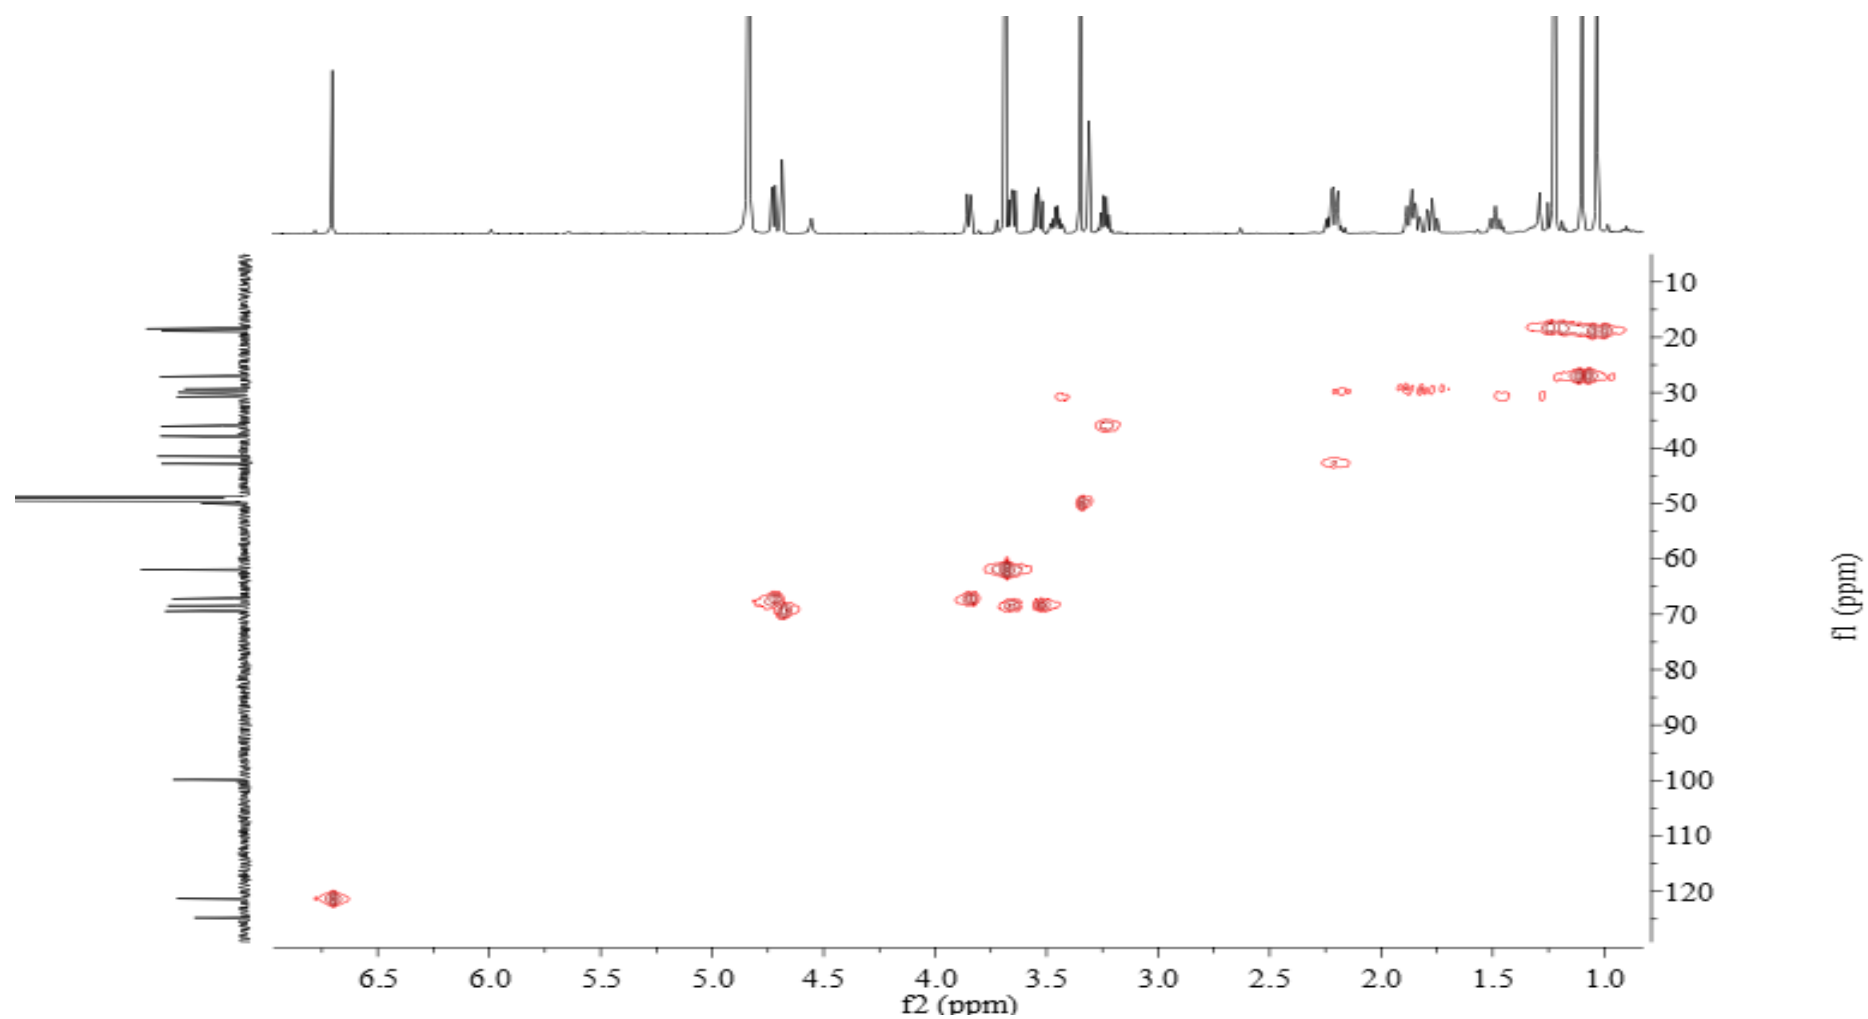

**Figure S38** HMBC of Lanceolatin E (**5**)



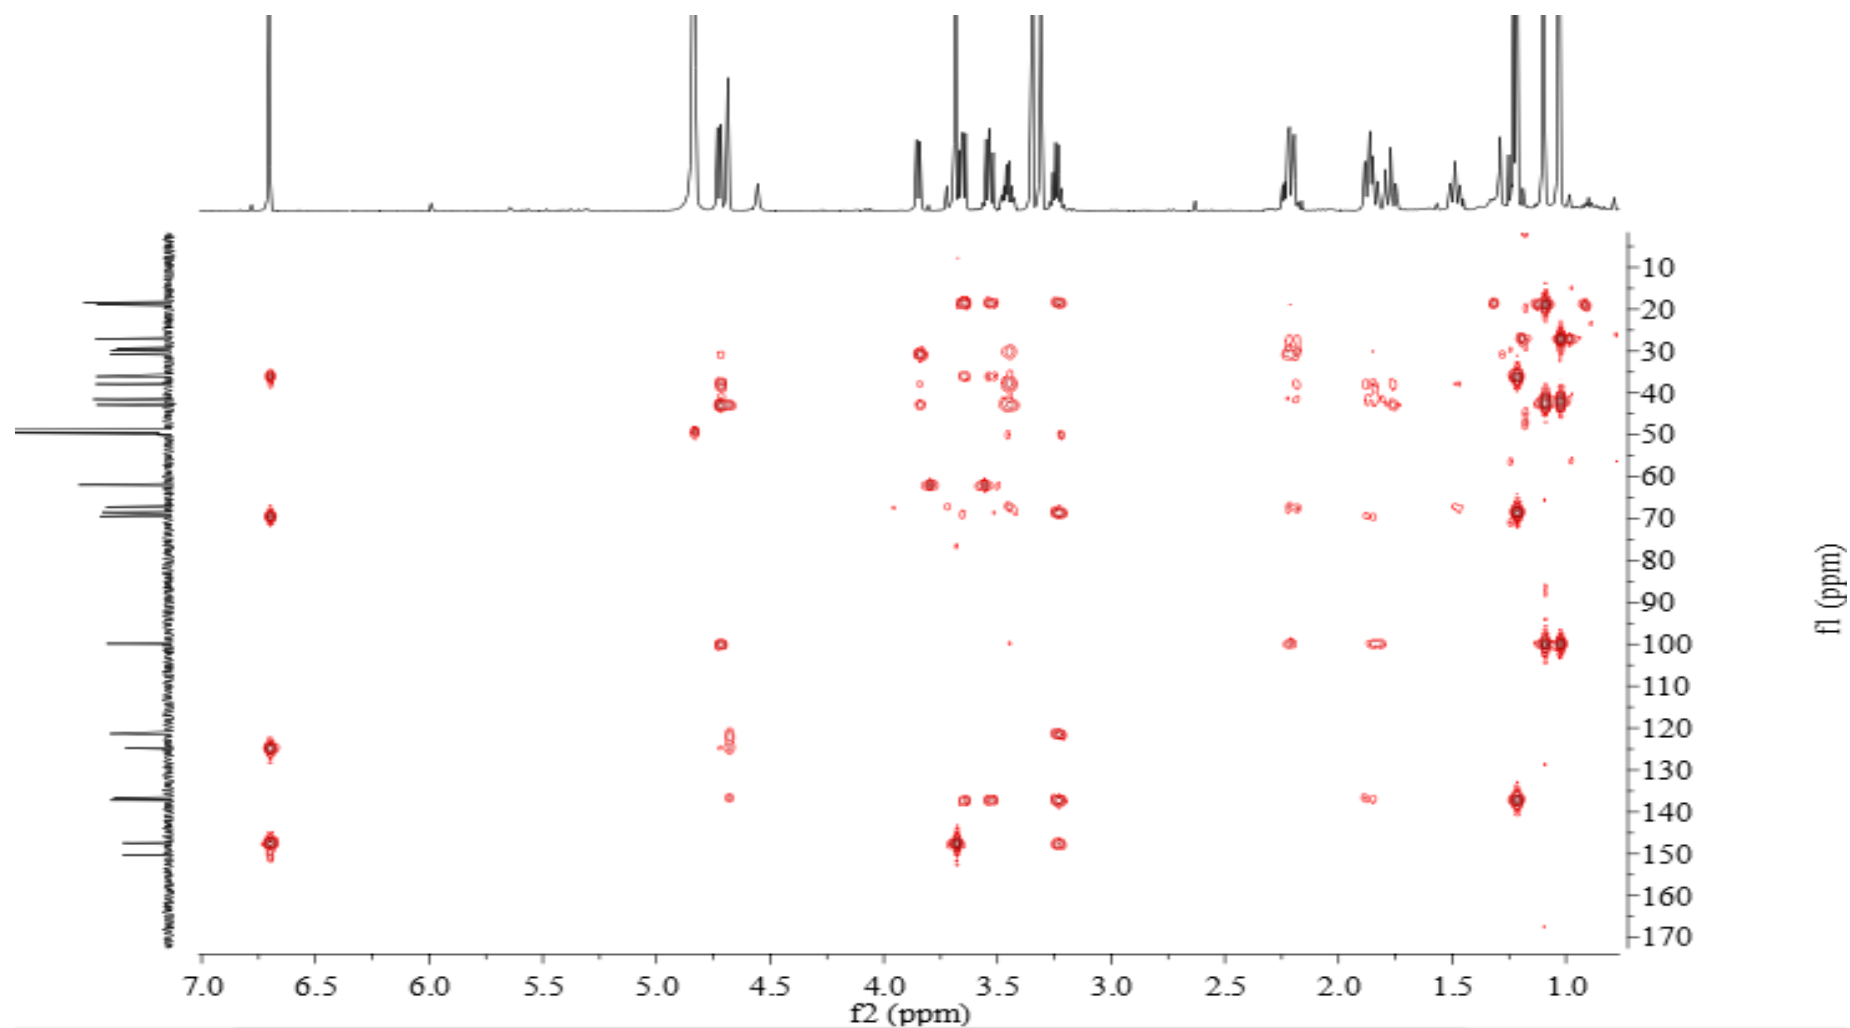

**Figure S39** NOSEY of Lanceolatin E (5)



**Figure S40** HR-ESI-MS of Lanceolatin F

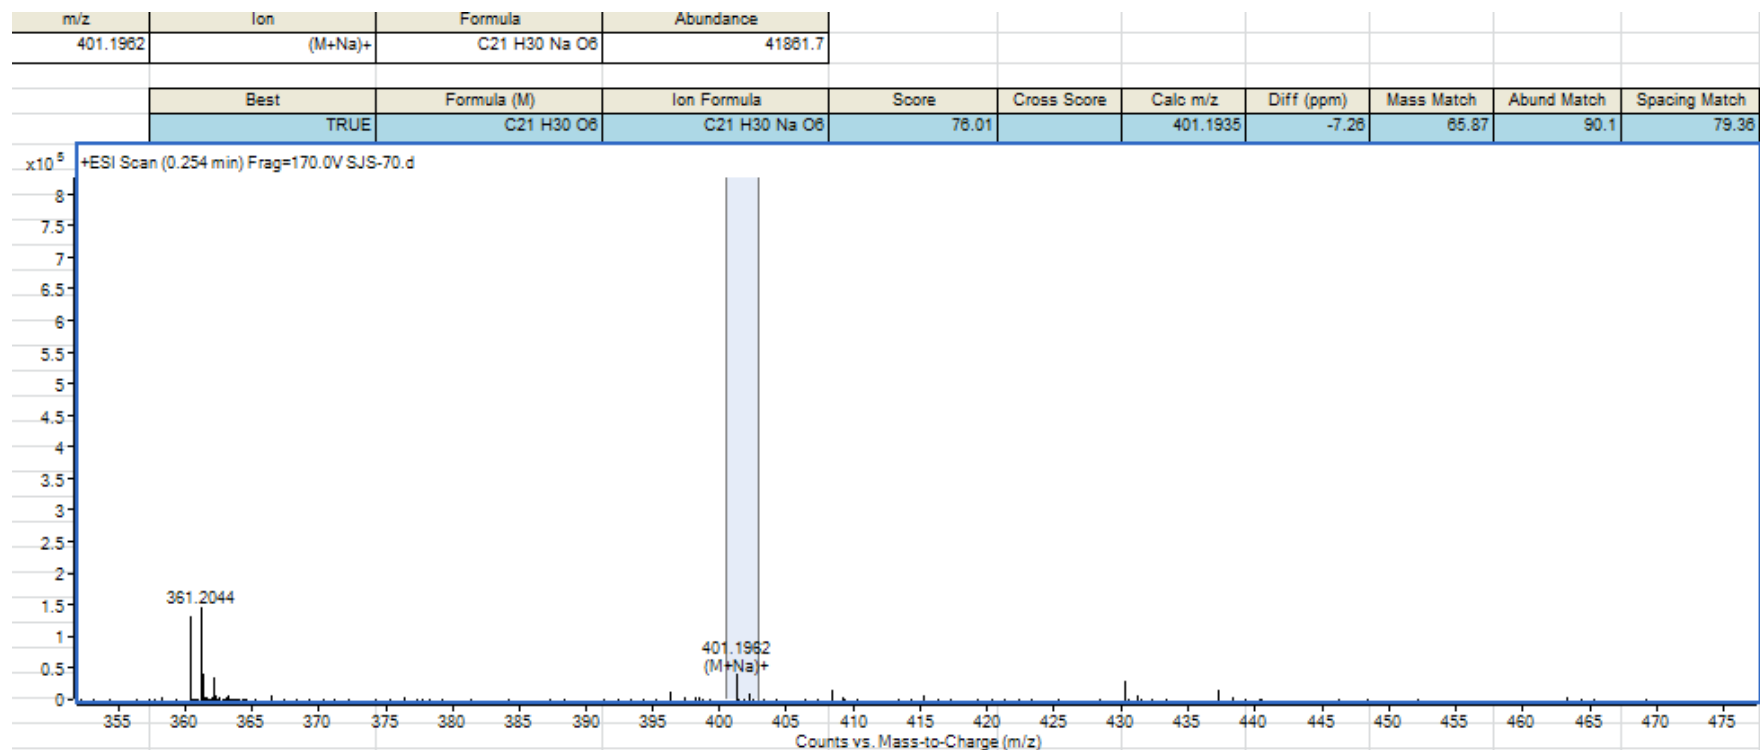

**Figure S41** IR(KBr) of Lanceolatin F (6)

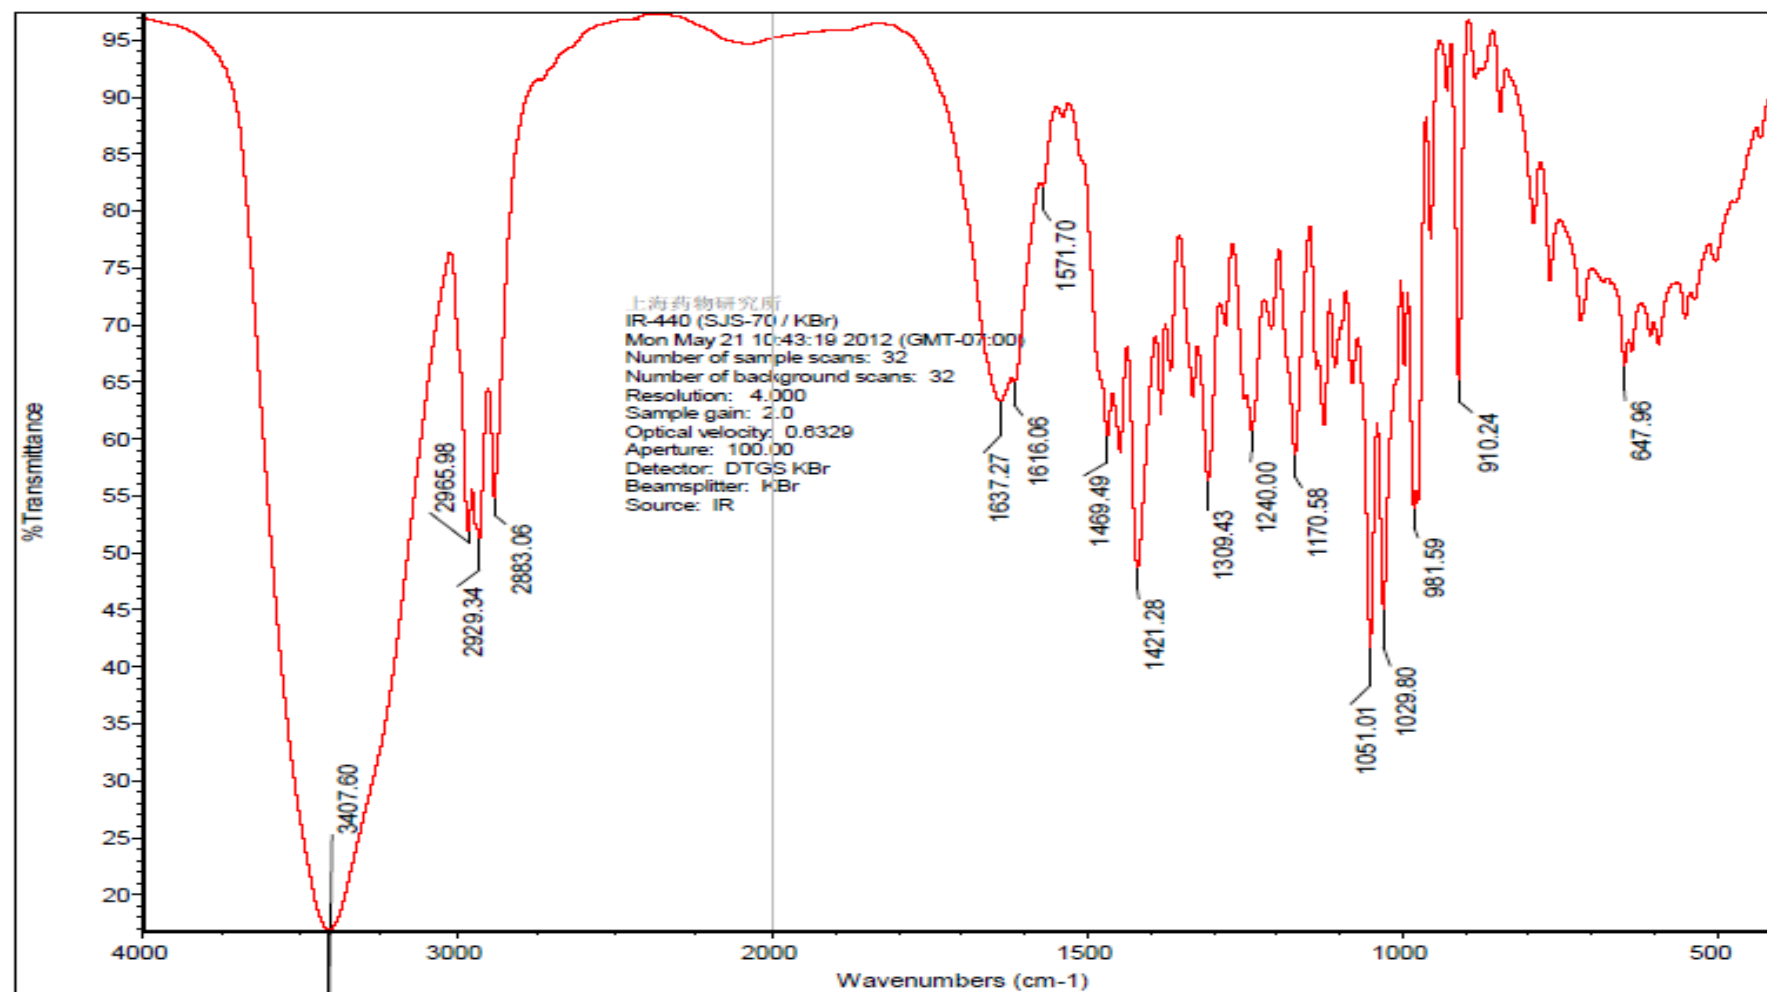

Figure S42 <sup>1</sup>H NMR of Lanceolatin F (6)

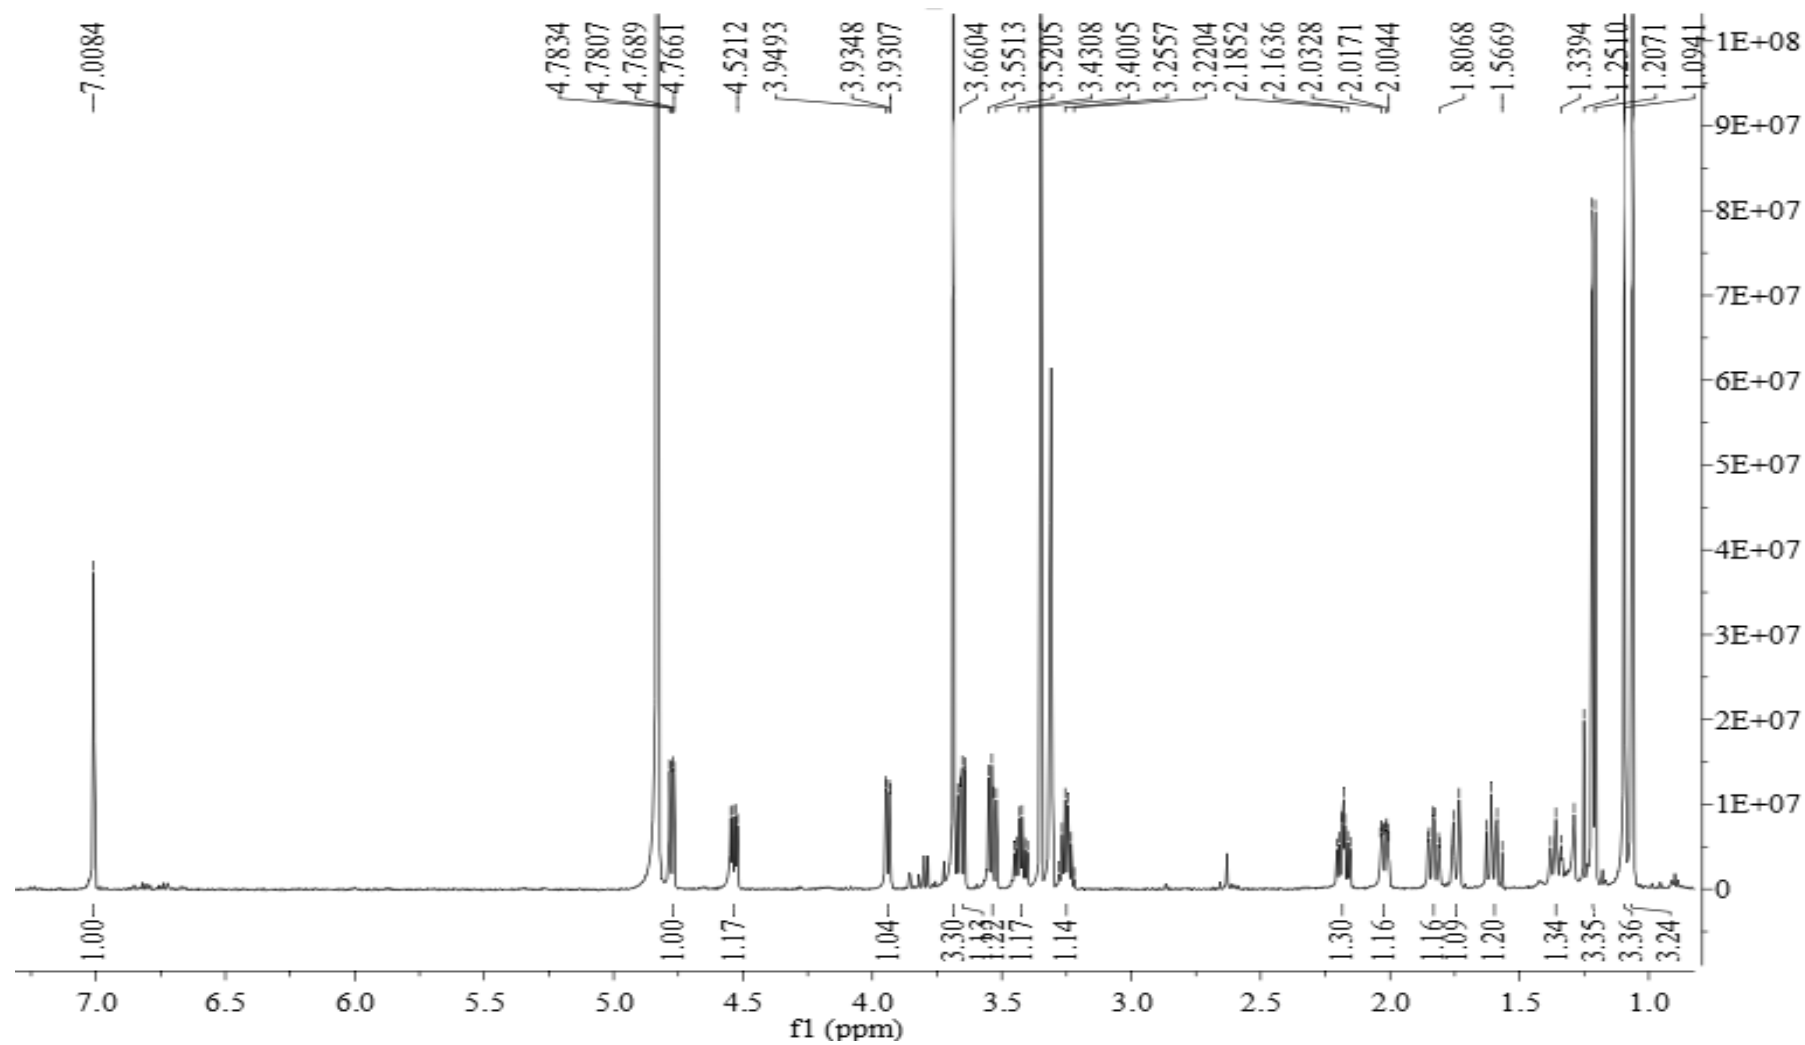

**Figure S43**  $^{13}\text{C}$  NMR of Lanceolatin F (6)

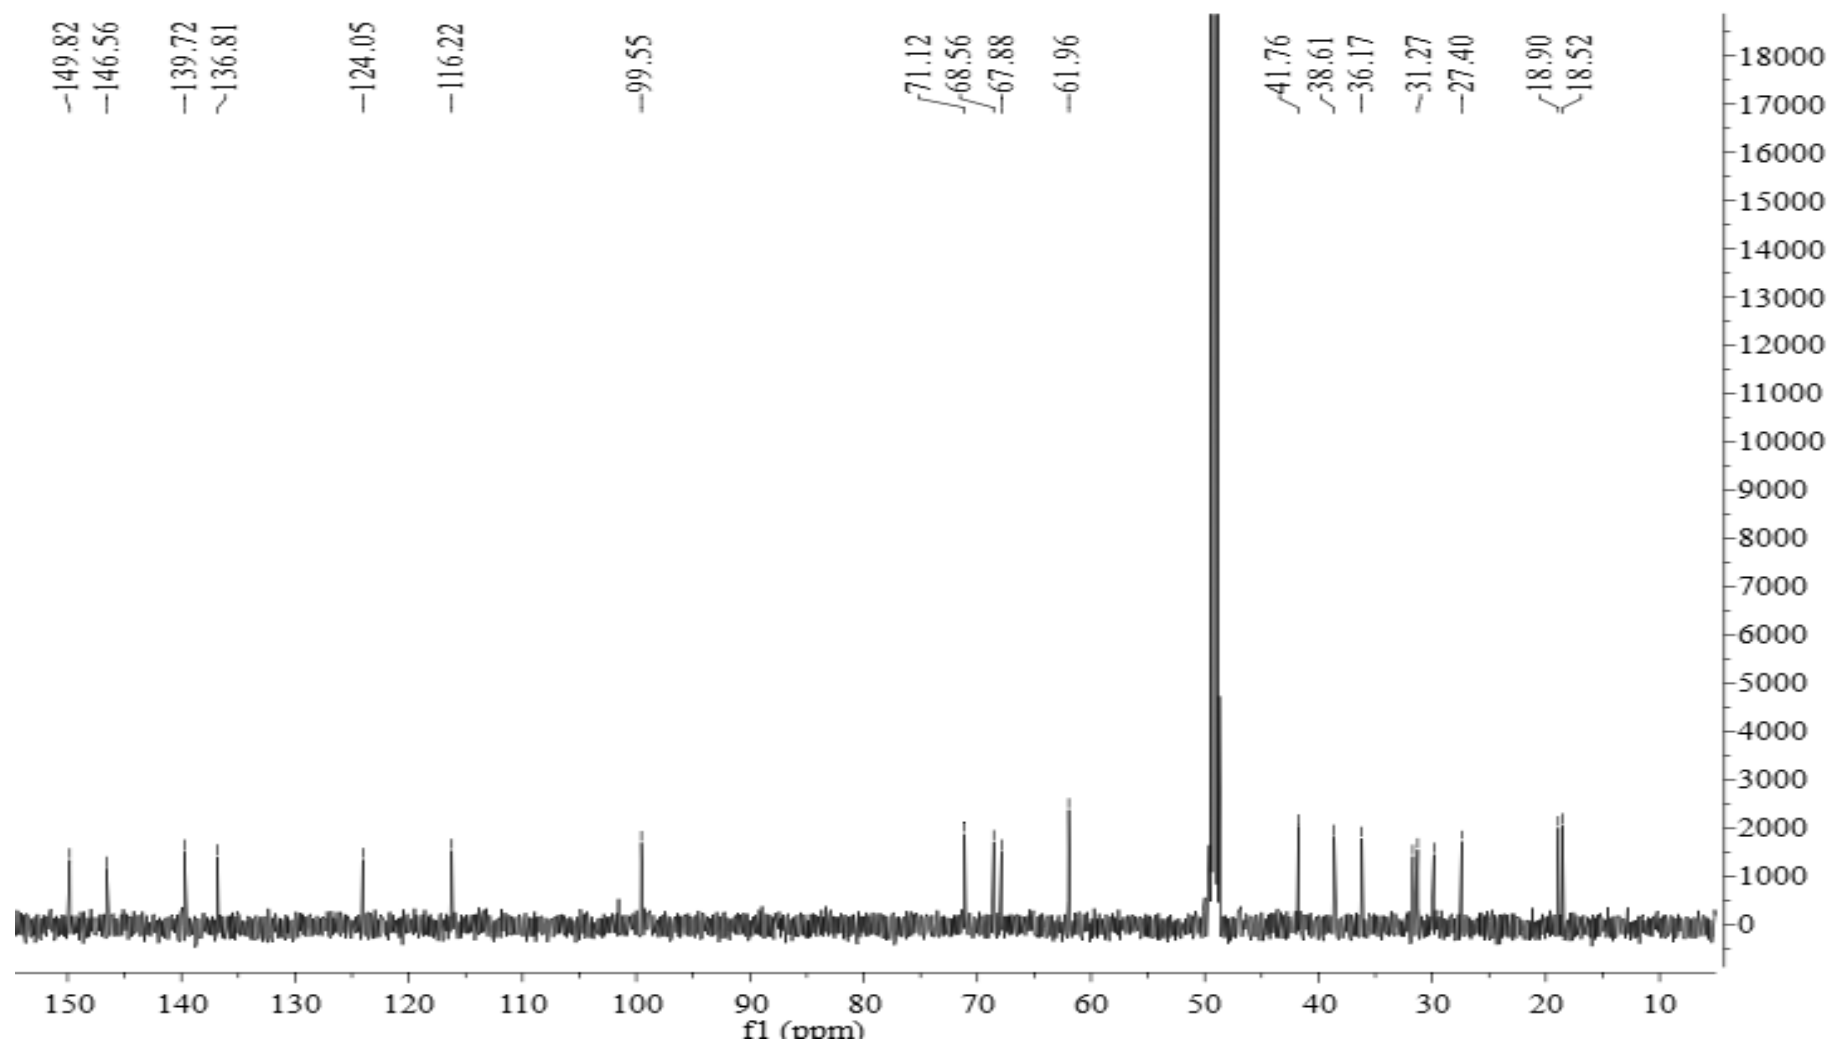

**Figure S44** DEPT of Lanceolatin F (6)

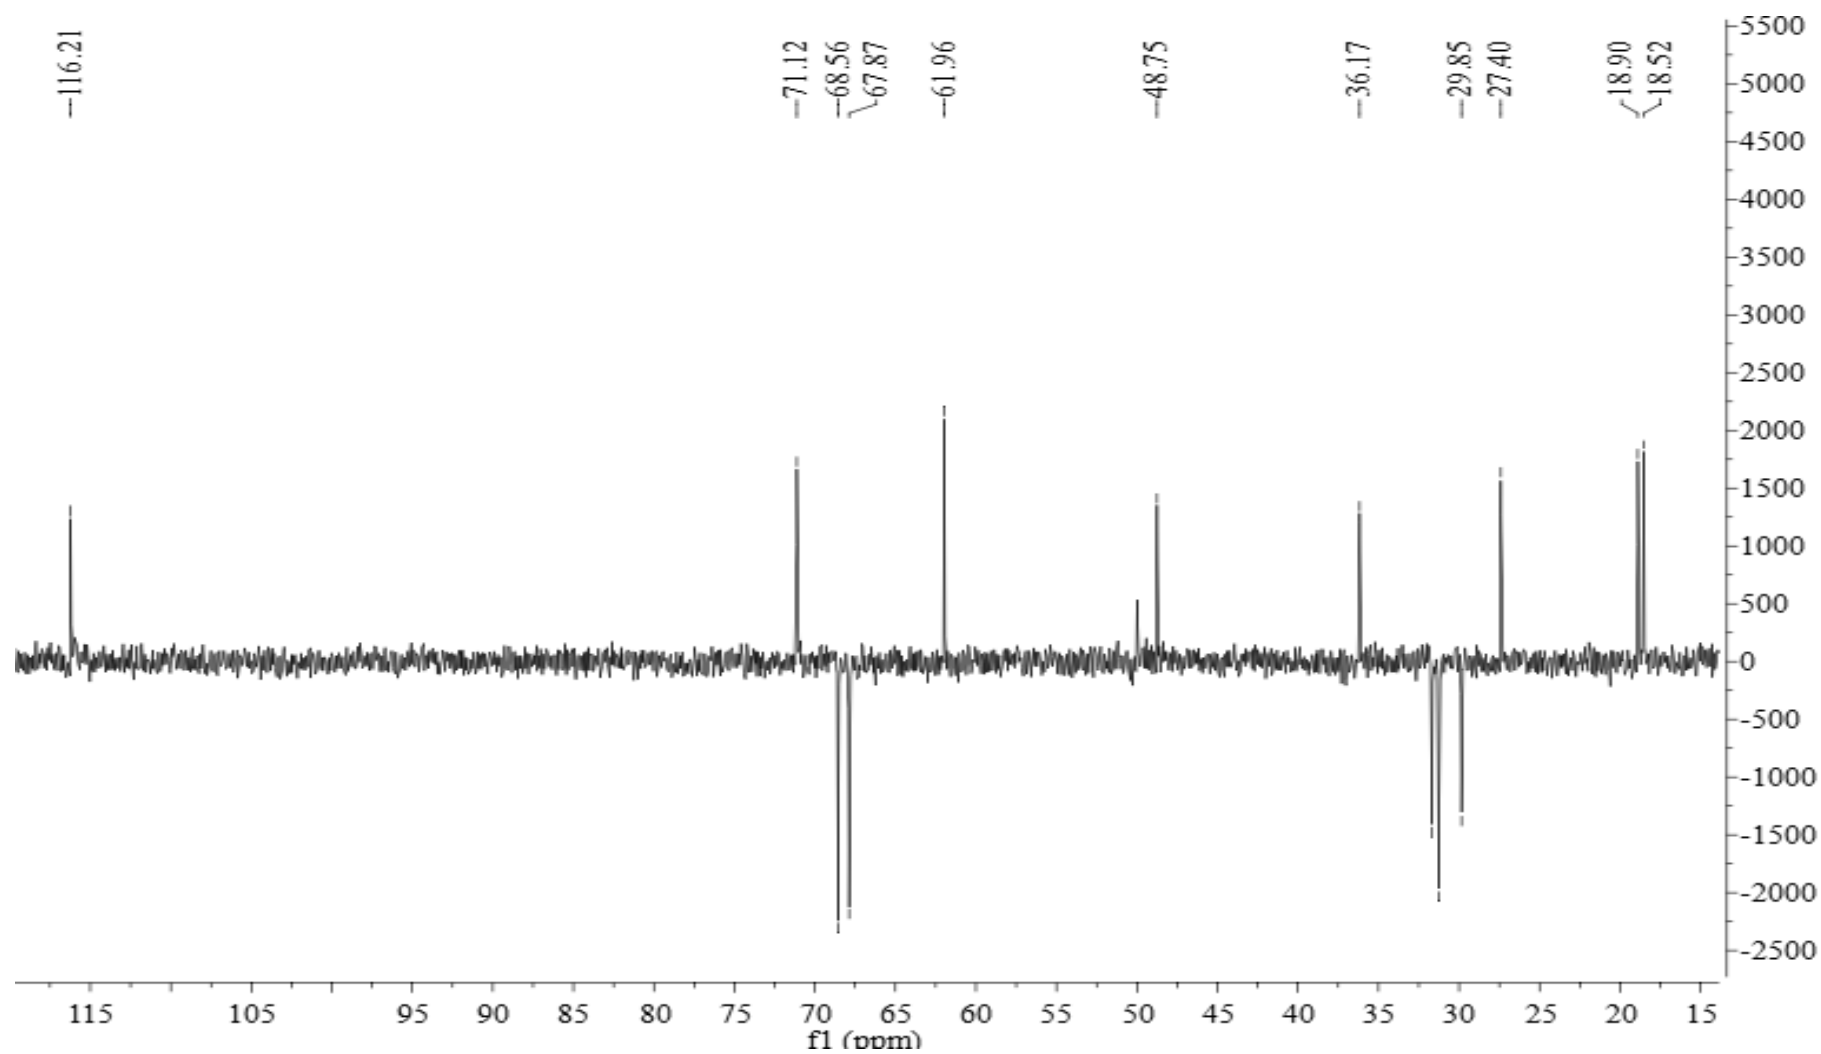

**Figure S45** HMQC of Lanceolatin F (6)

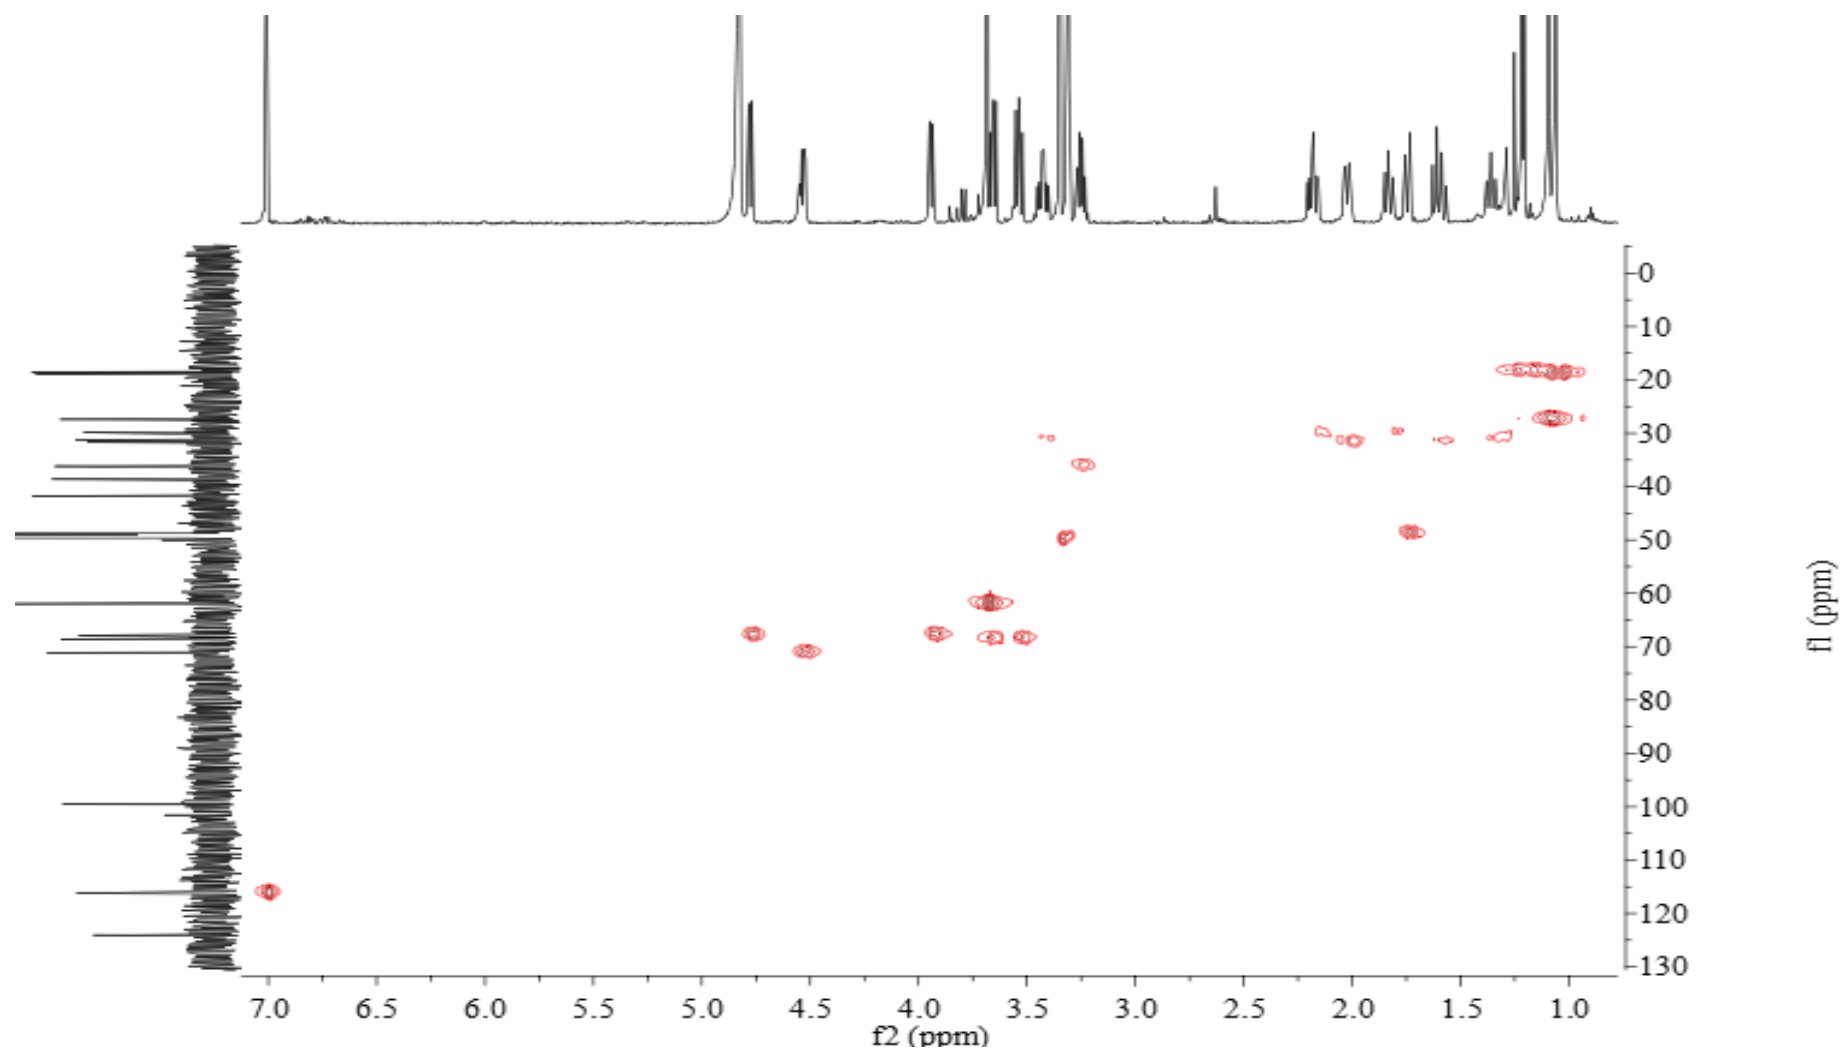

**Figure S46** HMBC of Lanceolatin F (**6**)



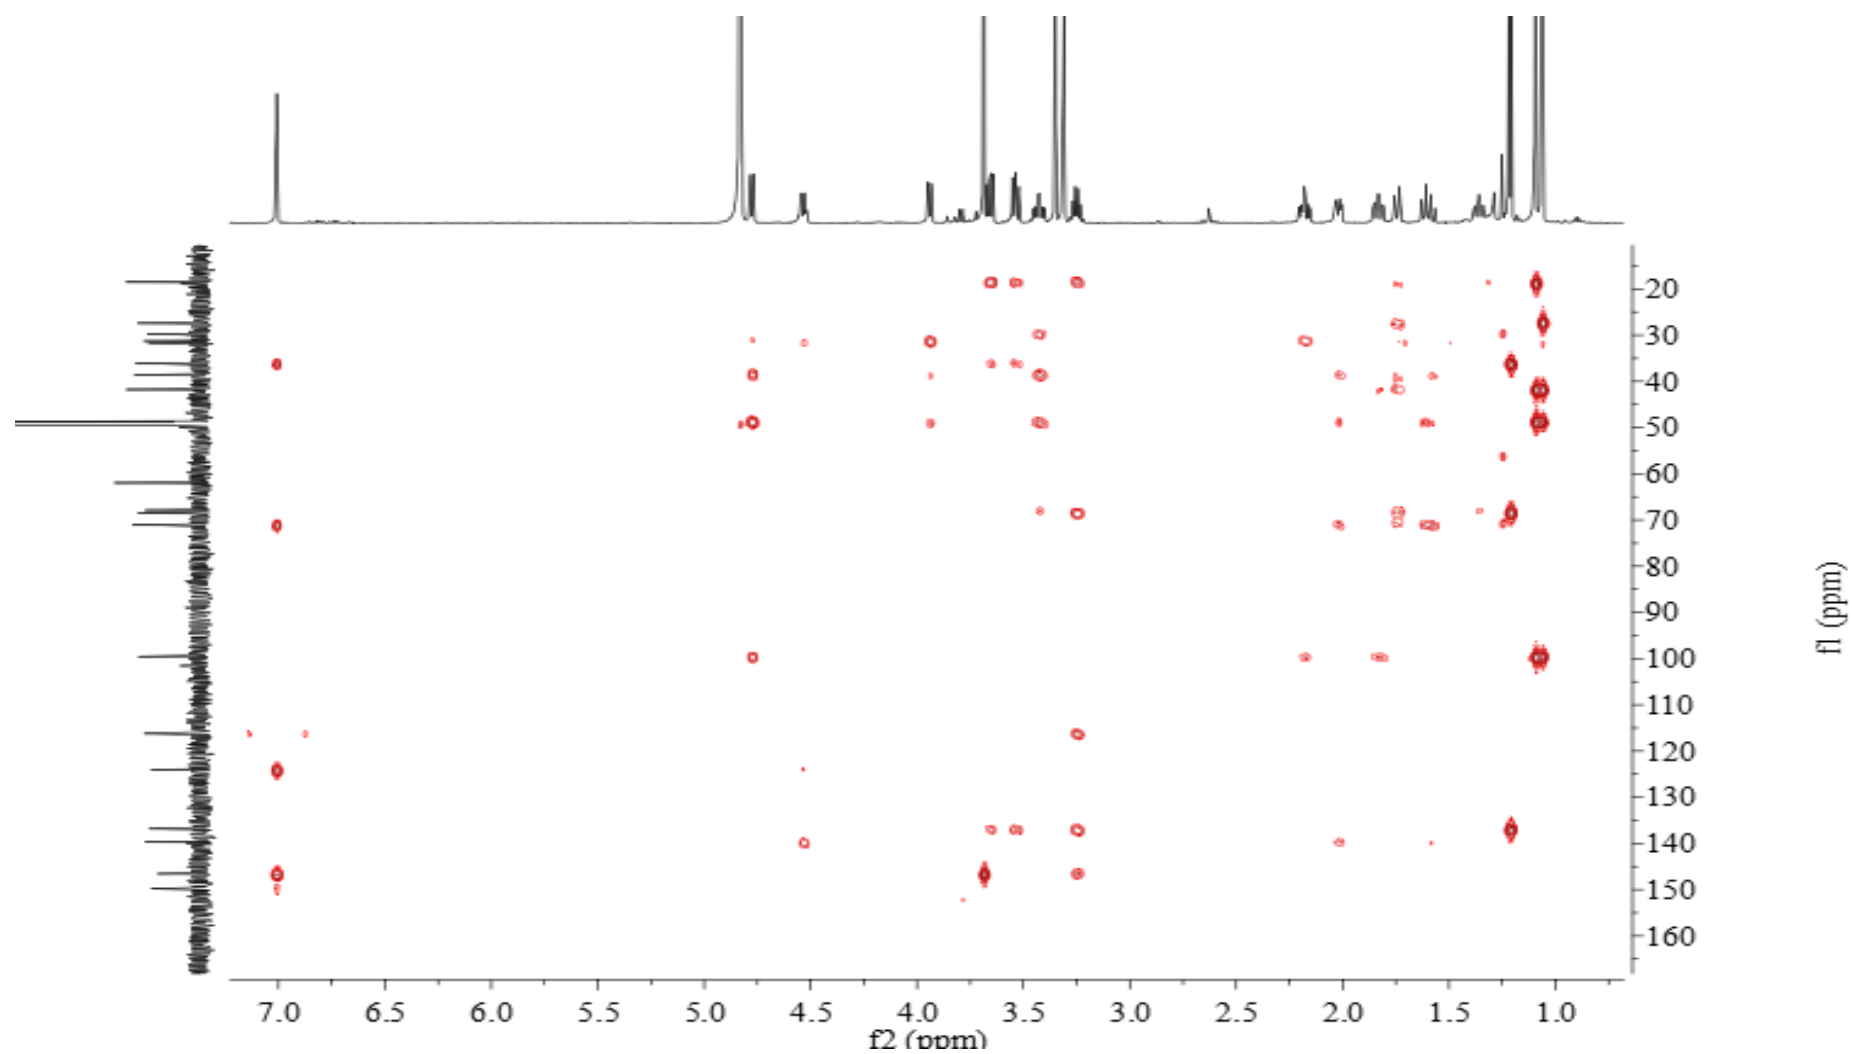

**Figure S47** NOSEY of Lanceolatin F (**6**)

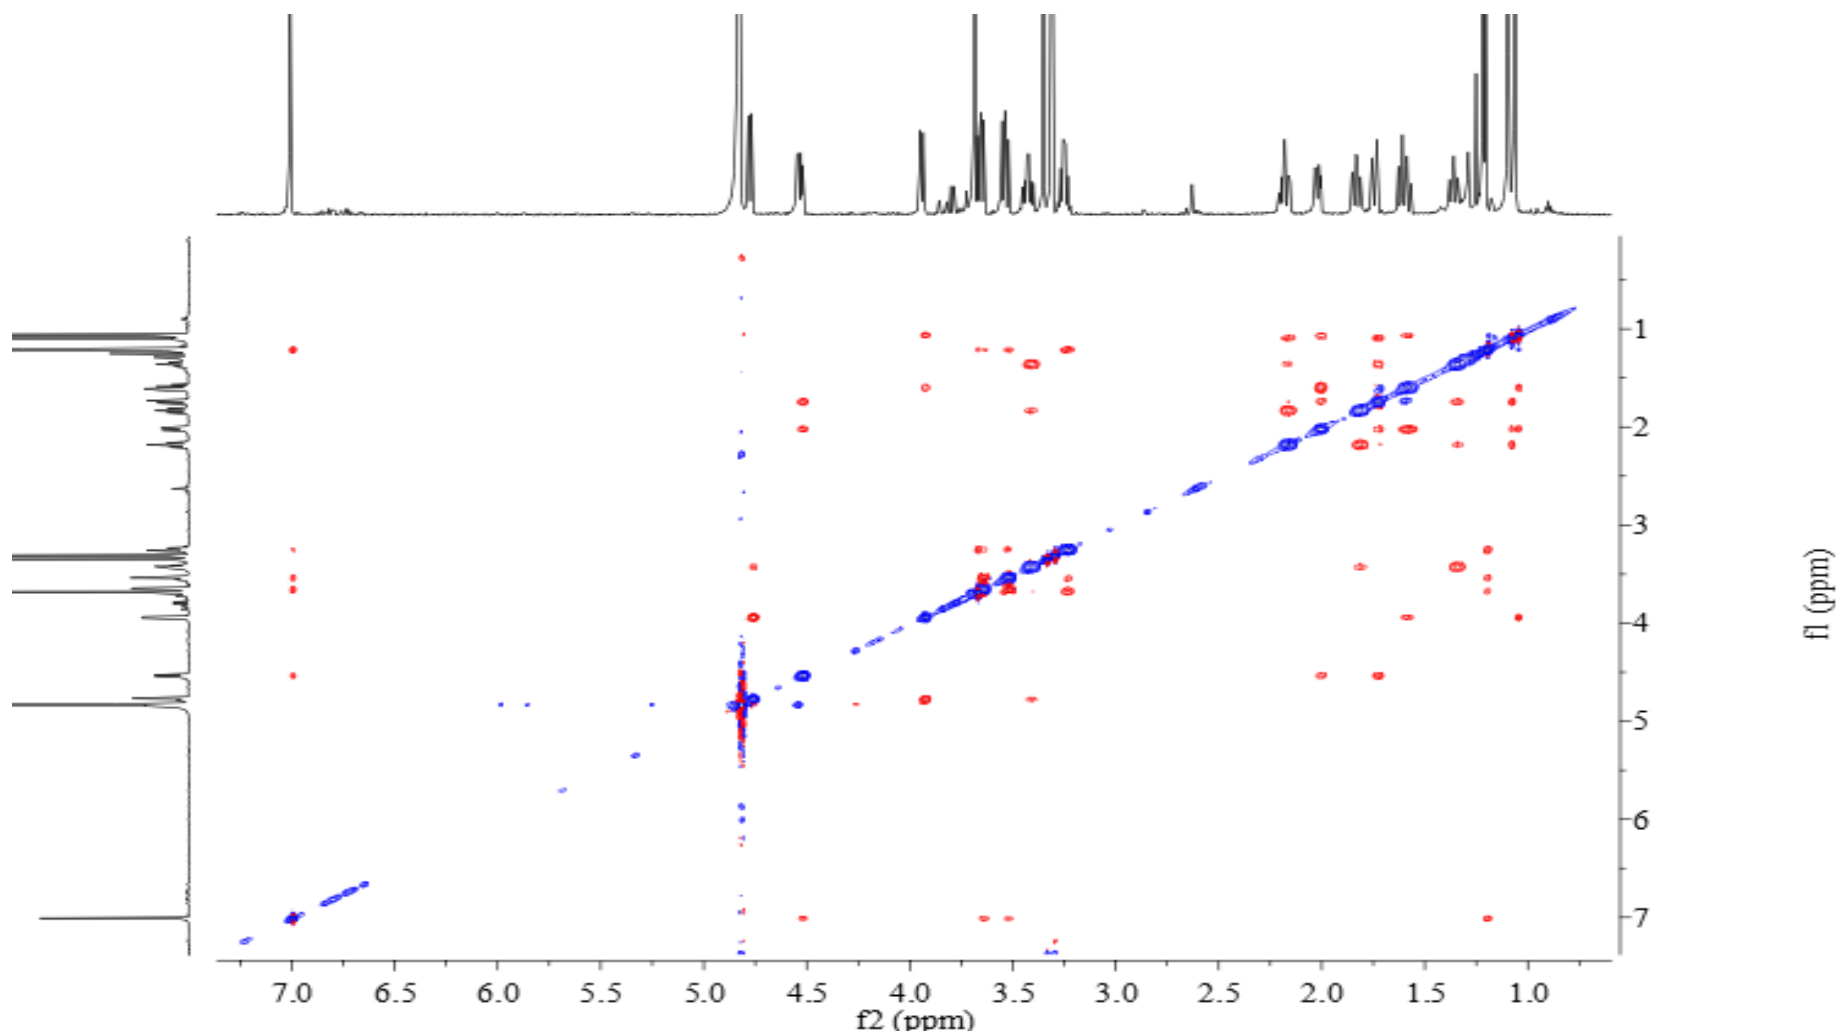

Lanceolatin G (7)

**Figure S48** HR-ESI-MS of Lanceolatin G (7)

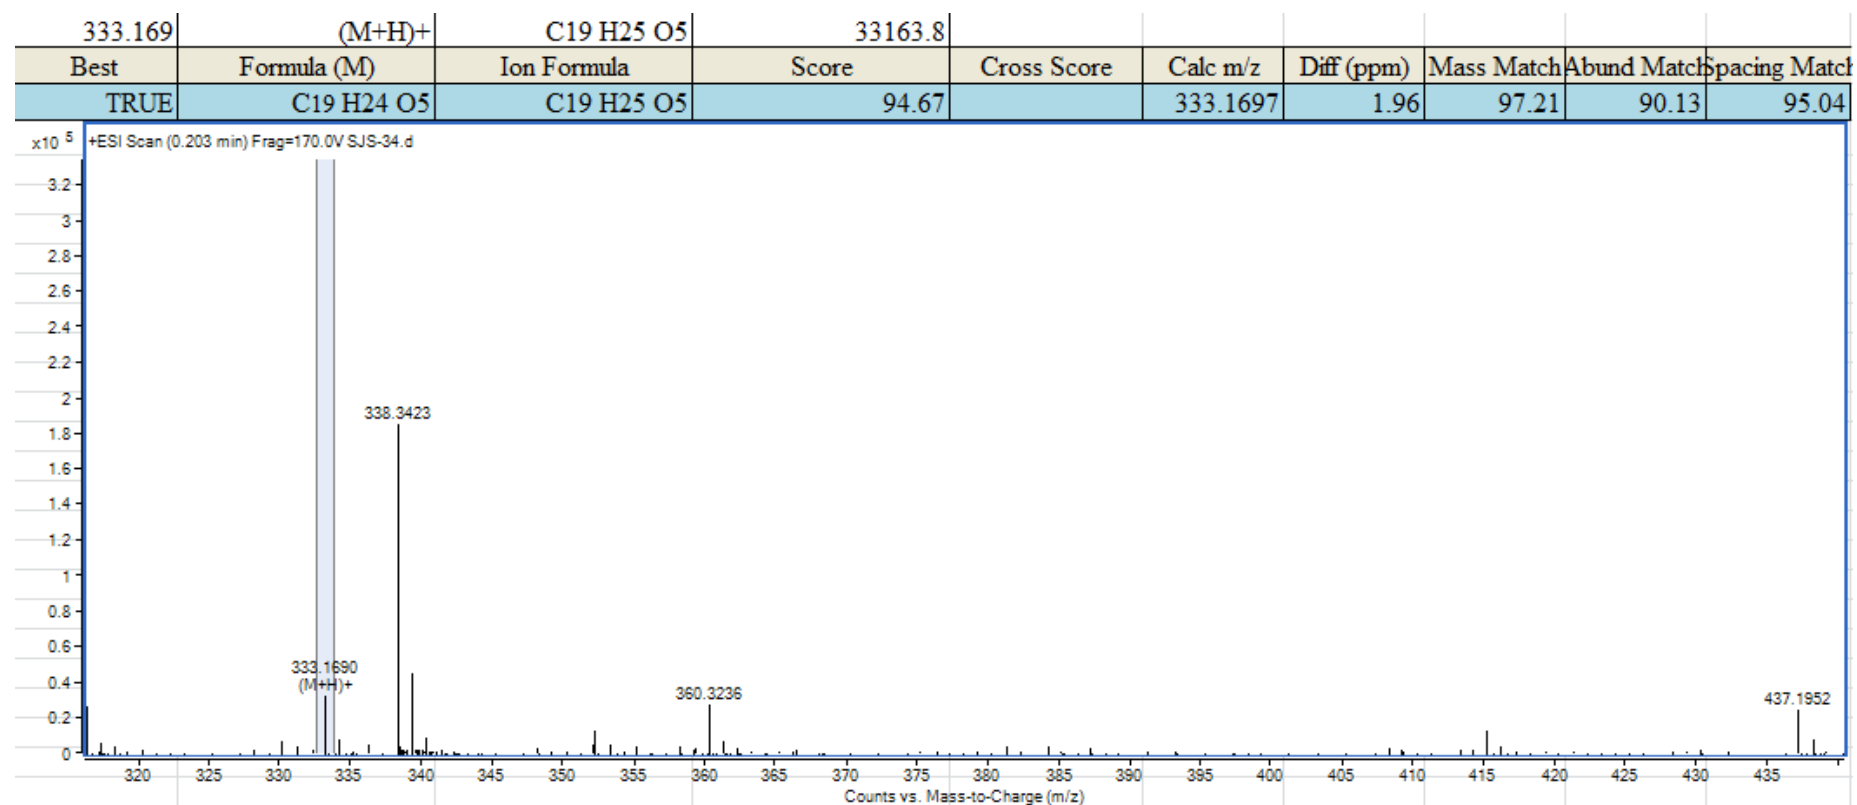

**Figure S49** IR(KBr) of Lanceolatin G (7)

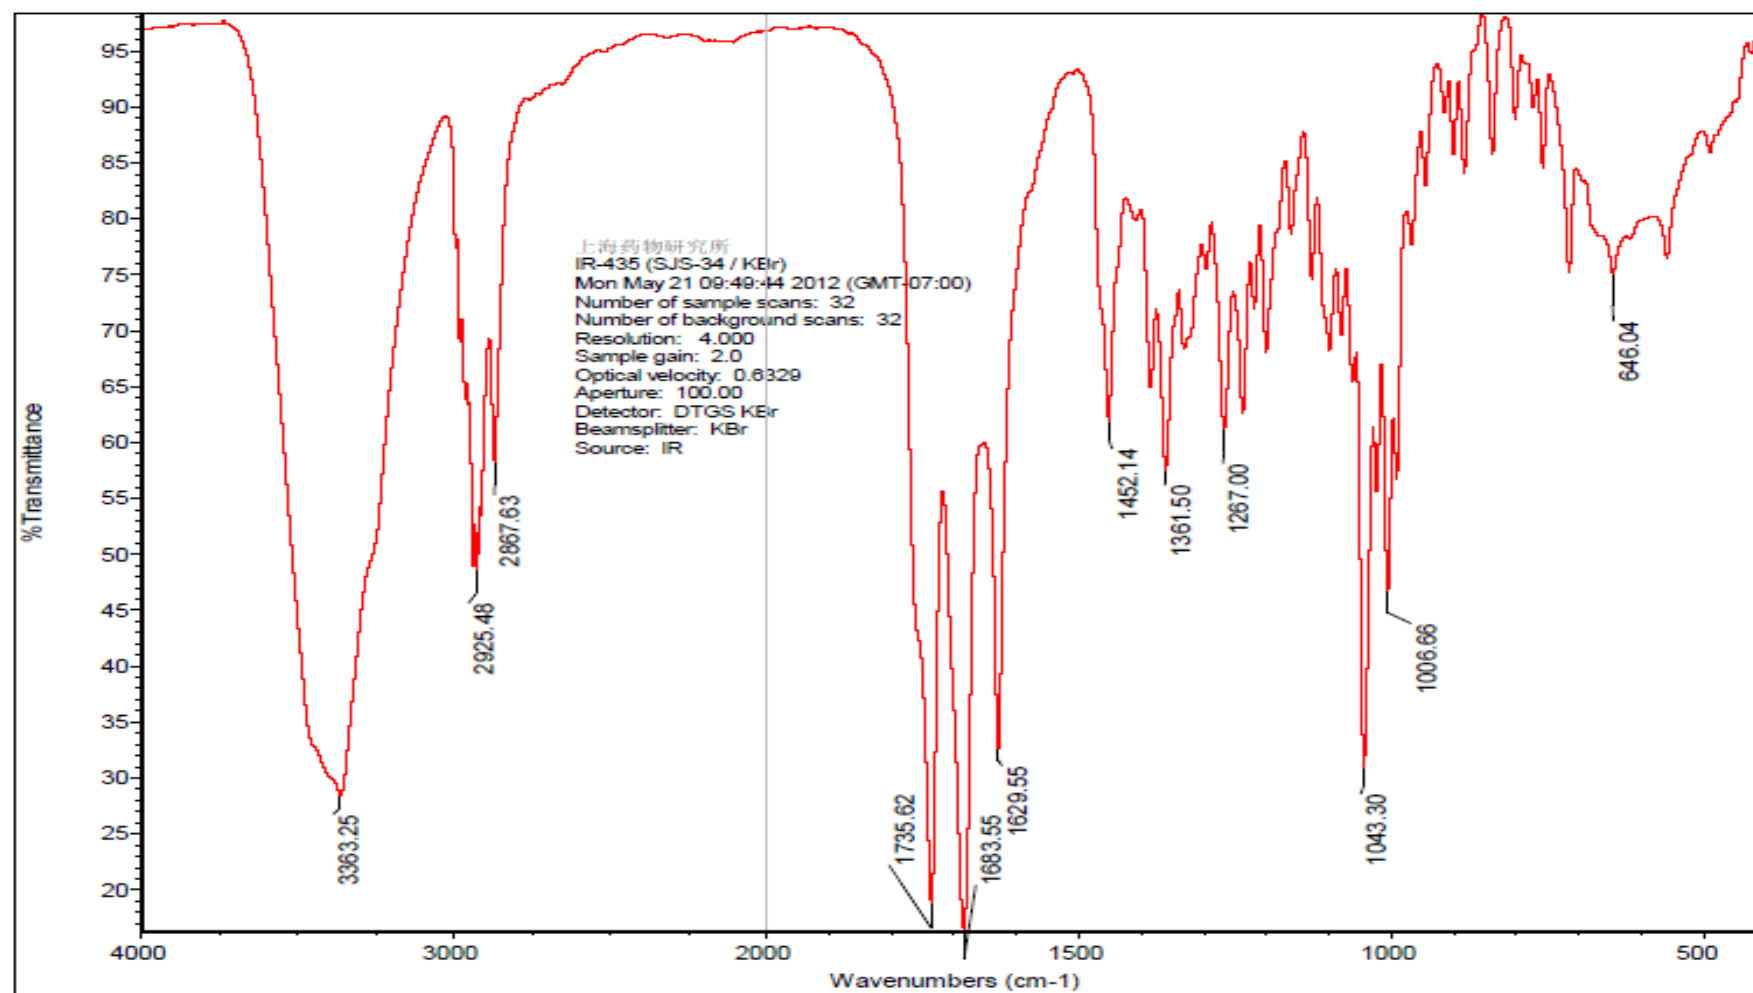

Figure S50 <sup>1</sup>H NMR of Lanceolatin G (7)

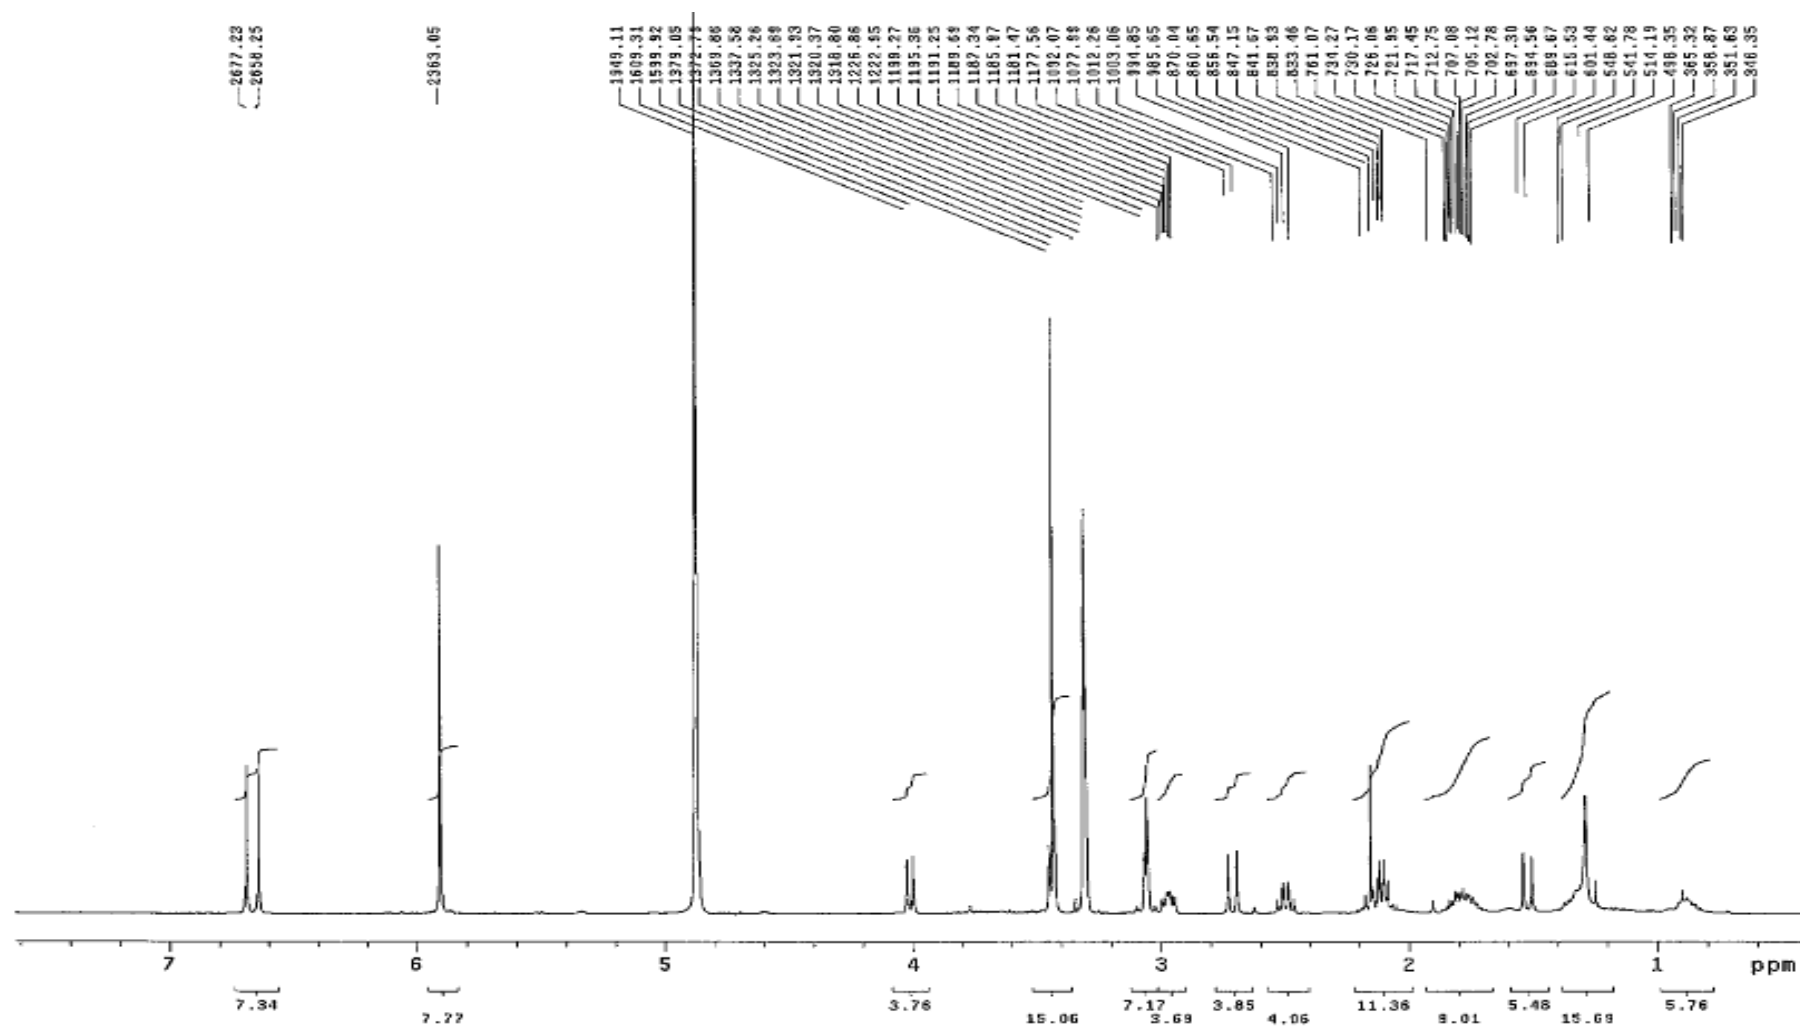

**Figure S51**  $^{13}\text{C}$  NMR and DEPT of Lanceolatin G (7)

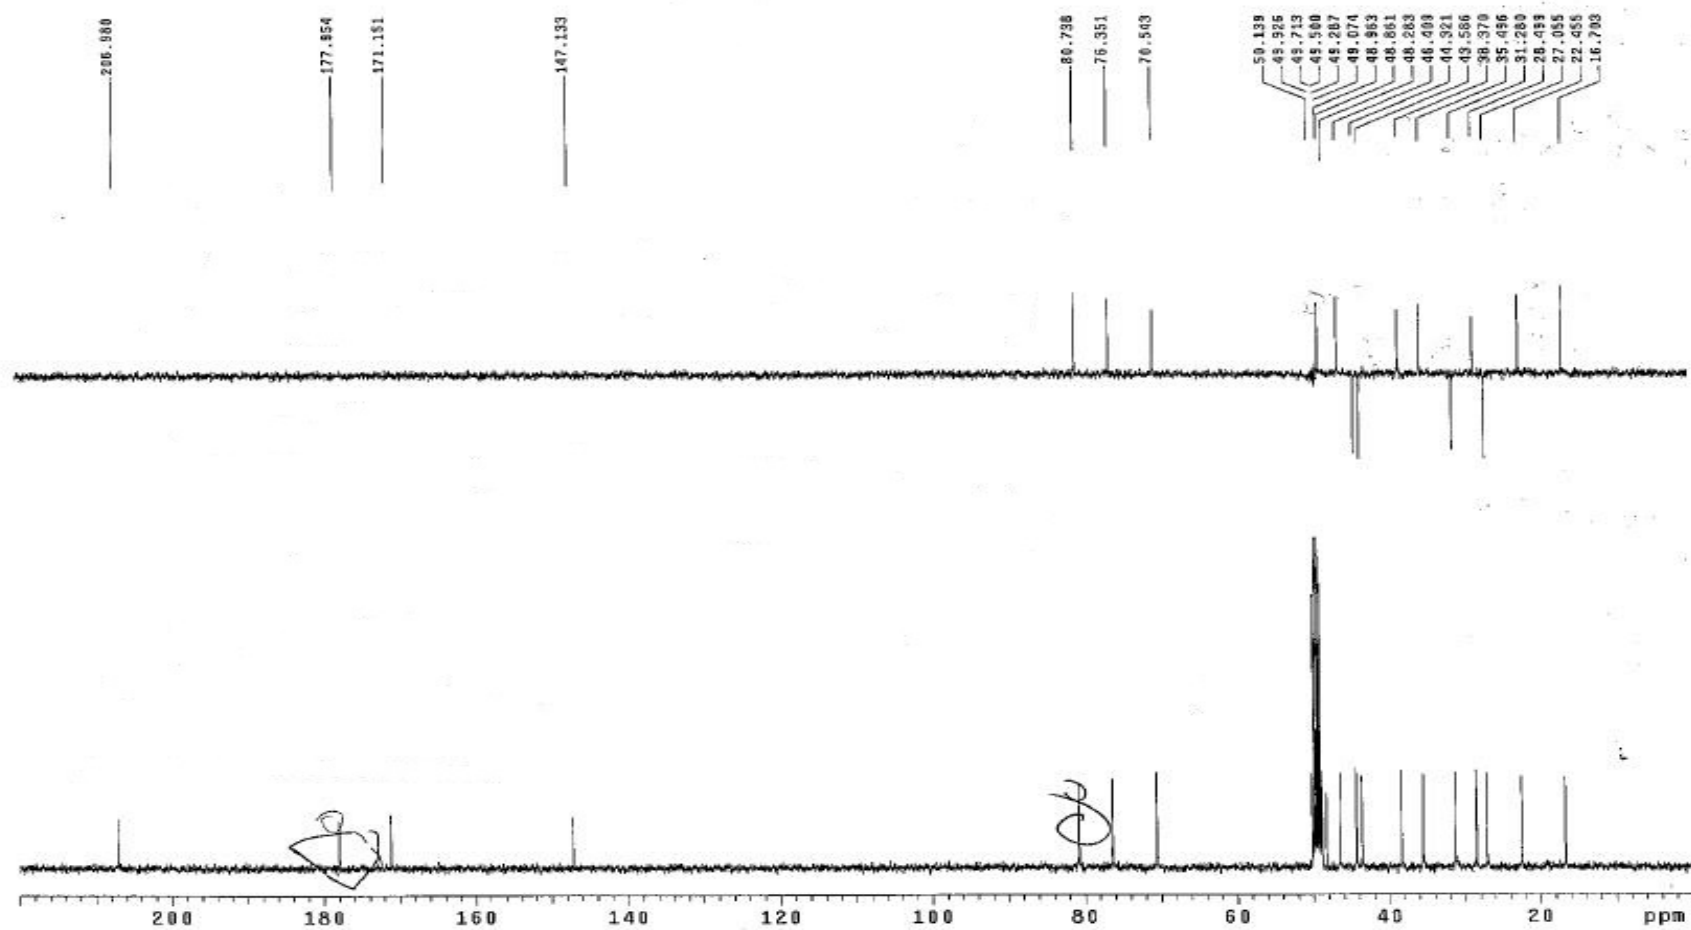

Figure S52 HMQC of Lanceolatin G (7)

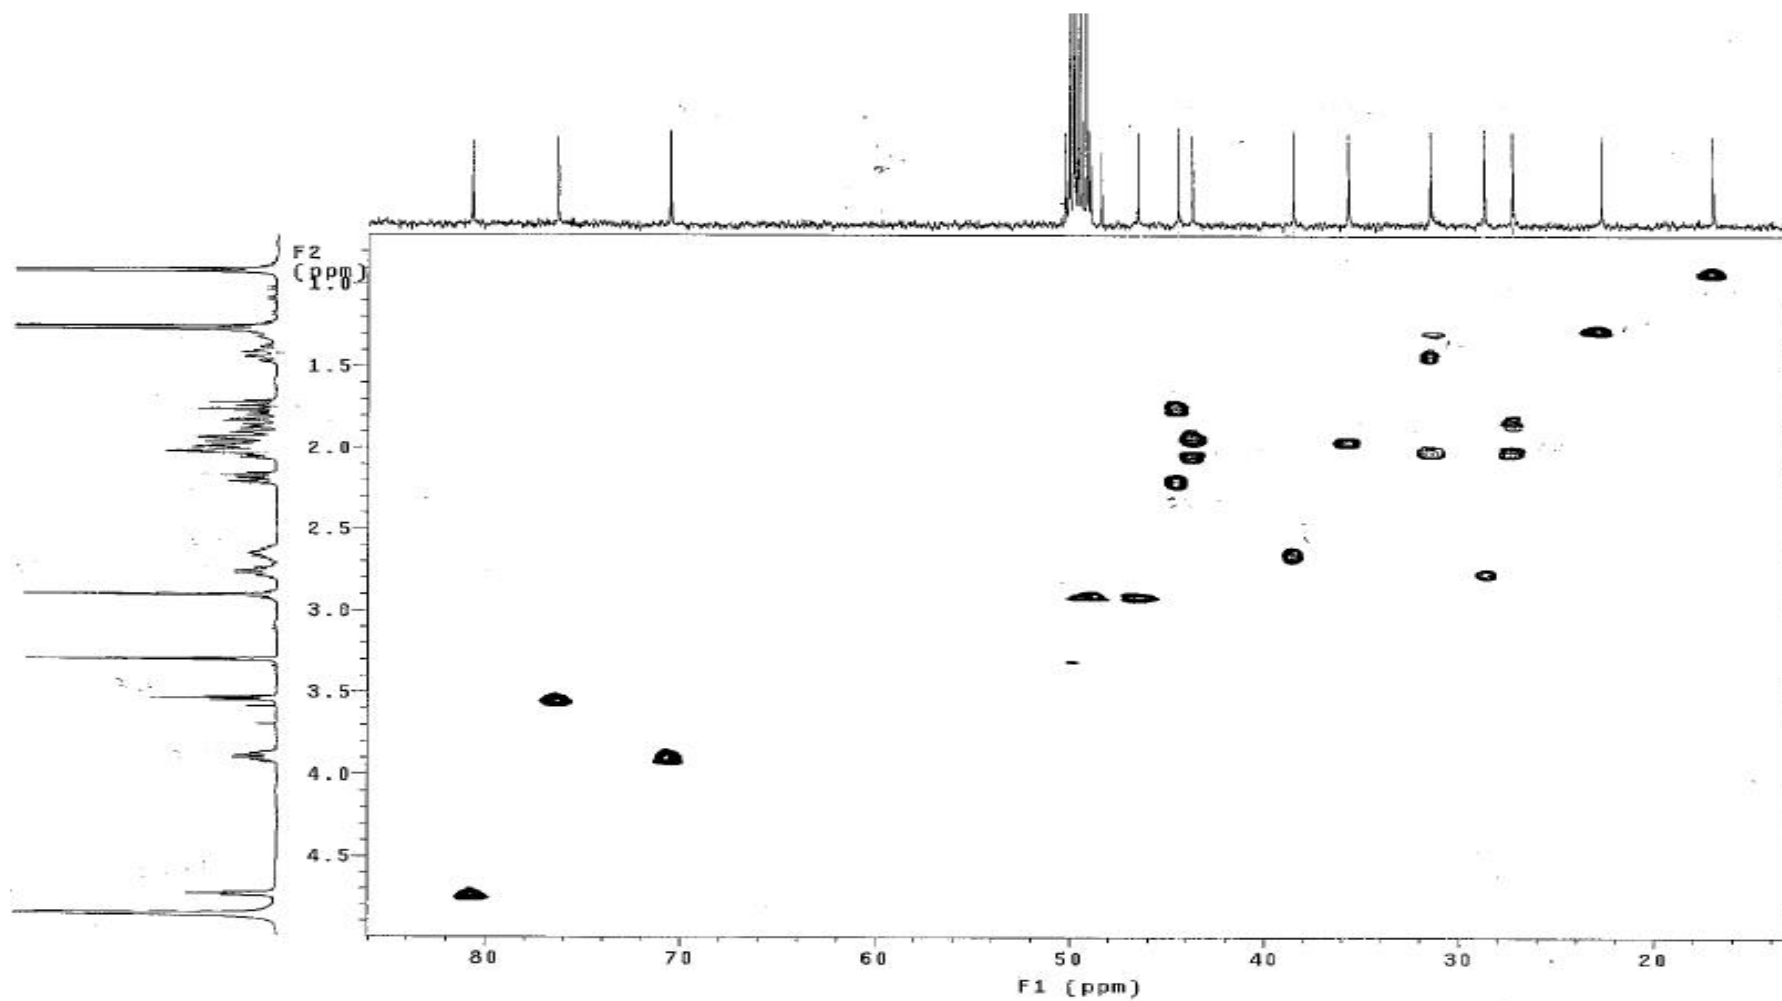

**Figure S53** HMBC of Lanceolatin G (7)

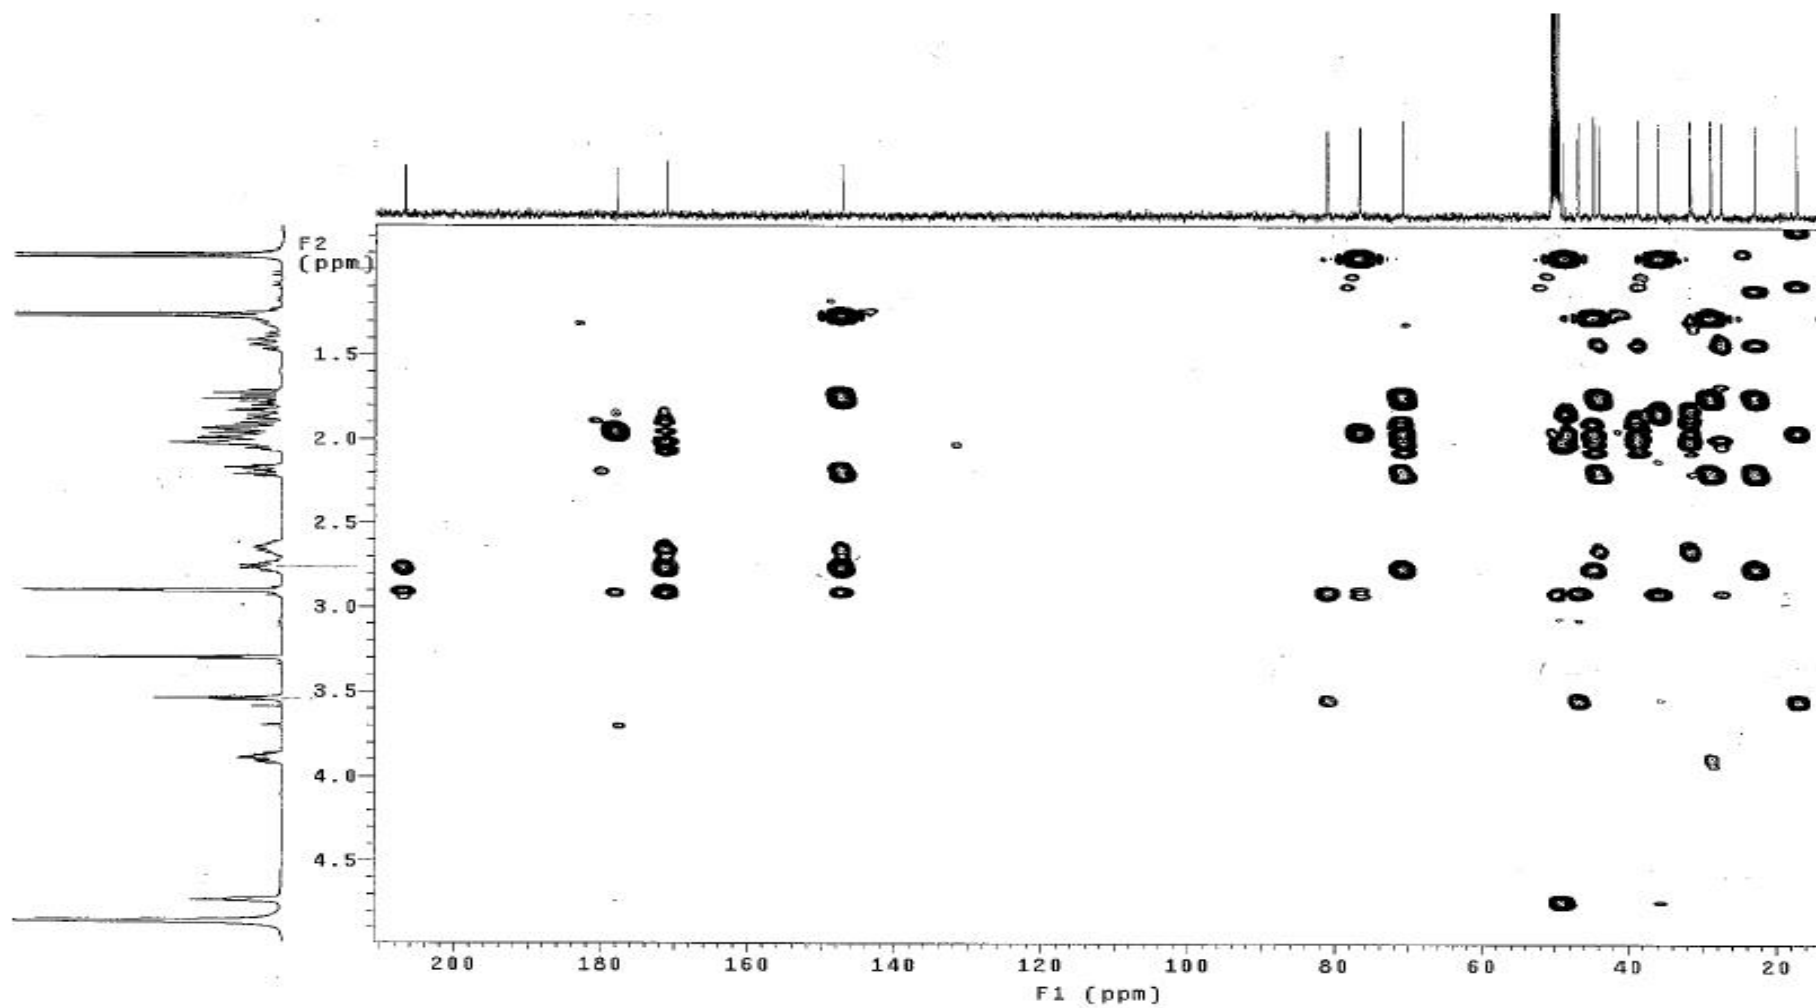

**Figure S54** NOSEY of Lanceolatin G (7)



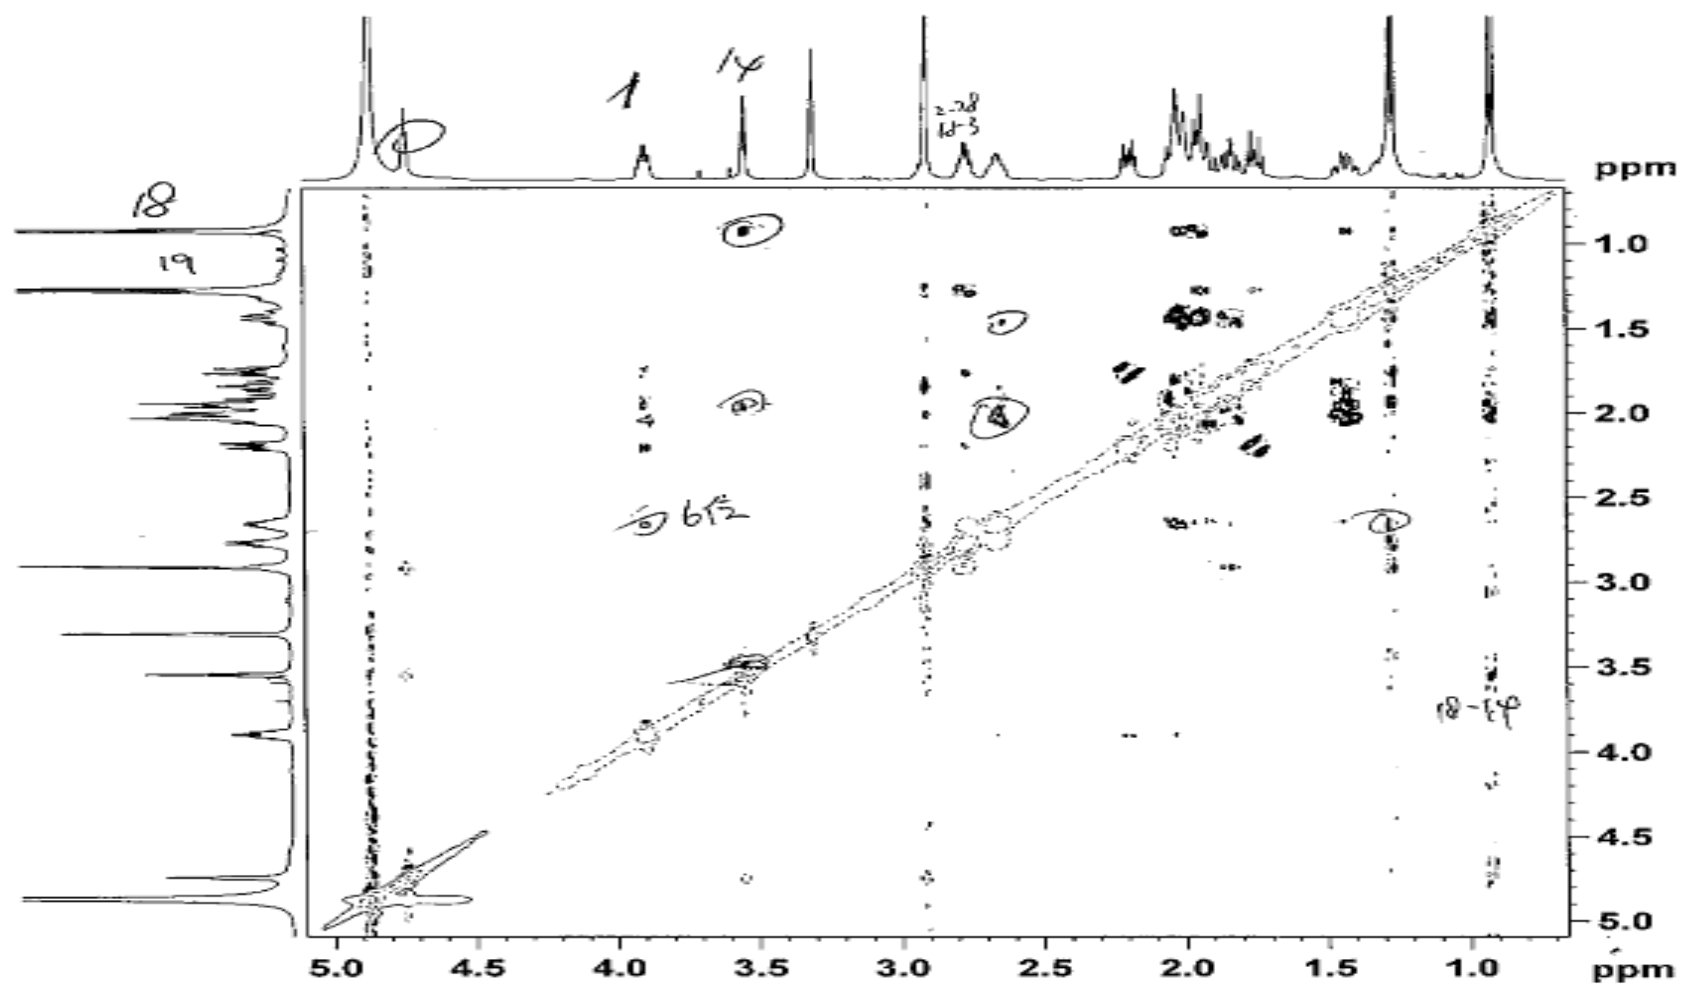

Supplement: c4ra10665b1.pdf [file c4ra10665b1.pdf]
